# Supplementary material
Source: PubMed Central journal article supplement (PMC3136038)
Supplement: NIHMS309266-supplement-1.pdf [file NIHMS309266-supplement-1.pdf]

## ***Supporting Information***

### **Theoretical Study of the Mechanism of Oxoiron(IV) Formation from H<sub>2</sub>O<sub>2</sub> and a Nonheme Iron(II) Complex: O–O Cleavage Involving Proton-Coupled Electron Transfer**

Hajime Hirao, Feifei Li, Lawrence Que, Jr., and Keiji Morokuma

#### **Contents**

- **Complete list of authors of Gaussian 09**
- **Tables S1-S8: Summaries of energetic data**
- **Figure S1: Geometric change during PCET obtained by IRC calculations (B3LYP(SCRF)/B1).**
- **XYZ coordinates of optimized geometries**

## Complete list of authors of Gaussian 09

*Gaussian 09, revision B.01*; Frisch, M. J.; Trucks, G. W.; Schlegel, H. B.; Scuseria, G. E.; Robb, M. A.; Cheeseman, J. R.; Montgomery, J. A., Jr.; Vreven, T.; Kudin, K.; Burant, J. C.; Millam, J. M.; Iyengar, S. S.; Tomasi, J.; Barone, V.; Mennucci, B.; Cossi, M.; Scalmani, G.; Rega, N.; Petersson, G.A.; Nakatsuji, H.; Hada, M.; Ehara, M.; Toyota, K.; Fukuda, R.; Hasegawa, J.; Ishida, M.; Nakajima, T.; Honda, Y.; Kitao, O.; Nakai, H.; Klene, M.; Li, X.; Knox, J. E.; Hratchian, H. P.; Cross, J. B.; Adamo, C.; Jaramillo, J.; Comperts, R.; Startmann, R. E.; Yazyev, O.; Austin, A. J.; Cammi, R.; Pomelli, C.; Ochterski, J. W.; Ayala, P. Y.; Morokuma, K.; Voth, G. A.; Salvador, P.; Dannenberg, J. J.; Zakrzewski, V. G.; Dapprich, S.; Daniels, A. D.; Strain, M. C.; Farkas, O.; Malick, D. K.; Rabuck, A. D.; Raghavachari, K.; Foresman, J. B.; Ortiz, J. V.; Cui, Q.; Baboul, A. G.; Clifford, S.; Cioslowski, J.; Stefanov, B. B.; Liu, G.; Liashenko, A.; Piskorz, P.; Komaromi, I.; Martin, R. L.; Fox, D. J.; Keith, T.; Al-Laham, M. A.; Peng, C. Y.; Nanayakkara, A.; Challacombe, M.; Gill, P. M. W.; Johnson, B.; Chen, W.; Wong, M. W., Gonzalez, C.; Pople, J. A.; Gaussian, Inc.: Wallingford CT, 2009.

**Table S1. Energy data for Model-1, B3LYP/B1**

|                     | E<br>(Eh)    | $\Delta E$<br>(kcal/mol) | ZPE<br>(Eh) | $\Delta (E+ZPE)$<br>(kcal/mol) |
|---------------------|--------------|--------------------------|-------------|--------------------------------|
| <sup>5</sup> RC     | -1506.525942 | 0.0                      | 0.697957    | 0.0                            |
| <sup>3</sup> RC     | -1506.507964 | 11.3                     | 0.699599    | 12.3                           |
| <sup>5</sup> TS1    | -1506.517033 | 5.6                      | 0.698531    | 6.0                            |
| <sup>3</sup> TS1    | -1506.498054 | 17.5                     | 0.699654    | 18.6                           |
| <sup>5</sup> Int    | -1506.525304 | 0.4                      | 0.698772    | 0.9                            |
| <sup>3</sup> Int    | -1506.505390 | 12.9                     | 0.700676    | 14.6                           |
| <sup>5</sup> TSoo   | -1506.512649 | 8.3                      | 0.697080    | 7.8                            |
| <sup>3</sup> TSoo   | -1506.493225 | 20.5                     | 0.698241    | 20.7                           |
| <sup>5</sup> Int-oh | -1506.518215 | 4.8                      | 0.696880    | 4.2                            |
| <sup>5</sup> TSoh   | -1506.515321 | 6.7                      | 0.692955    | 3.5                            |
| <sup>5</sup> P      | -1506.532296 | -4.0                     | 0.698453    | -3.7                           |
| <sup>3</sup> P      | -1506.537018 | -6.9                     | 0.701329    | -4.8                           |

**Table S2. Energy data for Model-1, B3LYP/B2//B1**

|                     | E<br>(Eh)    | $\Delta E$<br>(kcal/mol) | ZPE<br>(Eh) | $\Delta (E+ZPE)$<br>(kcal/mol) |
|---------------------|--------------|--------------------------|-------------|--------------------------------|
| <sup>5</sup> RC     | -2646.838900 | 0.0                      | 0.697957    | 0.0                            |
| <sup>3</sup> RC     | -2646.824363 | 9.1                      | 0.699599    | 10.2                           |
| <sup>5</sup> TS1    | -2646.826193 | 8.0                      | 0.698531    | 8.3                            |
| <sup>3</sup> TS1    | -2646.812394 | 16.6                     | 0.699654    | 17.7                           |
| <sup>5</sup> Int    | -2646.832140 | 4.2                      | 0.698772    | 4.8                            |
| <sup>3</sup> Int    | -2646.818035 | 13.1                     | 0.700676    | 14.8                           |
| <sup>5</sup> TSoo   | -2646.823070 | 9.9                      | 0.697080    | 9.4                            |
| <sup>3</sup> TSoo   | -2646.809877 | 18.2                     | 0.698241    | 18.4                           |
| <sup>5</sup> Int-oh | -2646.830911 | 5.0                      | 0.696880    | 4.3                            |
| <sup>5</sup> TSoh   | -2646.830866 | 5.0                      | 0.692955    | 1.9                            |
| <sup>5</sup> P      | -2646.851472 | -7.9                     | 0.698453    | -7.6                           |
| <sup>3</sup> P      | -2646.858451 | -12.3                    | 0.701329    | -10.2                          |

**Table S3. Energy data for Model-1, B3LYP(SCRf)/B1**

|                        | E<br>(Eh)    | $\Delta E$<br>(kcal/mol) | ZPE<br>(Eh) | $\Delta (E+ZPE)$<br>(kcal/mol) |
|------------------------|--------------|--------------------------|-------------|--------------------------------|
| <sup>5</sup> RC        | -1506.722272 | 0.0                      | 0.697715    | 0.0                            |
| <sup>3</sup> RC        | -1506.701732 | 12.9                     | 0.700469    | 14.6                           |
| <sup>5</sup> TS1       | -1506.702781 | 12.2                     | 0.698509    | 12.7                           |
| <sup>3</sup> TS1       | -1506.681323 | 25.7                     | 0.700638    | 27.5                           |
| <sup>5</sup> TShooh    | -1506.676486 | 28.7                     | 0.696841    | 28.2                           |
| <sup>3</sup> TShooh    | -1506.657606 | 40.6                     | 0.699536    | 41.7                           |
| <sup>5</sup> Int       | -1506.708651 | 8.5                      | 0.699323    | 9.6                            |
| <sup>3</sup> Int       | -1506.687827 | 21.6                     | 0.700765    | 23.5                           |
| <sup>5</sup> Int-ho-oh | -1506.676486 | 28.7                     | 0.696841    | 28.2                           |
| <sup>3</sup> Int-ho-oh | -1506.657606 | 40.6                     | 0.699536    | 41.7                           |
| <sup>5</sup> TSoo      | -1506.694805 | 17.2                     | 0.697088    | 16.8                           |
| <sup>3</sup> TSoo      | -1506.674994 | 29.7                     | 0.698022    | 29.9                           |
| <sup>5</sup> TShat     | -1506.692004 | 19.0                     | 0.691031    | 14.8                           |
| <sup>3</sup> TShat     | -1506.677056 | 28.4                     | 0.693974    | 26.0                           |
| <sup>5</sup> Int-oh    | -1506.700144 | 13.9                     | 0.695752    | 12.7                           |
| <sup>5</sup> P         | -1506.732126 | -6.2                     | 0.699638    | -5.0                           |
| <sup>3</sup> P         | -1506.737825 | -9.8                     | 0.702525    | -6.7                           |

**Table S4. Energy data for Model-1, B3LYP(SCRf)/B2//B3LYP(SCRf)/B1**

|                        | E<br>(Eh)    | $\Delta E$<br>(kcal/mol) | ZPE<br>(Eh) | $\Delta (E+ZPE)$<br>(kcal/mol) |
|------------------------|--------------|--------------------------|-------------|--------------------------------|
| <sup>5</sup> RC        | -2647.037555 | 0.0                      | 0.697715    | 0.0                            |
| <sup>3</sup> RC        | -2647.020129 | 10.9                     | 0.700469    | 12.7                           |
| <sup>5</sup> TS1       | -2647.013686 | 15.0                     | 0.698509    | 15.5                           |
| <sup>3</sup> TS1       | -2646.995873 | 26.2                     | 0.700638    | 28.0                           |
| <sup>5</sup> TShooh    | -2646.992552 | 28.2                     | 0.696841    | 27.7                           |
| <sup>3</sup> TShooh    | -2646.977480 | 37.7                     | 0.699536    | 38.8                           |
| <sup>5</sup> Int       | -2647.016662 | 13.1                     | 0.699323    | 14.1                           |
| <sup>3</sup> Int       | -2647.002309 | 22.1                     | 0.700765    | 24.0                           |
| <sup>5</sup> Int-ho-oh | -2647.016200 | 13.4                     | 0.695496    | 12.0                           |
| <sup>3</sup> Int-ho-oh | -2647.000929 | 23.0                     | 0.696506    | 22.2                           |
| <sup>5</sup> TSoo      | -2647.006800 | 19.3                     | 0.697088    | 18.9                           |
| <sup>3</sup> TSoo      | -2646.994016 | 27.3                     | 0.698022    | 27.5                           |
| <sup>5</sup> TShat     | -2647.010592 | 16.9                     | 0.691031    | 12.7                           |
| <sup>3</sup> TShat     | -2646.999714 | 23.7                     | 0.693974    | 21.4                           |
| <sup>5</sup> Int-oh    | -2647.015575 | 13.8                     | 0.695752    | 12.6                           |
| <sup>5</sup> P         | -2647.053198 | -9.8                     | 0.699638    | -8.6                           |
| <sup>3</sup> P         | -2647.061063 | -14.8                    | 0.702525    | -11.7                          |

**Table S5. Energy data for Model-2, B3LYP(SCRf)/B1**

|                         | E<br>(Eh)    | $\Delta E$<br>(kcal/mol) | ZPE<br>(Eh) | $\Delta (E+ZPE)$<br>(kcal/mol) |
|-------------------------|--------------|--------------------------|-------------|--------------------------------|
| <sup>5</sup> RC         | -1312.549890 | 0.0                      | 0.599194    | 0.0                            |
| <sup>3</sup> RC         | -1312.529500 | 12.8                     | 0.601103    | 14.0                           |
| <sup>5</sup> TS1        | -1312.491666 | 36.5                     | 0.596243    | 34.7                           |
| <sup>3</sup> TS1        | -1312.467013 | 52.0                     | 0.598646    | 51.7                           |
| <sup>5</sup> TShooh     | -1312.508871 | 25.7                     | 0.597943    | 25.0                           |
| <sup>3</sup> TShooh     | -1312.489703 | 37.8                     | 0.599080    | 37.7                           |
| <sup>5</sup> Int        | -1312.506820 | 27.0                     | 0.598521    | 26.6                           |
| <sup>3</sup> Int        | -1312.483221 | 41.8                     | 0.600823    | 42.9                           |
| <sup>5</sup> Int-ho-oh1 | -1312.519604 | 19.0                     | 0.595813    | 16.9                           |
| <sup>3</sup> Int-ho-oh1 | -1312.504709 | 28.4                     | 0.597657    | 27.4                           |
| <sup>5</sup> Int-ho-oh2 | -1312.525651 | 15.2                     | 0.596515    | 13.5                           |
| <sup>3</sup> Int-ho-oh2 | -1312.507088 | 26.9                     | 0.597686    | 25.9                           |
| <sup>5</sup> TSoo       | -1312.506325 | 27.3                     | 0.597977    | 26.6                           |
| <sup>3</sup> TSoo       | -1312.482809 | 42.1                     | 0.599845    | 42.5                           |
| <sup>5</sup> TShat      | -1312.520046 | 18.7                     | 0.592529    | 14.5                           |
| <sup>3</sup> TShat      | -1312.506058 | 27.5                     | 0.595829    | 25.4                           |
| <sup>5</sup> P          | -1312.561710 | -7.4                     | 0.601206    | -6.2                           |
| <sup>3</sup> P          | -1312.567711 | -11.2                    | 0.603665    | -8.4                           |

**Table S6. Energy data for Model-2, B3LYP(SCRf)/B2//B3LYP(SCRf)/B1**

|                         | E<br>(Eh)    | $\Delta E$<br>(kcal/mol) | ZPE<br>(Eh) | $\Delta (E+ZPE)$<br>(kcal/mol) |
|-------------------------|--------------|--------------------------|-------------|--------------------------------|
| <sup>5</sup> RC         | -2452.806587 | 0.0                      | 0.599194    | 0.0                            |
| <sup>3</sup> RC         | -2452.789007 | 11.0                     | 0.601103    | 12.2                           |
| <sup>5</sup> TS1        | -2452.741480 | 40.9                     | 0.596243    | 39.0                           |
| <sup>3</sup> TS1        | -2452.721333 | 53.5                     | 0.598646    | 53.2                           |
| <sup>5</sup> TShooh     | -2452.764937 | 26.1                     | 0.597943    | 25.4                           |
| <sup>3</sup> TShooh     | -2452.750034 | 35.5                     | 0.599080    | 35.4                           |
| <sup>5</sup> Int        | -2452.757585 | 30.7                     | 0.598521    | 30.3                           |
| <sup>3</sup> Int        | -2452.738485 | 42.7                     | 0.600823    | 43.8                           |
| <sup>5</sup> Int-ho-oh1 | -2452.778342 | 17.7                     | 0.595813    | 15.6                           |
| <sup>3</sup> Int-ho-oh1 | -2452.767604 | 24.5                     | 0.597657    | 23.5                           |
| <sup>5</sup> Int-ho-oh2 | -2452.778200 | 17.8                     | 0.596515    | 16.1                           |
| <sup>3</sup> Int-ho-oh2 | -2452.765210 | 26.0                     | 0.597686    | 25.0                           |
| <sup>5</sup> TSoo       | -2452.757753 | 30.6                     | 0.597977    | 29.9                           |
| <sup>3</sup> TSoo       | -2452.738357 | 42.8                     | 0.599845    | 43.2                           |
| <sup>5</sup> TShat      | -2452.780151 | 16.6                     | 0.592529    | 12.4                           |
| <sup>3</sup> TShat      | -2452.769658 | 23.2                     | 0.595829    | 21.1                           |
| <sup>5</sup> P          | -2452.823697 | -10.7                    | 0.601206    | -9.5                           |
| <sup>3</sup> P          | -2452.831597 | -15.7                    | 0.603665    | -12.9                          |

**Table S7. Free energy data for Model-1, B3LYP(SCRf)/B1 (298.15K, 1atom)**

|                        | G (Eh)       | $\Delta G$ (kcal/mol) |
|------------------------|--------------|-----------------------|
| <sup>5</sup> RC        | -1506.101153 | 0.0                   |
| <sup>3</sup> RC        | -1506.072875 | 17.7                  |
| <sup>5</sup> TS1       | -1506.073377 | 17.4                  |
| <sup>3</sup> TS1       | -1506.050107 | 32.0                  |
| <sup>5</sup> TShooh    | -1506.049873 | 32.2                  |
| <sup>3</sup> TShooh    | -1506.026998 | 46.5                  |
| <sup>5</sup> Int       | -1506.079933 | 13.3                  |
| <sup>3</sup> Int       | -1506.058315 | 26.9                  |
| <sup>5</sup> Int-ho-oh | -1506.075335 | 16.2                  |
| <sup>3</sup> Int-ho-oh | -1506.055946 | 28.4                  |
| <sup>5</sup> TSoo      | -1506.067743 | 21.0                  |
| <sup>3</sup> TSoo      | -1506.051737 | 31.0                  |
| <sup>5</sup> Int-oh    | -1506.076568 | 15.4                  |
| <sup>5</sup> TShat     | -1506.072353 | 18.1                  |
| <sup>3</sup> TShat     | -1506.054125 | 29.5                  |
| <sup>5</sup> P         | -1506.105234 | -2.6                  |
| <sup>3</sup> P         | -1506.108007 | -4.3                  |



**Table S8. Free energy data for Model-2, B3LYP(SCRf)/B1 (298.15K, 1atom)**

|                         | G (Eh)       | $\Delta G$ (kcal/mol) |
|-------------------------|--------------|-----------------------|
| <sup>5</sup> RC         | -1312.021566 | 0.0                   |
| <sup>3</sup> RC         | -1311.997217 | 15.3                  |
| <sup>5</sup> TS1        | -1311.960253 | 38.5                  |
| <sup>3</sup> TS1        | -1311.934055 | 54.9                  |
| <sup>5</sup> TShooh     | -1311.975818 | 28.7                  |
| <sup>3</sup> TShooh     | -1311.956813 | 40.6                  |
| <sup>5</sup> Int        | -1311.974859 | 29.3                  |
| <sup>3</sup> Int        | -1311.949614 | 45.2                  |
| <sup>5</sup> Int-ho-oh1 | -1311.992024 | 18.5                  |
| <sup>3</sup> Int-ho-oh1 | -1311.972203 | 31.0                  |
| <sup>5</sup> Int-ho-oh2 | -1311.995686 | 16.2                  |
| <sup>3</sup> Int-ho-oh2 | -1311.978077 | 27.3                  |
| <sup>5</sup> TSoo       | -1311.97408  | 29.8                  |
| <sup>3</sup> TSoo       | -1311.947747 | 46.3                  |
| <sup>5</sup> TShat      | -1311.995589 | 16.3                  |
| <sup>3</sup> TShat      | -1311.978317 | 27.1                  |
| <sup>5</sup> P          | -1312.028665 | -4.5                  |
| <sup>3</sup> P          | -1312.02933  | -4.9                  |

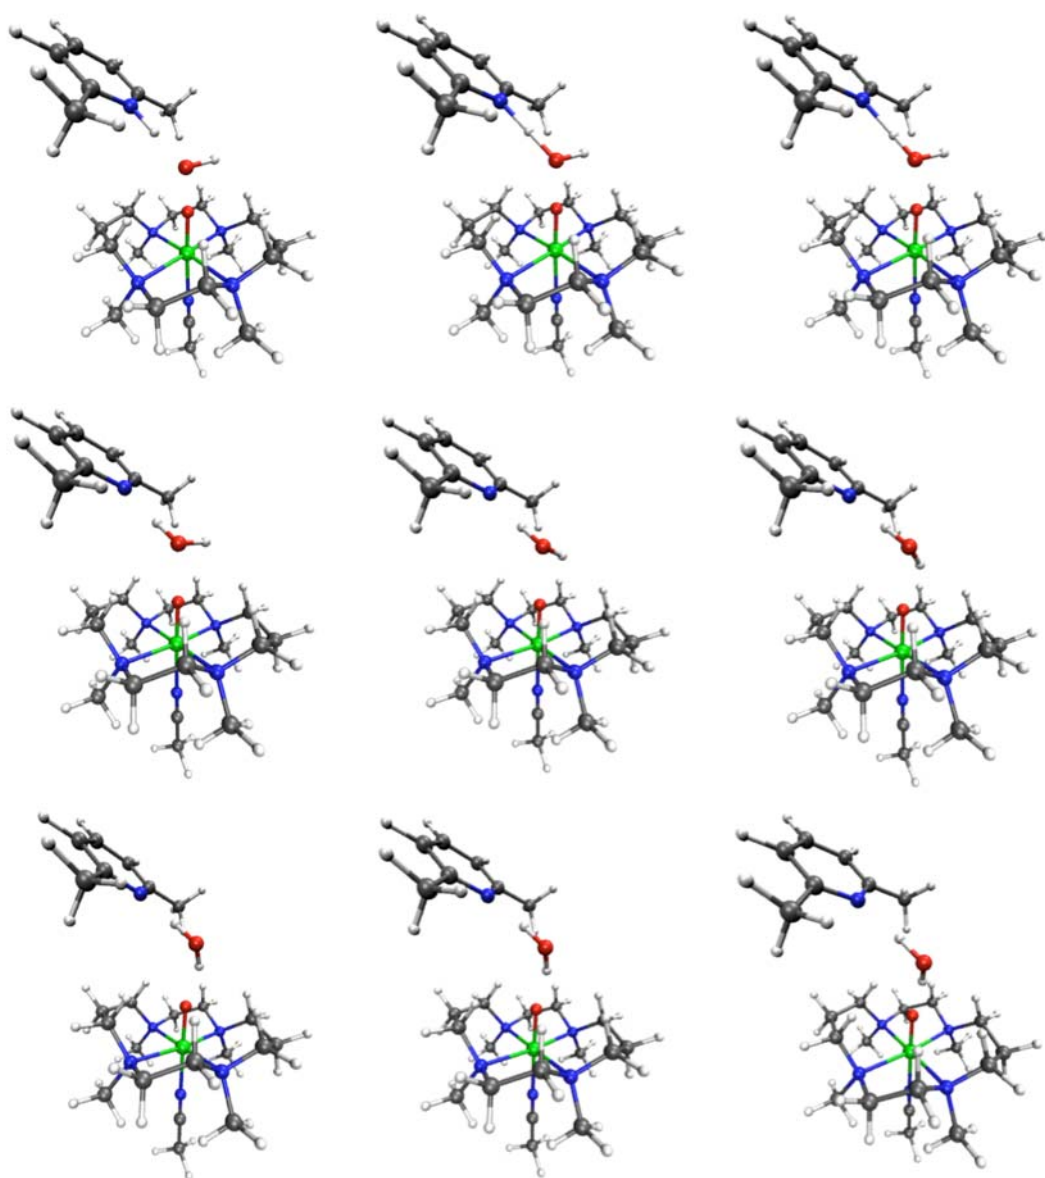

**Figure S1. Geometric change during PCET obtained by IRC calculations (B3LYP(SCRF)/B1).**

## XYZ coordinates of optimized geometries (in Å)

|                                         |           |           |           |           |           |           |
|-----------------------------------------|-----------|-----------|-----------|-----------|-----------|-----------|
|                                         |           |           | C         | -1.265488 | -5.967714 | -0.692725 |
|                                         |           |           | H         | -1.636974 | -5.030941 | -0.267429 |
|                                         |           |           | H         | -1.061895 | -5.793434 | -1.757600 |
|                                         |           |           | H         | -2.056001 | -6.720846 | -0.632881 |
| <b>=== Model-1, 5RC (gas-phase) ===</b> |           |           |           |           |           |           |
| Fe                                      | 0.126629  | 1.062156  | 0.009457  |           |           |           |
| N                                       | -1.273998 | 1.058728  | 1.745292  |           |           |           |
| N                                       | 1.706074  | 1.249004  | 1.625156  |           |           |           |
| N                                       | 1.614414  | 0.284806  | -1.447867 |           |           |           |
| N                                       | -1.370475 | 0.109697  | -1.387523 |           |           |           |
| C                                       | -0.391401 | 0.698108  | 2.899363  |           |           |           |
| H                                       | -0.912247 | 0.897143  | 3.846942  |           |           |           |
| H                                       | -0.209883 | -0.377522 | 2.842797  |           |           |           |
| C                                       | 0.923997  | 1.461752  | 2.883672  |           |           |           |
| H                                       | 1.524977  | 1.162303  | 3.753888  |           |           |           |
| H                                       | 0.745175  | 2.535384  | 2.983247  |           |           |           |
| C                                       | 2.425722  | -0.067738 | 1.703411  |           |           |           |
| H                                       | 3.137635  | -0.019240 | 2.540997  |           |           |           |
| H                                       | 1.689989  | -0.839628 | 1.947961  |           |           |           |
| C                                       | 3.184287  | -0.491618 | 0.439680  |           |           |           |
| H                                       | 3.719367  | -1.409738 | 0.711894  |           |           |           |
| H                                       | 3.972167  | 0.224480  | 0.187494  |           |           |           |
| C                                       | 2.342261  | -0.856560 | -0.789622 |           |           |           |
| H                                       | 1.598277  | -1.606901 | -0.501782 |           |           |           |
| H                                       | 3.000401  | -1.314418 | -1.542819 |           |           |           |
| C                                       | 0.799020  | -0.232954 | -2.595204 |           |           |           |
| H                                       | 0.623077  | 0.603853  | -3.275639 |           |           |           |
| H                                       | 1.379512  | -0.977955 | -3.156490 |           |           |           |
| C                                       | -0.521016 | -0.850360 | -2.157247 |           |           |           |
| H                                       | -0.343325 | -1.713086 | -1.511615 |           |           |           |
| H                                       | -1.061229 | -1.206560 | -3.046439 |           |           |           |
| C                                       | -2.484355 | -0.669730 | -0.748923 |           |           |           |
| H                                       | -2.053670 | -1.600327 | -0.368882 |           |           |           |
| H                                       | -3.206348 | -0.937398 | -1.533404 |           |           |           |
| C                                       | -3.202578 | 0.042747  | 0.397535  |           |           |           |
| H                                       | -3.551104 | 1.040611  | 0.108471  |           |           |           |
| H                                       | -4.115986 | -0.529030 | 0.601478  |           |           |           |
| C                                       | -2.403822 | 0.069736  | 1.701388  |           |           |           |
| H                                       | -1.968755 | -0.919400 | 1.867092  |           |           |           |
| H                                       | -3.071589 | 0.283358  | 2.547738  |           |           |           |
| C                                       | -1.839477 | 2.422739  | 1.941958  |           |           |           |
| H                                       | -2.413354 | 2.467327  | 2.877202  |           |           |           |
| H                                       | -1.044937 | 3.168574  | 1.980326  |           |           |           |
| H                                       | -2.504104 | 2.675203  | 1.114189  |           |           |           |
| C                                       | 2.685519  | 2.363101  | 1.529846  |           |           |           |
| H                                       | 3.318253  | 2.401054  | 2.427067  |           |           |           |
| H                                       | 2.152421  | 3.311265  | 1.433569  |           |           |           |
| H                                       | 3.331886  | 2.241950  | 0.662838  |           |           |           |
| C                                       | 2.587335  | 1.259952  | -2.011291 |           |           |           |
| H                                       | 3.235155  | 1.658827  | -1.234074 |           |           |           |
| H                                       | 2.047210  | 2.089989  | -2.470828 |           |           |           |
| H                                       | 3.215187  | 0.779447  | -2.773337 |           |           |           |
| C                                       | -1.958896 | 1.125878  | -2.299844 |           |           |           |
| H                                       | -1.176562 | 1.709887  | -2.786704 |           |           |           |
| H                                       | -2.590475 | 1.812652  | -1.733391 |           |           |           |
| H                                       | -2.572208 | 0.642582  | -3.072458 |           |           |           |
| N                                       | 0.065853  | 3.128023  | -0.626350 |           |           |           |
| C                                       | 0.037850  | 4.233981  | -0.972881 |           |           |           |
| C                                       | 0.001311  | 5.624115  | -1.407643 |           |           |           |
| H                                       | 1.019892  | 6.021878  | -1.468815 |           |           |           |
| H                                       | -0.571685 | 6.223496  | -0.692221 |           |           |           |
| H                                       | -0.470477 | 5.697028  | -2.393138 |           |           |           |
| O                                       | -0.136941 | -2.984013 | 0.503416  |           |           |           |
| O                                       | -0.032355 | -2.636731 | 1.914106  |           |           |           |
| H                                       | 0.296982  | -3.930465 | 0.485802  |           |           |           |
| H                                       | -0.684094 | -3.238769 | 2.320937  |           |           |           |
| N                                       | 0.789060  | -5.480869 | 0.541041  |           |           |           |
| C                                       | 1.937793  | -5.834931 | 1.158749  |           |           |           |
| C                                       | 2.314892  | -7.173057 | 1.275578  |           |           |           |
| C                                       | 1.487812  | -8.160232 | 0.741670  |           |           |           |
| C                                       | 0.308641  | -7.785299 | 0.104605  |           |           |           |
| C                                       | -0.015927 | -6.428578 | 0.015863  |           |           |           |
| C                                       | 2.794989  | -4.719795 | 1.702645  |           |           |           |
| H                                       | 3.304581  | -4.194283 | 0.883508  |           |           |           |
| H                                       | 2.183705  | -3.988400 | 2.241235  |           |           |           |
| H                                       | 3.563854  | -5.103630 | 2.377917  |           |           |           |
| H                                       | 3.238641  | -7.433598 | 1.781552  |           |           |           |
| H                                       | 1.758282  | -9.208622 | 0.826147  |           |           |           |
| H                                       | -0.358467 | -8.529371 | -0.318340 |           |           |           |
| <b>=== Model-1, 3RC (gas-phase) ===</b> |           |           |           |           |           |           |
| Fe                                      | 0.132410  | 0.903126  | 0.069502  |           |           |           |
| N                                       | -1.232667 | 1.057396  | 1.704946  |           |           |           |
| N                                       | 1.631211  | 1.245226  | 1.559902  |           |           |           |
| N                                       | 1.547950  | 0.271394  | -1.397479 |           |           |           |
| N                                       | -1.314325 | 0.084951  | -1.267757 |           |           |           |
| C                                       | -0.399899 | 0.795853  | 2.921504  |           |           |           |
| H                                       | -0.947737 | 1.087840  | 3.828079  |           |           |           |
| H                                       | -0.226830 | -0.281356 | 2.970551  |           |           |           |
| C                                       | 0.909377  | 1.544767  | 2.840325  |           |           |           |
| H                                       | 1.545829  | 1.292326  | 3.698512  |           |           |           |
| H                                       | 0.740679  | 2.623372  | 2.878839  |           |           |           |
| C                                       | 2.367333  | -0.061429 | 1.705001  |           |           |           |
| H                                       | 3.075477  | 0.038794  | 2.539776  |           |           |           |
| H                                       | 1.637978  | -0.827518 | 1.983757  |           |           |           |
| C                                       | 3.132711  | -0.526394 | 0.462726  |           |           |           |
| H                                       | 3.638212  | -1.455028 | 0.754576  |           |           |           |
| H                                       | 3.941916  | 0.165174  | 0.210142  |           |           |           |
| C                                       | 2.290632  | -0.879059 | -0.766912 |           |           |           |
| H                                       | 1.554138  | -1.639421 | -0.487438 |           |           |           |
| H                                       | 2.948860  | -1.315263 | -1.531714 |           |           |           |
| C                                       | 0.762658  | -0.237729 | -2.570197 |           |           |           |
| H                                       | 0.578592  | 0.608350  | -3.236272 |           |           |           |
| H                                       | 1.361372  | -0.962541 | -3.137332 |           |           |           |
| C                                       | -0.538870 | -0.864414 | -2.127968 |           |           |           |
| H                                       | -0.356066 | -1.760924 | -1.532352 |           |           |           |
| H                                       | -1.134880 | -1.157572 | -3.003224 |           |           |           |
| C                                       | -2.435135 | -0.715157 | -0.660444 |           |           |           |
| H                                       | -1.996573 | -1.640565 | -0.277286 |           |           |           |
| H                                       | -3.126873 | -0.983610 | -1.470402 |           |           |           |
| C                                       | -3.189617 | -0.024119 | 0.467193  |           |           |           |
| H                                       | -3.600761 | 0.944729  | 0.165630  |           |           |           |
| H                                       | -4.062248 | -0.647721 | 0.696014  |           |           |           |
| C                                       | -2.363447 | 0.067558  | 1.742807  |           |           |           |
| H                                       | -1.921307 | -0.911465 | 1.945329  |           |           |           |
| H                                       | -3.004780 | 0.328022  | 2.595599  |           |           |           |
| C                                       | -1.808630 | 2.431937  | 1.775342  |           |           |           |
| H                                       | -2.444569 | 2.529965  | 2.664493  |           |           |           |
| H                                       | -1.016354 | 3.177480  | 1.819430  |           |           |           |
| H                                       | -2.410683 | 2.630572  | 0.888456  |           |           |           |
| C                                       | 2.607873  | 2.358833  | 1.384977  |           |           |           |
| H                                       | 3.217892  | 2.465814  | 2.290922  |           |           |           |
| H                                       | 2.068820  | 3.289421  | 1.204976  |           |           |           |
| H                                       | 3.275155  | 2.175358  | 0.549152  |           |           |           |
| C                                       | 2.515673  | 1.256092  | -1.959315 |           |           |           |
| H                                       | 3.200780  | 1.616850  | -1.199359 |           |           |           |
| H                                       | 1.970680  | 2.106944  | -2.369381 |           |           |           |
| H                                       | 3.104579  | 0.787376  | -2.757994 |           |           |           |
| C                                       | -1.909092 | 1.161386  | -2.112244 |           |           |           |
| H                                       | -1.130042 | 1.724290  | -2.624246 |           |           |           |
| H                                       | -2.473545 | 1.855373  | -1.489239 |           |           |           |
| H                                       | -2.585096 | 0.724628  | -2.858363 |           |           |           |
| N                                       | 0.105583  | 3.098024  | -0.634601 |           |           |           |
| C                                       | 0.084550  | 4.200234  | -0.995865 |           |           |           |
| C                                       | 0.057395  | 5.586637  | -1.449152 |           |           |           |
| H                                       | 1.077233  | 5.980647  | -1.509743 |           |           |           |
| H                                       | -0.518395 | 6.199433  | -0.747852 |           |           |           |
| H                                       | -0.406516 | 5.649281  | -2.438925 |           |           |           |
| O                                       | -0.136156 | -2.987475 | 0.567381  |           |           |           |
| O                                       | -0.010433 | -2.634483 | 1.975038  |           |           |           |
| H                                       | 0.306600  | -3.930186 | 0.539241  |           |           |           |
| H                                       | -0.657613 | -3.233616 | 2.393323  |           |           |           |
| N                                       | 0.810466  | -5.476543 | 0.538018  |           |           |           |
| C                                       | 1.929396  | -5.866024 | 1.187188  |           |           |           |
| C                                       | 2.299706  | -7.210419 | 1.249607  |           |           |           |
| C                                       | 1.498328  | -8.164989 | 0.626210  |           |           |           |
| C                                       | 0.349417  | -7.752981 | -0.043683 |           |           |           |
| C                                       | 0.029704  | -6.393306 | -0.073374 |           |           |           |
| C                                       | 2.766330  | -4.785876 | 1.825308  |           |           |           |
| H                                       | 3.353267  | -4.255655 | 1.062665  |           |           |           |
| H                                       | 2.133262  | -4.050750 | 2.332222  |           |           |           |

|   |           |           |           |
|---|-----------|-----------|-----------|
| H | 3.470339  | -5.205101 | 2.548637  |
| H | 3.199036  | -7.500131 | 1.783001  |
| H | 1.764073  | -9.217193 | 0.666782  |
| H | -0.297667 | -8.471574 | -0.535908 |
| C | -1.186680 | -5.889198 | -0.809485 |
| H | -1.633983 | -5.034575 | -0.292953 |
| H | -0.916033 | -5.562159 | -1.822310 |
| H | -1.941981 | -6.672850 | -0.910998 |

=== Model-1, 5TS1 (gas-phase) ===

|    |           |           |           |
|----|-----------|-----------|-----------|
| Fe | 0.195957  | 0.733153  | 0.114404  |
| N  | -1.307765 | 0.984496  | 1.723184  |
| N  | 1.673176  | 1.324953  | 1.700500  |
| N  | 1.809751  | 0.235101  | -1.362431 |
| N  | -1.178069 | -0.115197 | -1.420623 |
| C  | -0.461296 | 0.685258  | 2.919977  |
| H  | -1.019283 | 0.903140  | 3.843299  |
| H  | -0.229216 | -0.380277 | 2.900662  |
| C  | 0.838202  | 1.486398  | 2.938583  |
| H  | 1.420644  | 1.192569  | 3.822453  |
| H  | 0.624006  | 2.551832  | 3.050707  |
| C  | 2.604618  | 0.157294  | 1.841027  |
| H  | 3.303351  | 0.372549  | 2.664279  |
| H  | 2.002821  | -0.704252 | 2.132218  |
| C  | 3.435475  | -0.184668 | 0.591034  |
| H  | 4.116993  | -0.984770 | 0.907025  |
| H  | 4.098335  | 0.643739  | 0.321385  |
| C  | 2.705021  | -0.734805 | -0.647098 |
| H  | 2.072672  | -1.568851 | -0.335780 |
| H  | 3.459597  | -1.098200 | -1.362291 |
| C  | 1.081766  | -0.444536 | -2.483950 |
| H  | 0.911087  | 0.302152  | -3.262698 |
| H  | 1.722431  | -1.216887 | -2.931856 |
| C  | -0.247891 | -1.080439 | -2.077789 |
| H  | -0.071351 | -1.888236 | -1.366645 |
| H  | -0.715242 | -1.509909 | -2.977833 |
| C  | -2.325773 | -0.860094 | -0.810457 |
| H  | -1.904229 | -1.753178 | -0.349352 |
| H  | -3.007923 | -1.169685 | -1.616153 |
| C  | -3.109659 | -0.093033 | 0.262686  |
| H  | -3.417826 | 0.897392  | -0.090691 |
| H  | -4.046751 | -0.642152 | 0.416697  |
| C  | -2.417944 | -0.014196 | 1.631561  |
| H  | -1.988692 | -0.991181 | 1.859510  |
| H  | -3.161058 | 0.216528  | 2.408537  |
| C  | -1.893170 | 2.344395  | 1.833856  |
| H  | -2.514805 | 2.423359  | 2.736526  |
| H  | -1.107093 | 3.097827  | 1.879874  |
| H  | -2.513512 | 2.557937  | 0.962037  |
| C  | 2.456143  | 2.577221  | 1.536744  |
| H  | 3.079801  | 2.762045  | 2.422387  |
| H  | 1.777615  | 3.420738  | 1.400717  |
| H  | 3.107893  | 2.519301  | 0.667137  |
| C  | 2.619773  | 1.325894  | -1.965095 |
| H  | 3.201102  | 1.845358  | -1.206040 |
| H  | 1.961333  | 2.050435  | -2.447183 |
| H  | 3.315387  | 0.924265  | -2.715079 |
| C  | -1.703527 | 0.855941  | -2.411675 |
| H  | -0.894171 | 1.442391  | -2.847048 |
| H  | -2.394027 | 1.546304  | -1.924422 |
| H  | -2.239271 | 0.335105  | -3.217747 |
| N  | -0.003105 | 2.878158  | -0.643313 |
| C  | -0.101918 | 3.970185  | -1.020020 |
| C  | -0.226854 | 5.344975  | -1.491132 |
| H  | 0.765760  | 5.793350  | -1.603066 |
| H  | -0.804023 | 5.936350  | -0.772834 |
| H  | -0.737021 | 5.365699  | -2.459609 |
| O  | 0.162308  | -1.918070 | 0.751732  |
| O  | 0.483982  | -2.243439 | 2.161195  |
| H  | 0.495351  | -3.566248 | 0.419295  |
| H  | -0.357160 | -2.607010 | 2.489658  |
| N  | 0.657211  | -4.620312 | 0.349309  |
| C  | 1.863180  | -5.123197 | 0.727978  |
| C  | 2.070966  | -6.496690 | 0.633057  |
| C  | 1.053776  | -7.321653 | 0.158022  |
| C  | -0.171204 | -6.766259 | -0.213670 |
| C  | -0.363161 | -5.393830 | -0.111803 |
| C  | 2.904589  | -4.169185 | 1.228865  |

|   |           |           |           |
|---|-----------|-----------|-----------|
| H | 3.359432  | -3.624227 | 0.392246  |
| H | 2.453260  | -3.442336 | 1.909964  |
| H | 3.699609  | -4.712338 | 1.743924  |
| H | 3.026886  | -6.907773 | 0.937273  |
| H | 1.210743  | -8.393458 | 0.083728  |
| H | -0.980479 | -7.389886 | -0.576126 |
| C | -1.650933 | -4.717866 | -0.482039 |
| H | -2.004163 | -4.073178 | 0.328694  |
| H | -1.525168 | -4.095081 | -1.375077 |
| H | -2.422096 | -5.460500 | -0.695623 |

=== Model-1, 3TS1 (gas-phase) ===

|    |           |           |           |
|----|-----------|-----------|-----------|
| Fe | 0.248601  | 0.608741  | 0.159786  |
| N  | -1.253767 | 0.839124  | 1.589107  |
| N  | 1.552350  | 1.292359  | 1.687090  |
| N  | 1.807462  | 0.296651  | -1.243504 |
| N  | -1.012378 | -0.120773 | -1.350390 |
| C  | -0.523185 | 0.593574  | 2.871916  |
| H  | -1.175151 | 0.812944  | 3.729616  |
| H  | -0.255785 | -0.465013 | 2.894852  |
| C  | 0.725450  | 1.445805  | 2.936037  |
| H  | 1.323277  | 1.179032  | 3.815782  |
| H  | 0.468053  | 2.501484  | 3.040213  |
| C  | 2.559362  | 0.192429  | 1.901991  |
| H  | 3.212315  | 0.492374  | 2.734050  |
| H  | 2.004746  | -0.695691 | 2.211504  |
| C  | 3.438350  | -0.140783 | 0.691402  |
| H  | 4.109051  | -0.942887 | 1.023940  |
| H  | 4.105410  | 0.690504  | 0.442561  |
| C  | 2.729571  | -0.677383 | -0.557806 |
| H  | 2.116512  | -1.539198 | -0.277494 |
| H  | 3.489997  | -0.996037 | -1.285583 |
| C  | 1.189202  | -0.362913 | -2.445315 |
| H  | 1.018116  | 0.408796  | -3.198282 |
| H  | 1.894926  | -1.078688 | -2.885048 |
| C  | -0.111651 | -1.052045 | -2.094664 |
| H  | 0.073202  | -1.904976 | -1.439345 |
| H  | -0.604331 | -1.412832 | -3.009306 |
| C  | -2.200454 | -0.917760 | -0.899733 |
| H  | -1.810611 | -1.849400 | -0.487395 |
| H  | -2.803425 | -1.155792 | -1.787012 |
| C  | -3.067848 | -0.249558 | 0.162253  |
| H  | -3.462021 | 0.715707  | -0.171682 |
| H  | -3.950655 | -0.886062 | 0.298584  |
| C  | -2.375171 | -0.152854 | 1.518760  |
| H  | -1.943704 | -1.126718 | 1.758069  |
| H  | -3.104785 | 0.104910  | 2.298699  |
| C  | -1.824842 | 2.216949  | 1.573391  |
| H  | -2.480166 | 2.364246  | 2.441928  |
| H  | -1.032512 | 2.963125  | 1.585548  |
| H  | -2.404611 | 2.370111  | 0.663697  |
| C  | 2.257549  | 2.595182  | 1.501111  |
| H  | 2.774203  | 2.872356  | 2.428721  |
| H  | 1.535842  | 3.368936  | 1.238482  |
| H  | 2.997162  | 2.532863  | 0.709432  |
| C  | 2.577951  | 1.458837  | -1.777472 |
| H  | 3.209237  | 1.902140  | -1.014686 |
| H  | 1.883934  | 2.219761  | -2.135683 |
| H  | 3.224009  | 1.129565  | -2.601278 |
| C  | -1.484724 | 0.976823  | -2.242861 |
| H  | -0.657506 | 1.616554  | -2.544526 |
| H  | -2.202411 | 1.600239  | -1.709574 |
| H  | -1.971752 | 0.558837  | -3.133991 |
| N  | 0.019066  | 3.575584  | -0.856748 |
| C  | -0.105861 | 4.674157  | -1.213219 |
| C  | -0.261746 | 6.055857  | -1.660402 |
| H  | 0.719832  | 6.522766  | -1.789067 |
| H  | -0.831127 | 6.628483  | -0.921446 |
| H  | -0.794815 | 6.084562  | -2.615963 |
| O  | 0.179641  | -2.210812 | 0.812366  |
| O  | 0.705766  | -2.381096 | 2.186927  |
| H  | 0.446662  | -3.737553 | 0.486097  |
| H  | -0.036427 | -2.814602 | 2.643611  |
| N  | 0.590824  | -4.818560 | 0.401389  |
| C  | 1.842328  | -5.328910 | 0.546839  |
| C  | 2.021532  | -6.704173 | 0.435280  |
| C  | 0.923376  | -7.526800 | 0.183696  |
| C  | -0.346318 | -6.966382 | 0.053392  |

|   |           |           |           |
|---|-----------|-----------|-----------|
| C | -0.502013 | -5.588148 | 0.165539  |
| C | 2.960448  | -4.370114 | 0.830095  |
| H | 3.248530  | -3.833117 | -0.082463 |
| H | 2.644240  | -3.635846 | 1.577145  |
| H | 3.839979  | -4.906613 | 1.192391  |
| H | 3.015343  | -7.120877 | 0.554446  |
| H | 1.055841  | -8.601225 | 0.099803  |
| H | -1.216592 | -7.587707 | -0.127400 |
| C | -1.830497 | -4.899156 | 0.034739  |
| H | -1.827491 | -3.949290 | 0.574655  |
| H | -2.055575 | -4.693825 | -1.019663 |
| H | -2.632167 | -5.533483 | 0.421755  |

=== Model-1, 5Int (gas-phase) ===

|    |           |           |           |
|----|-----------|-----------|-----------|
| Fe | 0.035141  | 0.665619  | -0.005626 |
| N  | -1.276290 | 1.006894  | 1.759972  |
| N  | 1.726472  | 1.005284  | 1.447922  |
| N  | 1.432880  | 0.315279  | -1.749275 |
| N  | -1.570791 | 0.305850  | -1.534392 |
| C  | -0.371745 | 0.466365  | 2.818990  |
| H  | -0.795780 | 0.654587  | 3.817732  |
| H  | -0.302779 | -0.610348 | 2.678047  |
| C  | 1.036057  | 1.074080  | 2.779595  |
| H  | 1.647743  | 0.579573  | 3.547213  |
| H  | 0.985092  | 2.127847  | 3.062728  |
| C  | 2.563959  | -0.229434 | 1.322602  |
| H  | 3.373502  | -0.178155 | 2.068847  |
| H  | 1.927398  | -1.076265 | 1.577330  |
| C  | 3.216665  | -0.460802 | -0.057538 |
| H  | 3.864257  | -1.337932 | 0.072778  |
| H  | 3.911102  | 0.352242  | -0.291882 |
| C  | 2.334057  | -0.788325 | -1.280357 |
| H  | 1.690472  | -1.634626 | -1.040664 |
| H  | 3.000064  | -1.069974 | -2.111031 |
| C  | 0.530307  | -0.148517 | -2.859058 |
| H  | 0.402542  | 0.692480  | -3.544631 |
| H  | 1.025627  | -0.941217 | -3.436765 |
| C  | -0.845805 | -0.657778 | -2.413905 |
| H  | -0.733013 | -1.578609 | -1.843343 |
| H  | -1.436353 | -0.875841 | -3.317960 |
| C  | -2.753498 | -0.356960 | -0.902891 |
| H  | -2.445149 | -1.366009 | -0.625243 |
| H  | -3.553156 | -0.442978 | -1.653836 |
| C  | -3.313952 | 0.351102  | 0.343338  |
| H  | -3.510587 | 1.410333  | 0.142928  |
| H  | -4.302065 | -0.088413 | 0.528009  |
| C  | -2.516815 | 0.178098  | 1.648622  |
| H  | -2.220048 | -0.868897 | 1.738083  |
| H  | -3.170048 | 0.405560  | 2.504012  |
| C  | -1.653663 | 2.405111  | 2.077257  |
| H  | -2.175707 | 2.455428  | 3.043449  |
| H  | -0.767373 | 3.037887  | 2.120303  |
| H  | -2.311665 | 2.802779  | 1.303251  |
| C  | 2.589543  | 2.208809  | 1.342155  |
| H  | 3.312033  | 2.244595  | 2.170009  |
| H  | 1.972231  | 3.107563  | 1.370575  |
| H  | 3.144598  | 2.209015  | 0.405986  |
| C  | 2.249778  | 1.431100  | -2.290447 |
| H  | 2.950280  | 1.799114  | -1.543386 |
| H  | 1.598341  | 2.256412  | -2.580427 |
| H  | 2.824428  | 1.104135  | -3.168629 |
| C  | -2.030132 | 1.473537  | -2.320618 |
| H  | -1.180444 | 1.999407  | -2.756366 |
| H  | -2.560967 | 2.174717  | -1.674745 |
| H  | -2.706808 | 1.157950  | -3.127976 |
| N  | 0.020232  | 3.009333  | -0.508109 |
| C  | 0.007837  | 4.142369  | -0.755413 |
| C  | -0.008904 | 5.568026  | -1.067778 |
| H  | 1.005728  | 5.916182  | -1.286308 |
| H  | -0.401948 | 6.134652  | -0.217559 |
| H  | -0.642960 | 5.754180  | -1.940559 |
| O  | -0.155730 | -1.466446 | 0.212297  |
| O  | 0.094078  | -2.314876 | 1.409244  |
| H  | 0.730272  | -3.968137 | 1.060234  |
| H  | -0.816483 | -2.493394 | 1.705840  |
| N  | 1.051703  | -4.952819 | 0.935229  |
| C  | 1.883047  | -5.477828 | 1.873554  |
| C  | 2.310916  | -6.790578 | 1.704724  |

|   |           |           |           |
|---|-----------|-----------|-----------|
| C | 1.880027  | -7.519544 | 0.595959  |
| C | 1.022324  | -6.936212 | -0.338442 |
| C | 0.599103  | -5.624757 | -0.156943 |
| C | 2.280569  | -4.613760 | 3.035224  |
| H | 3.371474  | -4.545741 | 3.104887  |
| H | 1.871128  | -3.604321 | 2.947713  |
| H | 1.923382  | -5.052853 | 3.973717  |
| H | 2.975437  | -7.231252 | 2.439861  |
| H | 2.212275  | -8.544283 | 0.459778  |
| H | 0.677293  | -7.491554 | -1.203597 |
| C | -0.347766 | -4.908498 | -1.075180 |
| H | -0.324270 | -3.826541 | -0.912719 |
| H | -0.100214 | -5.121014 | -2.119362 |
| H | -1.373313 | -5.261290 | -0.907355 |

=== Model-1, 3Int (gas-phase) ===

|    |           |           |           |
|----|-----------|-----------|-----------|
| Fe | 0.019300  | 0.215467  | 0.070691  |
| N  | -1.187916 | 0.706083  | 1.706847  |
| N  | 1.630917  | 0.689866  | 1.362367  |
| N  | 1.275378  | -0.012421 | -1.648303 |
| N  | -1.551845 | -0.002189 | -1.288026 |
| C  | -0.345669 | 0.250010  | 2.852747  |
| H  | -0.799293 | 0.552088  | 3.808707  |
| H  | -0.307106 | -0.838139 | 2.814824  |
| C  | 1.058298  | 0.820309  | 2.751310  |
| H  | 1.716085  | 0.327575  | 3.477234  |
| H  | 1.049937  | 1.880462  | 3.010763  |
| C  | 2.553290  | -0.494442 | 1.287775  |
| H  | 3.370299  | -0.340180 | 2.008619  |
| H  | 1.974769  | -1.361774 | 1.607642  |
| C  | 3.180585  | -0.756736 | -0.092282 |
| H  | 3.826156  | -1.635220 | 0.036459  |
| H  | 3.871205  | 0.049696  | -0.358115 |
| C  | 2.253546  | -1.090606 | -1.272840 |
| H  | 1.658206  | -1.970140 | -1.025018 |
| H  | 2.879227  | -1.312849 | -2.149985 |
| C  | 0.381288  | -0.484375 | -2.767483 |
| H  | 0.244991  | 0.349727  | -3.458549 |
| H  | 0.878980  | -1.279980 | -3.335048 |
| C  | -0.970434 | -0.967139 | -2.269691 |
| H  | -0.868383 | -1.917858 | -1.745994 |
| H  | -1.650726 | -1.103812 | -3.123709 |
| C  | -2.789831 | -0.620773 | -0.716603 |
| H  | -2.526436 | -1.644888 | -0.444484 |
| H  | -3.552403 | -0.661848 | -1.507323 |
| C  | -3.362229 | 0.086013  | 0.512203  |
| H  | -3.629037 | 1.125866  | 0.297728  |
| H  | -4.313676 | -0.407421 | 0.745845  |
| C  | -2.491995 | -0.025089 | 1.764505  |
| H  | -2.260583 | -1.079450 | 1.935499  |
| H  | -3.052342 | 0.333723  | 2.639651  |
| C  | -1.445743 | 2.170410  | 1.802883  |
| H  | -1.915370 | 2.414979  | 2.765554  |
| H  | -0.519442 | 2.732816  | 1.698348  |
| H  | -2.108380 | 2.486008  | 0.997979  |
| C  | 2.399952  | 1.949334  | 1.123659  |
| H  | 3.071741  | 2.143947  | 1.969533  |
| H  | 1.711513  | 2.786725  | 1.000233  |
| H  | 3.006915  | 1.877673  | 0.228081  |
| C  | 2.007948  | 1.172530  | -2.189266 |
| H  | 2.829870  | 1.458352  | -1.541365 |
| H  | 1.329497  | 2.023045  | -2.273940 |
| H  | 2.428383  | 0.935165  | -3.174785 |
| C  | -1.906731 | 1.276450  | -1.964596 |
| H  | -1.014454 | 1.782249  | -2.330517 |
| H  | -2.393701 | 1.950199  | -1.260442 |
| H  | -2.589944 | 1.088283  | -2.804178 |
| N  | 0.132203  | 3.932069  | -0.819526 |
| C  | 0.121967  | 5.066244  | -1.069856 |
| C  | 0.109416  | 6.492601  | -1.385009 |
| H  | 1.119710  | 6.832722  | -1.632964 |
| H  | -0.254559 | 7.065286  | -0.526246 |
| H  | -0.546807 | 6.684047  | -2.239760 |
| O  | -0.142639 | -1.910256 | 0.325716  |
| O  | 0.073658  | -2.669376 | 1.590393  |
| H  | 0.700111  | -4.313079 | 1.270591  |
| H  | -0.843740 | -2.823676 | 1.878304  |
| N  | 1.045374  | -5.290022 | 1.134054  |

|   |           |           |           |   |           |           |           |
|---|-----------|-----------|-----------|---|-----------|-----------|-----------|
| C | 1.860440  | -5.817640 | 2.084799  | H | -0.794597 | -2.645142 | 1.458268  |
| C | 2.326187  | -7.115134 | 1.899104  | N | 1.133113  | -5.025674 | 1.015243  |
| C | 1.946335  | -7.827903 | 0.761470  | C | 1.734212  | -5.523848 | 2.127229  |
| C | 1.102516  | -7.243345 | -0.184580 | C | 2.169231  | -6.845166 | 2.100575  |
| C | 0.642076  | -5.946749 | 0.013772  | C | 1.978941  | -7.611034 | 0.950123  |
| C | 2.194925  | -4.973863 | 3.280820  | C | 1.351625  | -7.055789 | -0.166075 |
| H | 3.276926  | -4.955835 | 3.445884  | C | 0.919337  | -5.734929 | -0.122704 |
| H | 1.838810  | -3.947271 | 3.163525  | C | 1.894284  | -4.614631 | 3.311504  |
| H | 1.736848  | -5.396995 | 4.182647  | H | 2.953537  | -4.379455 | 3.469694  |
| H | 2.979977  | -7.556600 | 2.643295  | H | 1.347124  | -3.679083 | 3.170225  |
| H | 2.308153  | -8.840656 | 0.611570  | H | 1.532545  | -5.106122 | 4.220305  |
| H | 0.797353  | -7.786039 | -1.072423 | H | 2.649344  | -7.264233 | 2.978104  |
| C | -0.293862 | -5.230428 | -0.915157 | H | 2.315738  | -8.642992 | 0.924654  |
| H | -0.273676 | -4.148236 | -0.748569 | H | 1.190603  | -7.640047 | -1.065524 |
| H | -0.033510 | -5.443028 | -1.956138 | C | 0.217536  | -5.046353 | -1.258544 |
| H | -1.320810 | -5.585477 | -0.759549 | H | -0.015768 | -4.007229 | -1.011450 |
|   |           |           |           | H | 0.840298  | -5.065296 | -2.159609 |
|   |           |           |           | H | -0.715872 | -5.567511 | -1.499473 |

=== Model-1, 5TSoo (gas-phase) ===

|    |           |           |           |
|----|-----------|-----------|-----------|
| Fe | -0.006746 | 0.607255  | -0.036681 |
| N  | -1.223436 | 0.996444  | 1.779757  |
| N  | 1.745658  | 0.929701  | 1.353922  |
| N  | 1.306014  | 0.354440  | -1.864689 |
| N  | -1.657930 | 0.407931  | -1.538182 |
| C  | -0.304961 | 0.364948  | 2.778628  |
| H  | -0.693588 | 0.513220  | 3.797585  |
| H  | -0.275009 | -0.704153 | 2.569983  |
| C  | 1.117143  | 0.934773  | 2.720484  |
| H  | 1.745525  | 0.371409  | 3.423288  |
| H  | 1.114964  | 1.968636  | 3.073372  |
| C  | 2.569256  | -0.305441 | 1.138758  |
| H  | 3.411092  | -0.284571 | 1.849110  |
| H  | 1.937746  | -1.158552 | 1.384694  |
| C  | 3.160339  | -0.481273 | -0.275576 |
| H  | 3.811773  | -1.362398 | -0.207386 |
| H  | 3.844237  | 0.340361  | -0.511400 |
| C  | 2.227256  | -0.764722 | -1.470888 |
| H  | 1.597831  | -1.624401 | -1.242319 |
| H  | 2.858853  | -1.009537 | -2.338819 |
| C  | 0.366056  | -0.074188 | -2.959754 |
| H  | 0.244959  | 0.776869  | -3.633717 |
| H  | 0.827567  | -0.872826 | -3.555418 |
| C  | -1.014388 | -0.549371 | -2.488620 |
| H  | -0.925486 | -1.501423 | -1.967913 |
| H  | -1.648058 | -0.692105 | -3.377369 |
| C  | -2.839619 | -0.230553 | -0.875668 |
| H  | -2.561154 | -1.258974 | -0.640258 |
| H  | -3.667219 | -0.264263 | -1.599129 |
| C  | -3.327897 | 0.462612  | 0.408629  |
| H  | -3.487066 | 1.534297  | 0.243478  |
| H  | -4.327161 | 0.058068  | 0.611662  |
| C  | -2.500245 | 0.218823  | 1.682524  |
| H  | -2.241155 | -0.840001 | 1.738550  |
| H  | -3.116993 | 0.452566  | 2.562334  |
| C  | -1.529787 | 2.392912  | 2.170019  |
| H  | -1.996769 | 2.421722  | 3.164407  |
| H  | -0.619497 | 2.991672  | 2.188264  |
| H  | -2.214394 | 2.842960  | 1.449628  |
| C  | 2.610286  | 2.133104  | 1.262874  |
| H  | 3.376113  | 2.121339  | 2.051167  |
| H  | 2.003446  | 3.032752  | 1.372889  |
| H  | 3.114370  | 2.179652  | 0.299255  |
| C  | 2.103309  | 1.492029  | -2.391718 |
| H  | 2.817676  | 1.842727  | -1.649862 |
| H  | 1.440977  | 2.320579  | -2.644166 |
| H  | 2.658968  | 1.192474  | -3.291230 |
| C  | -2.105531 | 1.620033  | -2.265032 |
| H  | -1.257494 | 2.126029  | -2.726218 |
| H  | -2.578261 | 2.318862  | -1.574059 |
| H  | -2.829814 | 1.353165  | -3.047398 |
| N  | -0.000042 | 2.999931  | -0.482611 |
| C  | 0.016876  | 4.146088  | -0.658566 |
| C  | 0.035536  | 5.588198  | -0.882109 |
| H  | 1.055164  | 5.921433  | -1.100754 |
| H  | -0.324657 | 6.111357  | 0.009589  |
| H  | -0.610405 | 5.845257  | -1.727842 |
| O  | -0.189596 | -1.179175 | 0.128388  |
| O  | 0.153731  | -2.464685 | 1.337883  |
| H  | 0.792961  | -4.026815 | 1.045394  |

=== Model-1, 3TSoo (gas-phase) ===

|    |           |           |           |
|----|-----------|-----------|-----------|
| Fe | -0.014765 | 0.169794  | 0.040400  |
| N  | -1.186953 | 0.710852  | 1.699782  |
| N  | 1.620592  | 0.656176  | 1.292535  |
| N  | 1.214147  | 0.033739  | -1.722923 |
| N  | -1.590628 | 0.047438  | -1.293902 |
| C  | -0.328358 | 0.190561  | 2.808561  |
| H  | -0.761331 | 0.458029  | 3.783475  |
| H  | -0.301566 | -0.895441 | 2.716705  |
| C  | 1.079158  | 0.746781  | 2.700371  |
| H  | 1.744650  | 0.215190  | 3.389658  |
| H  | 1.094701  | 1.796838  | 2.998347  |
| C  | 2.559270  | -0.514701 | 1.174436  |
| H  | 3.392201  | -0.352371 | 1.874267  |
| H  | 2.001059  | -1.394507 | 1.495116  |
| C  | 3.155566  | -0.741231 | -0.224826 |
| H  | 3.805244  | -1.620974 | -0.131659 |
| H  | 3.838347  | 0.072586  | -0.489150 |
| C  | 2.205721  | -1.049811 | -1.393570 |
| H  | 1.622459  | -1.941168 | -1.163082 |
| H  | 2.813170  | -1.240814 | -2.290268 |
| C  | 0.296638  | -0.417190 | -2.834187 |
| H  | 0.157806  | 0.426132  | -3.513262 |
| H  | 0.779706  | -1.210103 | -3.416792 |
| C  | -1.054483 | -0.893572 | -2.325379 |
| H  | -0.964956 | -1.865473 | -1.841394 |
| H  | -1.757524 | -0.976023 | -3.166866 |
| C  | -2.840158 | -0.551634 | -0.724849 |
| H  | -2.603196 | -1.589077 | -0.480820 |
| H  | -3.606390 | -0.551674 | -1.512449 |
| C  | -3.384922 | 0.142212  | 0.523264  |
| H  | -3.640203 | 1.189150  | 0.329808  |
| H  | -4.340013 | -0.342694 | 0.759297  |
| C  | -2.499502 | -0.006246 | 1.759949  |
| H  | -2.273967 | -1.064876 | 1.904438  |
| H  | -3.041388 | 0.344770  | 2.649318  |
| C  | -1.414605 | 2.174829  | 1.847475  |
| H  | -1.843949 | 2.397301  | 2.833717  |
| H  | -0.483612 | 2.725743  | 1.725817  |
| H  | -2.102339 | 2.524545  | 1.078208  |
| C  | 2.364499  | 1.931811  | 1.060007  |
| H  | 3.051017  | 2.118972  | 1.895231  |
| H  | 1.663734  | 2.762816  | 0.967146  |
| H  | 2.954013  | 1.884613  | 0.151478  |
| C  | 1.932325  | 1.234691  | -2.250502 |
| H  | 2.776700  | 1.496193  | -1.621943 |
| H  | 1.256383  | 2.090549  | -2.287701 |
| H  | 2.318719  | 1.024615  | -3.255576 |
| C  | -1.908573 | 1.367606  | -1.911165 |
| H  | -1.004388 | 1.863547  | -2.260132 |
| H  | -2.373585 | 2.022756  | -1.176359 |
| H  | -2.599412 | 1.233257  | -2.753975 |
| N  | 0.115585  | 3.984117  | -0.795454 |
| C  | 0.126992  | 5.125489  | -1.010941 |
| C  | 0.141782  | 6.560793  | -1.281920 |
| H  | 1.085927  | 6.844829  | -1.757131 |
| H  | 0.034441  | 7.121727  | -0.348225 |
| H  | -0.683428 | 6.826993  | -1.949782 |
| O  | -0.145404 | -1.594569 | 0.299693  |

|   |           |           |           |   |           |           |           |
|---|-----------|-----------|-----------|---|-----------|-----------|-----------|
| O | 0.252898  | -2.806583 | 1.569431  | H | -0.817865 | 5.985527  | -1.314467 |
| H | 0.796786  | -4.356101 | 1.248709  | O | -0.009151 | -0.977076 | -0.044973 |
| H | -0.684304 | -2.949571 | 1.785775  | O | 0.059682  | -2.782056 | 1.151190  |
| N | 1.113750  | -5.367599 | 1.180733  | H | 0.722836  | -4.261820 | 1.176167  |
| C | 1.786892  | -5.892484 | 2.236889  | H | -0.805094 | -2.868494 | 0.715572  |
| C | 2.191765  | -7.221950 | 2.162798  | N | 1.067408  | -5.264801 | 1.315660  |
| C | 1.898738  | -7.969030 | 1.021858  | C | 0.914692  | -5.821060 | 2.544099  |
| C | 1.200053  | -7.386857 | -0.036854 | C | 1.353194  | -7.128764 | 2.732615  |
| C | 0.800186  | -6.058261 | 0.055130  | C | 1.929244  | -7.822497 | 1.668636  |
| C | 2.053310  | -5.002441 | 3.416975  | C | 2.061897  | -7.209324 | 0.421954  |
| H | 3.129672  | -4.823063 | 3.522818  | C | 1.616118  | -5.903036 | 0.252056  |
| H | 1.547316  | -4.039608 | 3.309353  | C | 0.281959  | -4.986913 | 3.620833  |
| H | 1.713267  | -5.482873 | 4.340277  | H | 0.999003  | -4.801937 | 4.429005  |
| H | 2.728902  | -7.661420 | 2.996215  | H | -0.055648 | -4.026039 | 3.223648  |
| H | 2.211423  | -9.006951 | 0.958742  | H | -0.571526 | -5.514987 | 4.059261  |
| H | 0.959633  | -7.956093 | -0.928219 | H | 1.239188  | -7.592724 | 3.706263  |
| C | 0.026896  | -5.340769 | -1.015016 | H | 2.272407  | -8.842983 | 1.809654  |
| H | -0.129811 | -4.290181 | -0.755567 | H | 2.503511  | -7.736421 | -0.416791 |
| H | 0.557885  | -5.396894 | -1.971431 | C | 1.696695  | -5.151655 | -1.046791 |
| H | -0.950216 | -5.816074 | -1.159617 | H | 1.305087  | -4.136990 | -0.936631 |

=== Model-1, 5Int-oh (gas-phase) ===

|    |           |           |           |
|----|-----------|-----------|-----------|
| Fe | 0.018808  | 0.721470  | -0.193033 |
| N  | -0.946009 | 0.889461  | 1.806417  |
| N  | 1.936933  | 0.938767  | 0.997155  |
| N  | 1.108676  | 0.633693  | -2.174101 |
| N  | -1.791335 | 0.576054  | -1.479646 |
| C  | 0.105359  | 0.193979  | 2.617970  |
| H  | -0.152048 | 0.249361  | 3.686527  |
| H  | 0.112941  | -0.853788 | 2.312552  |
| C  | 1.489784  | 0.817422  | 2.428925  |
| H  | 2.221889  | 0.227874  | 2.996617  |
| H  | 1.505516  | 1.822410  | 2.857431  |
| C  | 2.727741  | -0.269996 | 0.581131  |
| H  | 3.646908  | -0.296321 | 1.186481  |
| H  | 2.125345  | -1.145549 | 0.824031  |
| C  | 3.143496  | -0.318816 | -0.902402 |
| H  | 3.796477  | -1.196959 | -0.989226 |
| H  | 3.795183  | 0.525881  | -1.148596 |
| C  | 2.071626  | -0.507050 | -1.993510 |
| H  | 1.475926  | -1.391659 | -1.768518 |
| H  | 2.589503  | -0.666652 | -2.951454 |
| C  | 0.042504  | 0.283000  | -3.176477 |
| H  | -0.190297 | 1.191903  | -3.736050 |
| H  | 0.438175  | -0.434944 | -3.906851 |
| C  | -1.240793 | -0.288863 | -2.569946 |
| H  | -1.044528 | -1.266734 | -2.132014 |
| H  | -1.983284 | -0.406800 | -3.372891 |
| C  | -2.854742 | -0.165994 | -0.725844 |
| H  | -2.513669 | -1.197576 | -0.621596 |
| H  | -3.765259 | -0.177847 | -1.341809 |
| C  | -3.192327 | 0.391388  | 0.666553  |
| H  | -3.403088 | 1.466290  | 0.622863  |
| H  | -4.144813 | -0.070017 | 0.954897  |
| C  | -2.195996 | 0.062404  | 1.791205  |
| H  | -1.886506 | -0.980475 | 1.705621  |
| H  | -2.698738 | 0.183393  | 2.761548  |
| C  | -1.246269 | 2.225840  | 2.371605  |
| H  | -1.606746 | 2.134440  | 3.405444  |
| H  | -0.355887 | 2.855110  | 2.365391  |
| H  | -2.015101 | 2.721343  | 1.776479  |
| C  | 2.788113  | 2.152161  | 0.904917  |
| H  | 3.642394  | 2.078626  | 1.592052  |
| H  | 2.202061  | 3.034728  | 1.165088  |
| H  | 3.174226  | 2.282452  | -0.104357 |
| C  | 1.833331  | 1.820152  | -2.698792 |
| H  | 2.636002  | 2.114727  | -2.025769 |
| H  | 1.143821  | 2.659381  | -2.797373 |
| H  | 2.270480  | 1.601904  | -3.682776 |
| C  | -2.368815 | 1.818993  | -2.046985 |
| H  | -1.600542 | 2.401426  | -2.555514 |
| H  | -2.787090 | 2.433472  | -1.248593 |
| H  | -3.167206 | 1.580070  | -2.762731 |
| N  | -0.046817 | 3.059355  | -0.387129 |
| C  | -0.073311 | 4.216126  | -0.456704 |
| C  | -0.106554 | 5.671856  | -0.543509 |
| H  | 0.886566  | 6.055151  | -0.799503 |
| H  | -0.414776 | 6.097380  | 0.417068  |

=== Model-1, 5TSoh (gas-phase) ===

|    |           |           |           |
|----|-----------|-----------|-----------|
| Fe | 0.001911  | 0.783261  | -0.234976 |
| N  | -0.957098 | 0.821469  | 1.767445  |
| N  | 1.924705  | 0.876145  | 0.960759  |
| N  | 1.097578  | 0.690449  | -2.210550 |
| N  | -1.802380 | 0.630650  | -1.519413 |
| C  | 0.092241  | 0.091387  | 2.554342  |
| H  | -0.168829 | 0.112072  | 3.622598  |
| H  | 0.097929  | -0.946993 | 2.214657  |
| C  | 1.475707  | 0.718953  | 2.388236  |
| H  | 2.206014  | 0.111810  | 2.938828  |
| H  | 1.493399  | 1.712289  | 2.843253  |
| C  | 2.689775  | -0.338776 | 0.509662  |
| H  | 3.604554  | -0.400425 | 1.118073  |
| H  | 2.070188  | -1.209994 | 0.725638  |
| C  | 3.110657  | -0.349460 | -0.971370 |
| H  | 3.740847  | -1.240821 | -1.084827 |
| H  | 3.783523  | 0.486045  | -1.190685 |
| C  | 2.036234  | -0.477944 | -2.066488 |
| H  | 1.423948  | -1.359101 | -1.874870 |
| H  | 2.548424  | -0.614827 | -3.030257 |
| C  | 0.028321  | 0.393215  | -3.226024 |
| H  | -0.199273 | 1.327486  | -3.744503 |
| H  | 0.418936  | -0.295117 | -3.986590 |
| C  | -1.254249 | -0.197012 | -2.640157 |
| H  | -1.063492 | -1.192445 | -2.240878 |
| H  | -1.999138 | -0.283708 | -3.443990 |
| C  | -2.865310 | -0.142048 | -0.792713 |
| H  | -2.521664 | -1.175871 | -0.724621 |
| H  | -3.772004 | -0.134328 | -1.413435 |
| C  | -3.206531 | 0.363699  | 0.616630  |
| H  | -3.420777 | 1.438833  | 0.613847  |
| H  | -4.156978 | -0.111756 | 0.887702  |
| C  | -2.207035 | -0.007344 | 1.722968  |
| H  | -1.896733 | -1.046315 | 1.598966  |
| H  | -2.702969 | 0.077108  | 2.699998  |
| C  | -1.260052 | 2.135038  | 2.386445  |
| H  | -1.627243 | 1.998283  | 3.412343  |
| H  | -0.368878 | 2.762658  | 2.416130  |
| H  | -2.026105 | 2.655521  | 1.809104  |
| C  | 2.802719  | 2.073601  | 0.906480  |
| H  | 3.657063  | 1.954488  | 1.586385  |
| H  | 2.239425  | 2.959500  | 1.203605  |
| H  | 3.187624  | 2.230789  | -0.099281 |
| C  | 1.849545  | 1.876563  | -2.699654 |
| H  | 2.662906  | 2.128200  | -2.022436 |
| H  | 1.180360  | 2.735029  | -2.770499 |
| H  | 2.276331  | 1.677910  | -3.691850 |
| C  | -2.383572 | 1.892741  | -2.042876 |
| H  | -1.618096 | 2.492883  | -2.534929 |
| H  | -2.802802 | 2.478074  | -1.223296 |
| H  | -3.182851 | 1.675360  | -2.763756 |
| N  | -0.036496 | 3.007768  | -0.340812 |
| C  | -0.046576 | 4.165773  | -0.374757 |
| C  | -0.059217 | 5.622723  | -0.416679 |

|   |           |           |           |   |           |           |           |
|---|-----------|-----------|-----------|---|-----------|-----------|-----------|
| H | 0.931702  | 5.997829  | -0.693346 | C | 0.202312  | 3.925194  | 0.010757  |
| H | -0.329643 | 6.022684  | 0.566230  | C | 0.380008  | 5.349889  | 0.254065  |
| H | -0.790105 | 5.969823  | -1.154573 | H | 1.376324  | 5.663818  | -0.075608 |
| O | -0.026252 | -0.872774 | -0.129508 | H | 0.274759  | 5.561691  | 1.323669  |
| O | 0.120923  | -2.881049 | 1.069832  | H | -0.374961 | 5.920442  | -0.297650 |
| H | 0.637261  | -4.056098 | 1.189784  | O | -0.446938 | -0.830959 | -0.781913 |
| H | -0.725873 | -3.009975 | 0.612024  | O | 0.574991  | -3.462512 | 0.700238  |
| N | 1.057359  | -5.183518 | 1.383325  | H | 0.952276  | -4.196511 | 1.276761  |
| C | 0.939389  | -5.716424 | 2.621854  | H | 0.050786  | -3.940739 | 0.039495  |
| C | 1.401808  | -7.010732 | 2.856767  | N | 1.512702  | -5.613779 | 2.185344  |
| C | 1.979889  | -7.731631 | 1.813586  | C | 0.732123  | -6.152316 | 3.143481  |
| C | 2.084341  | -7.153949 | 0.549022  | C | 1.100730  | -7.322399 | 3.813436  |
| C | 1.606148  | -5.860734 | 0.348948  | C | 2.302002  | -7.942690 | 3.479866  |
| C | 0.315055  | -4.869352 | 3.697534  | C | 3.101818  | -7.381351 | 2.487027  |
| H | 1.071953  | -4.562328 | 4.429551  | C | 2.676942  | -6.209289 | 1.855950  |
| H | -0.137115 | -3.972067 | 3.269155  | C | -0.556967 | -5.437529 | 3.471493  |
| H | -0.448267 | -5.436088 | 4.240303  | H | -0.500938 | -4.963429 | 4.459726  |
| H | 1.305543  | -7.441548 | 3.847783  | H | -0.761928 | -4.661956 | 2.729113  |
| H | 2.343940  | -8.740381 | 1.984043  | H | -1.401361 | -6.134810 | 3.497979  |
| H | 2.526014  | -7.697497 | -0.279666 | H | 0.451296  | -7.738222 | 4.577668  |
| C | 1.656660  | -5.173299 | -0.990087 | H | 2.608251  | -8.855497 | 3.982594  |
| H | 1.312377  | -4.139678 | -0.907085 | H | 4.040609  | -7.843807 | 2.198345  |
| H | 2.676147  | -5.180648 | -1.390457 | C | 3.511243  | -5.550313 | 0.783983  |
| H | 1.021564  | -5.697271 | -1.714119 | H | 2.910354  | -4.831137 | 0.221007  |
|   |           |           |           | H | 4.361586  | -5.014349 | 1.225728  |
|   |           |           |           | H | 3.923105  | -6.289934 | 0.089685  |

=== Model-1, 5P (gas-phase) ===

|    |           |           |           |
|----|-----------|-----------|-----------|
| Fe | -0.194732 | 0.733646  | -0.519964 |
| N  | -0.908979 | 0.379021  | 1.529724  |
| N  | 1.819136  | 0.287003  | 0.343845  |
| N  | 0.629677  | 0.937670  | -2.618448 |
| N  | -2.143685 | 1.052469  | -1.535375 |
| C  | 0.112388  | -0.612370 | 2.008327  |
| H  | -0.018804 | -0.774325 | 3.087270  |
| H  | -0.049089 | -1.565721 | 1.498801  |
| C  | 1.538853  | -0.129610 | 1.765028  |
| H  | 2.228065  | -0.933278 | 2.049530  |
| H  | 1.768286  | 0.726163  | 2.404671  |
| C  | 2.355342  | -0.879264 | -0.451287 |
| H  | 3.329240  | -1.143055 | -0.014202 |
| H  | 1.687153  | -1.728005 | -0.287009 |
| C  | 2.578786  | -0.619959 | -1.951205 |
| H  | 3.028098  | -1.544051 | -2.336308 |
| H  | 3.352176  | 0.140473  | -2.104013 |
| C  | 1.375407  | -0.348458 | -2.869770 |
| H  | 0.654639  | -1.162674 | -2.787103 |
| H  | 1.737333  | -0.321821 | -3.907482 |
| C  | -0.582913 | 1.026959  | -3.503060 |
| H  | -0.729191 | 2.079914  | -3.754290 |
| H  | -0.387697 | 0.505562  | -4.448604 |
| C  | -1.856203 | 0.460736  | -2.880847 |
| H  | -1.772102 | -0.618288 | -2.751720 |
| H  | -2.696893 | 0.654824  | -3.560881 |
| C  | -3.209757 | 0.238071  | -0.854809 |
| H  | -2.995869 | -0.812647 | -1.060544 |
| H  | -4.168308 | 0.480448  | -1.332712 |
| C  | -3.325691 | 0.432767  | 0.661520  |
| H  | -3.407140 | 1.492484  | 0.929509  |
| H  | -4.287821 | -0.006029 | 0.951864  |
| C  | -2.257453 | -0.283369 | 1.496662  |
| H  | -2.111252 | -1.293347 | 1.109242  |
| H  | -2.605677 | -0.375992 | 2.534088  |
| C  | -0.962316 | 1.555872  | 2.435359  |
| H  | -1.242142 | 1.237079  | 3.447422  |
| H  | 0.008079  | 2.050482  | 2.482559  |
| H  | -1.702386 | 2.273942  | 2.078797  |
| C  | 2.841136  | 1.366866  | 0.399894  |
| H  | 3.742946  | 1.003716  | 0.909311  |
| H  | 2.451409  | 2.223695  | 0.950992  |
| H  | 3.122747  | 1.691129  | -0.599144 |
| C  | 1.501939  | 2.094729  | -2.958006 |
| H  | 2.422227  | 2.071770  | -2.379901 |
| H  | 0.978871  | 3.028544  | -2.747537 |
| H  | 1.764463  | 2.071104  | -4.023656 |
| C  | -2.611787 | 2.456039  | -1.673682 |
| H  | -1.852845 | 3.069836  | -2.158877 |
| H  | -2.821941 | 2.877495  | -0.689867 |
| H  | -3.530042 | 2.491107  | -2.273746 |
| N  | 0.061178  | 2.792218  | -0.181284 |

=== Model-1, 3P (gas-phase) ===

|    |           |           |           |
|----|-----------|-----------|-----------|
| Fe | -0.197150 | 0.708902  | -0.556262 |
| N  | -0.937030 | 0.354077  | 1.388283  |
| N  | 1.721737  | 0.268120  | 0.289950  |
| N  | 0.614077  | 0.959852  | -2.548270 |
| N  | -2.081528 | 1.063155  | -1.492811 |
| C  | 0.052960  | -0.641351 | 1.928751  |
| H  | -0.130472 | -0.786627 | 3.001827  |
| H  | -0.091080 | -1.599528 | 1.423244  |
| C  | 1.467469  | -0.152861 | 1.718856  |
| H  | 2.171908  | -0.945104 | 1.994213  |
| H  | 1.685862  | 0.705448  | 2.358402  |
| C  | 2.287639  | -0.902679 | -0.483344 |
| H  | 3.253237  | -1.148113 | -0.020294 |
| H  | 1.624641  | -1.755433 | -0.323849 |
| C  | 2.537909  | -0.647024 | -1.974424 |
| H  | 2.956846  | -1.582145 | -2.366565 |
| H  | 3.334954  | 0.090518  | -2.117187 |
| C  | 1.341408  | -0.322351 | -2.875779 |
| H  | 0.610442  | -1.129224 | -2.831933 |
| H  | 1.699193  | -0.239138 | -3.910939 |
| C  | -0.572504 | 1.118202  | -3.464935 |
| H  | -0.699487 | 2.184751  | -3.661961 |
| H  | -0.356876 | 0.644859  | -4.430074 |
| C  | -1.840800 | 0.537762  | -2.878150 |
| H  | -1.771231 | -0.547224 | -2.805461 |
| H  | -2.694867 | 0.783726  | -3.522901 |
| C  | -3.198956 | 0.249891  | -0.899148 |
| H  | -2.994435 | -0.796279 | -1.133828 |
| H  | -4.123725 | 0.534558  | -1.417068 |
| C  | -3.374627 | 0.388015  | 0.608579  |
| H  | -3.505911 | 1.430578  | 0.918272  |
| H  | -4.319589 | -0.107226 | 0.861881  |
| C  | -2.280869 | -0.318869 | 1.400997  |
| H  | -2.137970 | -1.323518 | 0.999760  |
| H  | -2.583558 | -0.420040 | 2.451070  |
| C  | -1.000773 | 1.547172  | 2.279697  |
| H  | -1.310741 | 1.238724  | 3.285097  |
| H  | -0.027774 | 2.030799  | 2.347241  |
| H  | -1.723662 | 2.267236  | 1.895846  |
| C  | 2.756430  | 1.341048  | 0.365749  |
| H  | 3.633897  | 0.960013  | 0.901731  |
| H  | 2.365288  | 2.202546  | 0.905623  |
| H  | 3.075587  | 1.656746  | -0.622328 |
| C  | 1.512756  | 2.112469  | -2.853965 |
| H  | 2.446951  | 2.042711  | -2.306241 |
| H  | 1.019002  | 3.048647  | -2.595852 |
| H  | 1.745558  | 2.120472  | -3.925766 |
| C  | -2.520444 | 2.486091  | -1.559051 |
| H  | -1.760614 | 3.103690  | -2.034669 |
| H  | -2.699404 | 2.867002  | -0.553871 |



|   |           |           |           |
|---|-----------|-----------|-----------|
| H | -3.449476 | 2.561930  | -2.136608 |
| N | 0.090715  | 2.788688  | -0.175536 |
| C | 0.245372  | 3.916695  | 0.035670  |
| C | 0.439434  | 5.335568  | 0.304507  |
| H | 1.473027  | 5.621446  | 0.081610  |
| H | 0.230696  | 5.548163  | 1.358588  |
| H | -0.236834 | 5.931128  | -0.318182 |
| O | -0.459070 | -0.848254 | -0.855515 |
| O | 0.592385  | -3.498858 | 0.706837  |
| H | 0.972889  | -4.224721 | 1.291135  |
| H | 0.067931  | -3.984659 | 0.051822  |
| N | 1.546463  | -5.623529 | 2.220703  |
| C | 0.776030  | -6.148375 | 3.194573  |
| C | 1.156657  | -7.302832 | 3.884534  |
| C | 2.359682  | -7.921848 | 3.554764  |
| C | 3.148987  | -7.374862 | 2.545698  |
| C | 2.712123  | -6.218114 | 1.894756  |
| C | -0.515485 | -5.435590 | 3.517512  |
| H | -0.458625 | -4.948008 | 4.499112  |
| H | -0.727037 | -4.671408 | 2.765219  |
| H | -1.356279 | -6.136682 | 3.556235  |
| H | 0.515230  | -7.707831 | 4.661248  |
| H | 2.675373  | -8.822637 | 4.073085  |
| H | 4.088823  | -7.836851 | 2.259614  |
| C | 3.534334  | -5.575969 | 0.803319  |
| H | 2.929602  | -4.858651 | 0.242169  |
| H | 4.395544  | -5.042121 | 1.226015  |
| H | 3.929819  | -6.325779 | 0.110293  |

=== Model-1, 5RC ===

|    |           |           |           |
|----|-----------|-----------|-----------|
| Fe | 0.103924  | 1.034532  | 0.036512  |
| N  | -1.307809 | 1.150224  | 1.767856  |
| N  | 1.681890  | 1.306892  | 1.633052  |
| N  | 1.616187  | 0.202502  | -1.393017 |
| N  | -1.377609 | 0.041856  | -1.346288 |
| C  | -0.423680 | 0.817724  | 2.925038  |
| H  | -0.934895 | 1.049664  | 3.870423  |
| H  | -0.248688 | -0.260556 | 2.900601  |
| C  | 0.898211  | 1.569873  | 2.880419  |
| H  | 1.496595  | 1.297592  | 3.760908  |
| H  | 0.724428  | 2.646623  | 2.938716  |
| C  | 2.424444  | 0.011963  | 1.772488  |
| H  | 3.135766  | 0.112574  | 2.606098  |
| H  | 1.701355  | -0.759245 | 2.053864  |
| C  | 3.192579  | -0.455443 | 0.529736  |
| H  | 3.745117  | -1.349788 | 0.843126  |
| H  | 3.963860  | 0.266519  | 0.245761  |
| C  | 2.364276  | -0.889461 | -0.686125 |
| H  | 1.634368  | -1.640678 | -0.368502 |
| H  | 3.035615  | -1.368110 | -1.414498 |
| C  | 0.803031  | -0.385039 | -2.505440 |
| H  | 0.630166  | 0.405870  | -3.238121 |
| H  | 1.381292  | -1.167975 | -3.014575 |
| C  | -0.521103 | -0.968437 | -2.034618 |
| H  | -0.345784 | -1.778524 | -1.323705 |
| H  | -1.051546 | -1.391342 | -2.900173 |
| C  | -2.510329 | -0.677669 | -0.682522 |
| H  | -2.106163 | -1.598790 | -0.254202 |
| H  | -3.235008 | -0.965485 | -1.457728 |
| C  | -3.220021 | 0.102003  | 0.426271  |
| H  | -3.532740 | 1.096110  | 0.089347  |
| H  | -4.149360 | -0.438066 | 0.643110  |
| C  | -2.436645 | 0.167081  | 1.739701  |
| H  | -2.012202 | -0.819833 | 1.942713  |
| H  | -3.116902 | 0.406863  | 2.569285  |
| C  | -1.860748 | 2.522559  | 1.913695  |
| H  | -2.440109 | 2.601942  | 2.843784  |
| H  | -1.059713 | 3.261466  | 1.930466  |
| H  | -2.513208 | 2.752883  | 1.070786  |
| C  | 2.637010  | 2.433387  | 1.473539  |
| H  | 3.274314  | 2.525096  | 2.363844  |
| H  | 2.083407  | 3.363209  | 1.332663  |
| H  | 3.277664  | 2.281815  | 0.607418  |
| C  | 2.564491  | 1.167169  | -2.008365 |
| H  | 3.211255  | 1.611995  | -1.255837 |
| H  | 2.003473  | 1.966407  | -2.494958 |
| H  | 3.193601  | 0.662438  | -2.754046 |
| C  | -1.927996 | 1.017143  | -2.321828 |

|   |           |           |           |
|---|-----------|-----------|-----------|
| H | -1.127438 | 1.575693  | -2.807117 |
| H | -2.570847 | 1.732641  | -1.806977 |
| H | -2.518962 | 0.498553  | -3.089550 |
| N | 0.102074  | 3.051985  | -0.678341 |
| C | 0.074827  | 4.141817  | -1.067748 |
| C | 0.041035  | 5.511246  | -1.554574 |
| H | 1.045462  | 5.813708  | -1.865375 |
| H | -0.306585 | 6.176323  | -0.758662 |
| H | -0.638032 | 5.581887  | -2.409226 |
| O | -0.217389 | -2.970124 | 0.835613  |
| O | 0.067210  | -2.680199 | 2.231696  |
| H | 0.212441  | -3.881459 | 0.727591  |
| H | -0.726935 | -3.037382 | 2.671055  |
| N | 0.798996  | -5.499334 | 0.537717  |
| C | 1.952669  | -5.911321 | 1.100039  |
| C | 2.369358  | -7.243148 | 1.007947  |
| C | 1.572152  | -8.155524 | 0.319642  |
| C | 0.381539  | -7.718730 | -0.257349 |
| C | 0.021171  | -6.373607 | -0.130898 |
| C | 2.770773  | -4.869195 | 1.819046  |
| H | 3.284458  | -4.220252 | 1.097617  |
| H | 2.126439  | -4.229981 | 2.430377  |
| H | 3.531017  | -5.329942 | 2.455566  |
| H | 3.299511  | -7.553187 | 1.473051  |
| H | 1.872610  | -9.196342 | 0.238858  |
| H | -0.265057 | -8.404862 | -0.794725 |
| C | -1.244076 | -5.829063 | -0.744968 |
| H | -1.740364 | -5.136280 | -0.058301 |
| H | -1.017399 | -5.271935 | -1.663195 |
| H | -1.938732 | -6.632446 | -1.004171 |

==== Model-1, 3RC ====

|    |           |           |           |
|----|-----------|-----------|-----------|
| Fe | 0.105190  | 0.914503  | 0.073492  |
| N  | -1.237439 | 1.137059  | 1.722196  |
| N  | 1.630485  | 1.257645  | 1.535794  |
| N  | 1.497745  | 0.230623  | -1.401297 |
| N  | -1.370787 | 0.109162  | -1.236704 |
| C  | -0.391487 | 0.871468  | 2.926687  |
| H  | -0.917930 | 1.184006  | 3.838715  |
| H  | -0.239048 | -0.208336 | 2.983776  |
| C  | 0.930559  | 1.592430  | 2.817562  |
| H  | 1.571772  | 1.340143  | 3.671829  |
| H  | 0.782003  | 2.673781  | 2.838470  |
| C  | 2.343908  | -0.056836 | 1.693218  |
| H  | 3.059391  | 0.041003  | 2.521650  |
| H  | 1.600836  | -0.804039 | 1.986296  |
| C  | 3.092679  | -0.551441 | 0.452384  |
| H  | 3.590998  | -1.480235 | 0.755275  |
| H  | 3.904686  | 0.129453  | 0.181717  |
| C  | 2.240192  | -0.914223 | -0.767018 |
| H  | 1.502835  | -1.667859 | -0.474410 |
| H  | 2.890528  | -1.361118 | -1.531878 |
| C  | 0.685841  | -0.288458 | -2.549693 |
| H  | 0.507940  | 0.545107  | -3.231641 |
| H  | 1.260328  | -1.039991 | -3.106270 |
| C  | -0.621946 | -0.876827 | -2.076199 |
| H  | -0.447033 | -1.759324 | -1.457641 |
| H  | -1.231279 | -1.183992 | -2.936909 |
| C  | -2.502062 | -0.647538 | -0.603045 |
| H  | -2.084240 | -1.575366 | -0.203913 |
| H  | -3.210000 | -0.915706 | -1.398887 |
| C  | -3.225415 | 0.083152  | 0.519778  |
| H  | -3.607266 | 1.059103  | 0.204693  |
| H  | -4.111695 | -0.512862 | 0.767398  |
| C  | -2.384934 | 0.173944  | 1.785749  |
| H  | -1.963577 | -0.812005 | 1.997797  |
| H  | -3.012562 | 0.457463  | 2.641320  |
| C  | -1.778731 | 2.524781  | 1.775973  |
| H  | -2.403283 | 2.649733  | 2.669729  |
| H  | -0.968348 | 3.250721  | 1.800393  |
| H  | -2.382349 | 2.724395  | 0.890596  |
| C  | 2.620391  | 2.351994  | 1.326253  |
| H  | 3.250080  | 2.456754  | 2.219013  |
| H  | 2.092738  | 3.288634  | 1.146929  |
| H  | 3.265701  | 2.148559  | 0.478295  |
| C  | 2.463920  | 1.196189  | -1.995033 |
| H  | 3.165229  | 1.561610  | -1.252657 |
| H  | 1.920921  | 2.046103  | -2.408221 |

|   |           |           |           |
|---|-----------|-----------|-----------|
| H | 3.033108  | 0.705576  | -2.794965 |
| C | -1.947399 | 1.179305  | -2.100269 |
| H | -1.161306 | 1.718044  | -2.625991 |
| H | -2.495029 | 1.895828  | -1.488315 |
| H | -2.633975 | 0.737535  | -2.833656 |
| N | 0.114098  | 3.031909  | -0.651914 |
| C | 0.123614  | 4.129989  | -1.020600 |
| C | 0.137681  | 5.510683  | -1.481065 |
| H | 1.170291  | 5.866571  | -1.543243 |
| H | -0.417744 | 6.139484  | -0.779159 |
| H | -0.325884 | 5.576346  | -2.469603 |
| O | -0.222594 | -3.024447 | 0.697858  |
| O | -0.067205 | -2.691361 | 2.104666  |
| H | 0.240273  | -3.924713 | 0.649859  |
| H | -0.877344 | -3.076946 | 2.487428  |
| N | 0.868722  | -5.537256 | 0.548309  |
| C | 1.944849  | -5.937193 | 1.254427  |
| C | 2.366893  | -7.270566 | 1.241181  |
| C | 1.657729  | -8.197227 | 0.479904  |
| C | 0.548061  | -7.772581 | -0.248013 |
| C | 0.177534  | -6.425495 | -0.193694 |
| C | 2.674889  | -4.880335 | 2.043106  |
| H | 3.275332  | -4.250981 | 1.373213  |
| H | 1.965186  | -4.224812 | 2.556973  |
| H | 3.350365  | -5.327520 | 2.777294  |
| H | 3.232981  | -7.570273 | 1.822311  |
| H | 1.963573  | -9.239367 | 0.457953  |
| H | -0.028131 | -8.469926 | -0.847452 |
| C | -1.000359 | -5.893226 | -0.970649 |
| H | -1.593507 | -5.209766 | -0.355017 |
| H | -0.658305 | -5.328340 | -1.847368 |
| H | -1.643891 | -6.703218 | -1.323759 |

=== Model-1, 5TS1 ===

|    |           |           |           |
|----|-----------|-----------|-----------|
| Fe | 0.201967  | 0.729490  | 0.119573  |
| N  | -1.308832 | 0.972928  | 1.724972  |
| N  | 1.667333  | 1.328124  | 1.714256  |
| N  | 1.832362  | 0.223263  | -1.337255 |
| N  | -1.150280 | -0.149153 | -1.403559 |
| C  | -0.468941 | 0.690907  | 2.927552  |
| H  | -1.032689 | 0.917656  | 3.845372  |
| H  | -0.234036 | -0.374132 | 2.921628  |
| C  | 0.825386  | 1.499439  | 2.943927  |
| H  | 1.405457  | 1.218758  | 3.833716  |
| H  | 0.603879  | 2.564416  | 3.040405  |
| C  | 2.596494  | 0.163232  | 1.868097  |
| H  | 3.285253  | 0.380928  | 2.699417  |
| H  | 1.991469  | -0.698130 | 2.152257  |
| C  | 3.441282  | -0.181898 | 0.628881  |
| H  | 4.119850  | -0.980188 | 0.955170  |
| H  | 4.101651  | 0.649428  | 0.362597  |
| C  | 2.724774  | -0.738881 | -0.613670 |
| H  | 2.096480  | -1.576086 | -0.305828 |
| H  | 3.486779  | -1.102243 | -1.320440 |
| C  | 1.113161  | -0.464630 | -2.459036 |
| H  | 0.938642  | 0.279651  | -3.238555 |
| H  | 1.760616  | -1.234740 | -2.899755 |
| C  | -0.210894 | -1.109778 | -2.053796 |
| H  | -0.029022 | -1.914132 | -1.341271 |
| H  | -0.672618 | -1.548591 | -2.951333 |
| C  | -2.288729 | -0.900961 | -0.789157 |
| H  | -1.857456 | -1.778025 | -0.308939 |
| H  | -2.958920 | -1.236414 | -1.594370 |
| C  | -3.092089 | -0.130174 | 0.265761  |
| H  | -3.406188 | 0.853029  | -0.101181 |
| H  | -4.021194 | -0.692577 | 0.419313  |
| C  | -2.413204 | -0.029976 | 1.638812  |
| H  | -1.986639 | -1.002955 | 1.886465  |
| H  | -3.163473 | 0.212052  | 2.405773  |
| C  | -1.896889 | 2.332418  | 1.809405  |
| H  | -2.528922 | 2.418872  | 2.704587  |
| H  | -1.113823 | 3.088523  | 1.853804  |
| H  | -2.505223 | 2.531913  | 0.926531  |
| C  | 2.444626  | 2.580802  | 1.538544  |
| H  | 3.066411  | 2.773941  | 2.424232  |
| H  | 1.762360  | 3.419186  | 1.393030  |
| H  | 3.096066  | 2.517289  | 0.669647  |
| C  | 2.640015  | 1.314293  | -1.939687 |

|   |           |           |           |
|---|-----------|-----------|-----------|
| H | 3.217774  | 1.837164  | -1.180423 |
| H | 1.982169  | 2.036147  | -2.425524 |
| H | 3.338239  | 0.907927  | -2.684905 |
| C | -1.684073 | 0.811201  | -2.399990 |
| H | -0.879940 | 1.395261  | -2.846727 |
| H | -2.371841 | 1.505367  | -1.915076 |
| H | -2.221741 | 0.275791  | -3.195259 |
| N | 0.011359  | 2.808431  | -0.640585 |
| C | -0.095136 | 3.890260  | -1.039474 |
| C | -0.229830 | 5.250321  | -1.538957 |
| H | 0.758188  | 5.652749  | -1.780971 |
| H | -0.697677 | 5.879382  | -0.776111 |
| H | -0.850281 | 5.253115  | -2.439788 |
| O | 0.200652  | -1.926586 | 0.810446  |
| O | 0.458288  | -2.256917 | 2.231083  |
| H | 0.469290  | -3.483229 | 0.441015  |
| H | -0.400968 | -2.615524 | 2.515225  |
| N | 0.628564  | -4.551236 | 0.337846  |
| C | 1.846272  | -5.058526 | 0.659009  |
| C | 2.061280  | -6.426491 | 0.515101  |
| C | 1.033112  | -7.242215 | 0.049510  |
| C | -0.206156 | -6.684299 | -0.260245 |
| C | -0.401251 | -5.315709 | -0.108945 |
| C | 2.897121  | -4.114874 | 1.158481  |
| H | 3.320151  | -3.538825 | 0.327346  |
| H | 2.462094  | -3.413952 | 1.875952  |
| H | 3.709877  | -4.671112 | 1.629890  |
| H | 3.029537  | -6.838494 | 0.773982  |
| H | 1.193287  | -8.309598 | -0.064113 |
| H | -1.024967 | -7.300081 | -0.612928 |
| C | -1.705791 | -4.641430 | -0.413526 |
| H | -2.030315 | -4.015394 | 0.422887  |
| H | -1.616341 | -4.001917 | -1.298246 |
| H | -2.478025 | -5.386877 | -0.612173 |

=== Model-1, 3TS1 ===

|    |           |           |           |
|----|-----------|-----------|-----------|
| Fe | 0.238408  | 0.541099  | 0.189905  |
| N  | -1.244089 | 0.864995  | 1.643199  |
| N  | 1.579165  | 1.237799  | 1.689763  |
| N  | 1.778151  | 0.188166  | -1.249599 |
| N  | -1.057903 | -0.170914 | -1.309815 |
| C  | -0.505526 | 0.617175  | 2.918656  |
| H  | -1.134861 | 0.884302  | 3.779825  |
| H  | -0.280960 | -0.448720 | 2.963958  |
| C  | 0.778840  | 1.417511  | 2.952867  |
| H  | 1.381350  | 1.125126  | 3.821064  |
| H  | 0.565740  | 2.481927  | 3.063203  |
| C  | 2.580696  | 0.133818  | 1.888932  |
| H  | 3.247390  | 0.428349  | 2.712251  |
| H  | 2.024025  | -0.749115 | 2.204531  |
| C  | 3.444237  | -0.197453 | 0.665670  |
| H  | 4.131602  | -0.987036 | 0.994176  |
| H  | 4.092637  | 0.644077  | 0.402820  |
| C  | 2.731803  | -0.755253 | -0.572049 |
| H  | 2.143006  | -1.625541 | -0.279381 |
| H  | 3.489988  | -1.061227 | -1.306891 |
| C  | 1.130757  | -0.508715 | -2.415388 |
| H  | 0.977475  | 0.231249  | -3.202364 |
| H  | 1.810183  | -1.266438 | -2.823316 |
| C  | -0.188268 | -1.146271 | -2.032662 |
| H  | -0.023593 | -1.987540 | -1.359515 |
| H  | -0.696724 | -1.519348 | -2.933273 |
| C  | -2.258946 | -0.915475 | -0.812578 |
| H  | -1.889460 | -1.839832 | -0.371057 |
| H  | -2.883432 | -1.170562 | -1.679764 |
| C  | -3.090632 | -0.184704 | 0.236742  |
| H  | -3.436799 | 0.791607  | -0.117171 |
| H  | -3.999872 | -0.778938 | 0.387833  |
| C  | -2.395422 | -0.088828 | 1.592346  |
| H  | -2.004201 | -1.073229 | 1.853947  |
| H  | -3.116555 | 0.207091  | 2.366679  |
| C  | -1.776249 | 2.257088  | 1.625941  |
| H  | -2.431403 | 2.416826  | 2.492361  |
| H  | -0.963161 | 2.979438  | 1.649361  |
| H  | -2.345223 | 2.429250  | 0.712965  |
| C  | 2.294609  | 2.528491  | 1.475428  |
| H  | 2.865792  | 2.787945  | 2.376117  |
| H  | 1.572108  | 3.315194  | 1.261968  |

|   |           |           |           |   |           |           |           |
|---|-----------|-----------|-----------|---|-----------|-----------|-----------|
| H | 2.985801  | 2.463367  | 0.641564  | H | 3.031876  | 2.916125  | 2.132545  |
| C | 2.530080  | 1.336311  | -1.832260 | H | 1.686034  | 3.456229  | 1.097192  |
| H | 3.144227  | 1.829007  | -1.085217 | H | 2.973050  | 2.453797  | 0.423185  |
| H | 1.827769  | 2.064717  | -2.236080 | C | 2.312969  | 0.939048  | -1.990274 |
| H | 3.190077  | 0.977907  | -2.632891 | H | 2.893272  | 1.573925  | -1.325767 |
| C | -1.515203 | 0.899001  | -2.240027 | H | 1.608795  | 1.565659  | -2.535588 |
| H | -0.673385 | 1.486818  | -2.599765 | H | 2.996208  | 0.461079  | -2.703456 |
| H | -2.191109 | 1.575618  | -1.717638 | C | -1.838722 | 0.657509  | -2.322607 |
| H | -2.043491 | 0.454127  | -3.093786 | H | -0.978881 | 1.077236  | -2.843401 |
| N | 0.079834  | 3.274092  | -0.795569 | H | -2.425585 | 1.480952  | -1.916476 |
| C | -0.084633 | 4.359040  | -1.172950 | H | -2.454021 | 0.101820  | -3.042185 |
| C | -0.292042 | 5.723494  | -1.645172 | N | -0.059800 | 2.573879  | -0.787173 |
| H | 0.634697  | 6.114379  | -2.075071 | C | -0.126435 | 3.625511  | -1.266725 |
| H | -0.596142 | 6.363218  | -0.811571 | C | -0.208321 | 4.945365  | -1.869861 |
| H | -1.074205 | 5.738305  | -2.409750 | H | -1.048700 | 4.977785  | -2.569465 |
| O | 0.224401  | -2.002547 | 0.830134  | H | 0.719613  | 5.160290  | -2.408014 |
| O | 0.523207  | -2.316655 | 2.246454  | H | -0.356861 | 5.697203  | -1.089158 |
| H | 0.483270  | -3.544548 | 0.462216  | O | -0.106309 | -1.164104 | 1.107734  |
| H | -0.324058 | -2.681649 | 2.556714  | O | 0.298414  | -1.949087 | -2.703337 |
| N | 0.632675  | -4.616608 | 0.356112  | H | 0.368247  | -1.902415 | 0.696744  |
| C | 1.860737  | -5.130963 | 0.620626  | H | -0.537715 | -2.503314 | 2.786061  |
| C | 2.060219  | -6.500516 | 0.470344  | N | -1.789215 | -3.734602 | 3.268619  |
| C | 1.005127  | -7.310680 | 0.057500  | C | -1.857484 | -4.897814 | 2.591182  |
| C | -0.244485 | -6.745961 | -0.192152 | C | -2.699261 | -5.935637 | 3.003684  |
| C | -0.422562 | -5.375437 | -0.035892 | C | -3.481167 | -5.758559 | 4.142985  |
| C | 2.938412  | -4.191935 | 1.069938  | C | -3.396870 | -4.557235 | 4.843309  |
| H | 3.330469  | -3.622587 | 0.219182  | C | -2.534445 | -3.559080 | 4.378114  |
| H | 2.539014  | -3.485214 | 1.802428  | C | -0.987075 | -5.028006 | 1.366665  |
| H | 3.766782  | -4.751019 | 1.509809  | H | -1.412931 | -4.464262 | 0.526774  |
| H | 3.037121  | -6.918324 | 0.683465  | H | 0.012475  | -4.627078 | 1.562357  |
| H | 1.152795  | -8.379396 | -0.060492 | H | -0.893754 | -6.071249 | 1.053360  |
| H | -1.083774 | -7.357864 | -0.501005 | H | -2.731155 | -6.863455 | 2.441727  |
| C | -1.734835 | -4.690555 | -0.278597 | H | -4.140544 | -6.550621 | 4.486408  |
| H | -1.971821 | -3.996982 | 0.532813  | H | -3.982800 | -4.391199 | 5.741474  |
| H | -1.707392 | -4.119921 | -1.213776 | C | -2.399837 | -2.238799 | 5.093917  |
| H | -2.537082 | -5.426708 | -0.357641 | H | -1.348808 | -1.940686 | 5.159766  |
|   |           |           |           | H | -2.932199 | -1.447003 | 4.552204  |
|   |           |           |           | H | -2.816682 | -2.290433 | 6.103282  |

=== Model-1, 5TShooh ===

|    |           |           |           |
|----|-----------|-----------|-----------|
| Fe | 0.044874  | 0.617003  | 0.273679  |
| N  | -1.385496 | 1.289281  | 1.793983  |
| N  | 1.588267  | 1.417168  | 1.675557  |
| N  | 1.572212  | -0.103886 | -1.221770 |
| N  | -1.399161 | -0.246715 | -1.228123 |
| C  | -0.555309 | 1.079060  | 3.026076  |
| H  | -1.079524 | 1.487557  | 3.901001  |
| H  | -0.432116 | 0.005420  | 3.169063  |
| C  | 0.815221  | 1.751770  | 2.927291  |
| H  | 1.405336  | 1.474006  | 3.809062  |
| H  | 0.703114  | 2.836981  | 2.956831  |
| C  | 2.530613  | 0.269644  | 1.917798  |
| H  | 3.269955  | 0.595964  | 2.663090  |
| H  | 1.954740  | -0.542657 | 2.361092  |
| C  | 3.308511  | -0.232046 | 0.685939  |
| H  | 4.008529  | -0.981923 | 1.074500  |
| H  | 3.947310  | 0.560978  | 0.286591  |
| C  | 2.569338  | -0.938084 | -0.466026 |
| H  | 2.061186  | -1.829976 | -0.094240 |
| H  | 3.323006  | -1.295576 | -1.180984 |
| C  | 0.811709  | -0.932136 | -2.231890 |
| H  | 0.736123  | -0.337452 | -3.142963 |
| H  | 1.392186  | -1.824937 | -2.490776 |
| C  | -0.593250 | -1.367121 | -1.800625 |
| H  | -0.550969 | -2.165024 | -1.059458 |
| H  | -1.098721 | -1.789018 | -2.680674 |
| C  | -2.609981 | -0.782192 | -0.519811 |
| H  | -2.305203 | -1.676717 | 0.024979  |
| H  | -3.341075 | -1.087903 | -1.280221 |
| C  | -3.282797 | 0.190196  | 0.461672  |
| H  | -3.498639 | 1.151461  | -0.016525 |
| H  | -4.263788 | -0.244192 | 0.688001  |
| C  | -2.583056 | 0.384829  | 1.816081  |
| H  | -2.255462 | -0.584786 | 2.193326  |
| H  | -3.301846 | 0.795877  | 2.537659  |
| C  | -1.841001 | 2.702136  | 1.718557  |
| H  | -2.437057 | 2.946815  | 2.607151  |
| H  | -0.988727 | 3.378241  | 1.666990  |
| H  | -2.451094 | 2.855704  | 0.828669  |
| C  | 2.365976  | 2.631208  | 1.307628  |

=== Model-1, 3TShooh ===

|    |           |           |           |
|----|-----------|-----------|-----------|
| Fe | 0.025404  | 0.705792  | 0.323780  |
| N  | -1.251707 | 1.570244  | 1.777700  |
| N  | 1.594087  | 1.287963  | 1.656719  |
| N  | 1.374929  | -0.189960 | -1.124035 |
| N  | -1.499667 | 0.077383  | -1.042711 |
| C  | -0.497136 | 1.316005  | 3.049634  |
| H  | -0.985066 | 1.844487  | 3.879723  |
| H  | -0.540857 | 0.245060  | 3.247751  |
| C  | 0.936816  | 1.785254  | 2.924679  |
| H  | 1.515104  | 1.451728  | 3.793147  |
| H  | 0.985988  | 2.874959  | 2.913342  |
| C  | 2.378230  | 0.034910  | 1.949845  |
| H  | 3.142772  | 0.294646  | 2.693919  |
| H  | 1.695705  | -0.677141 | 2.413926  |
| C  | 3.097941  | -0.594870 | 0.748178  |
| H  | 3.663176  | -1.443143 | 1.152370  |
| H  | 3.859139  | 0.088538  | 0.360947  |
| C  | 2.270091  | -1.167665 | -0.410801 |
| H  | 1.663560  | -2.010985 | -0.073614 |
| H  | 2.965533  | -1.585664 | -1.150147 |
| C  | 0.510863  | -0.908403 | -2.138747 |
| H  | 0.491107  | -0.296117 | -3.040767 |
| H  | 0.979315  | -1.858818 | -2.415594 |
| C  | -0.906431 | -1.155828 | -1.653395 |
| H  | -0.940024 | -1.943404 | -0.902533 |
| H  | -1.521867 | -1.485807 | -2.501017 |
| C  | -2.785284 | -0.309143 | -0.369879 |
| H  | -2.597738 | -1.227294 | 0.187762  |
| H  | -3.516938 | -0.535799 | -1.155840 |
| C  | -3.355399 | 0.739872  | 0.581846  |
| H  | -3.500533 | 1.705857  | 0.087432  |
| H  | -4.361565 | 0.398879  | 0.852806  |
| C  | -2.577203 | 0.876336  | 1.888649  |
| H  | -2.386417 | -0.115486 | 2.299779  |
| H  | -3.177921 | 1.430770  | 2.621355  |
| C  | -1.490945 | 3.032327  | 1.612756  |
| H  | -2.058908 | 3.406567  | 2.473122  |

|   |           |           |           |   |           |           |           |
|---|-----------|-----------|-----------|---|-----------|-----------|-----------|
| H | -0.548938 | 3.572008  | 1.546066  | C | -1.634763 | 2.456030  | 2.059324  |
| H | -2.057768 | 3.222530  | 0.702660  | H | -2.171248 | 2.548124  | 3.015147  |
| C | 2.533455  | 2.367301  | 1.231517  | H | -0.713723 | 3.035828  | 2.111840  |
| H | 3.249369  | 2.564086  | 2.038659  | H | -2.251395 | 2.881302  | 1.266310  |
| H | 1.974857  | 3.276537  | 1.017716  | C | 2.602474  | 1.994104  | 1.381941  |
| H | 3.087072  | 2.085407  | 0.342265  | H | 3.323908  | 1.987307  | 2.212240  |
| C | 2.251603  | 0.727163  | -1.918730 | H | 2.042403  | 2.929406  | 1.403876  |
| H | 2.984856  | 1.217808  | -1.286190 | H | 3.157666  | 1.954886  | 0.446964  |
| H | 1.645948  | 1.486310  | -2.407441 | C | 2.270270  | 1.204373  | -2.244804 |
| H | 2.787613  | 0.144452  | -2.677244 | H | 2.983793  | 1.531969  | -1.491422 |
| C | -1.812502 | 1.056285  | -2.124545 | H | 1.677143  | 2.067421  | -2.548710 |
| H | -0.908346 | 1.347866  | -2.653515 | H | 2.833196  | 0.832023  | -3.113237 |
| H | -2.262281 | 1.952921  | -1.701999 | C | -2.014800 | 1.497138  | -2.330787 |
| H | -2.514613 | 0.602909  | -2.834576 | H | -1.134767 | 1.968708  | -2.768375 |
| N | 0.235096  | 2.792805  | -0.853641 | H | -2.506621 | 2.235354  | -1.695729 |
| C | 0.319702  | 3.837951  | -1.347067 | H | -2.704180 | 1.209248  | -3.138767 |
| C | 0.423767  | 5.150461  | -1.967285 | N | 0.116335  | 2.853130  | -0.490090 |
| H | 1.447796  | 5.523220  | -1.873124 | C | 0.178291  | 3.980840  | -0.747741 |
| H | -0.259959 | 5.846647  | -1.472815 | C | 0.256617  | 5.398373  | -1.073210 |
| H | 0.161666  | 5.079880  | -3.026971 | H | 1.299559  | 5.681067  | -1.243338 |
| O | -0.344940 | -1.082221 | 1.219390  | H | -0.145217 | 5.991386  | -0.246562 |
| O | -0.397555 | -1.795400 | 2.854721  | H | -0.323066 | 5.603716  | -1.977841 |
| H | 0.227595  | -1.815207 | 0.948746  | O | -0.328608 | -1.475707 | 0.248883  |
| H | -1.143228 | -2.440842 | 2.673318  | O | -0.181460 | -2.304612 | 1.472693  |
| N | -2.306009 | -3.867739 | 2.636592  | H | 0.631863  | -3.808135 | 1.099711  |
| C | -1.854768 | -5.034205 | 2.133856  | H | -1.101828 | -2.590595 | 1.617755  |
| C | -2.604965 | -6.210906 | 2.228648  | N | 1.090577  | -4.730108 | 0.908940  |
| C | -3.847036 | -6.170721 | 2.858332  | C | 2.023848  | -5.172169 | 1.790820  |
| C | -4.303783 | -4.962693 | 3.380547  | C | 2.628340  | -6.397947 | 1.541225  |
| C | -3.503540 | -3.822494 | 3.252876  | C | 2.269607  | -7.123870 | 0.404204  |
| C | -0.506997 | -5.011938 | 1.456837  | C | 1.303717  | -6.628499 | -0.469806 |
| H | -0.594341 | -4.615748 | 0.436681  | C | 0.698000  | -5.405354 | -0.199547 |
| H | 0.186948  | -4.368805 | 2.006430  | C | 2.353666  | -4.294416 | 2.961088  |
| H | -0.080026 | -6.016002 | 1.385432  | H | 3.057671  | -3.508683 | 2.660768  |
| H | -2.214468 | -7.137570 | 1.820397  | H | 1.459310  | -3.807661 | 3.360654  |
| H | -4.447401 | -7.071532 | 2.949002  | H | 2.822542  | -4.881316 | 3.753298  |
| H | -5.261892 | -4.898752 | 3.886300  | H | 3.373634  | -6.772755 | 2.232575  |
| C | -3.947062 | -2.485395 | 3.790509  | H | 2.742816  | -8.079492 | 0.202608  |
| H | -3.102796 | -1.949448 | 4.234835  | H | 1.009719  | -7.182043 | -1.353749 |
| H | -4.350387 | -1.859098 | 2.984225  | C | -0.388335 | -4.799631 | -1.036218 |
| H | -4.730576 | -2.599245 | 4.544707  | H | -0.437234 | -3.715494 | -0.900569 |
|   |           |           |           | H | -0.227895 | -5.028854 | -2.092665 |
|   |           |           |           | H | -1.358353 | -5.223934 | -0.747957 |

=== Model-1, 5Int ===

|    |           |           |           |
|----|-----------|-----------|-----------|
| Fe | -0.024644 | 0.604960  | 0.020791  |
| N  | -1.335982 | 1.035555  | 1.769090  |
| N  | 1.668600  | 0.847697  | 1.492262  |
| N  | 1.379919  | 0.147185  | -1.706614 |
| N  | -1.628834 | 0.314318  | -1.531130 |
| C  | -0.477357 | 0.455186  | 2.843923  |
| H  | -0.897400 | 0.688996  | 3.834810  |
| H  | -0.479646 | -0.626075 | 2.719845  |
| C  | 0.966389  | 0.973269  | 2.812960  |
| H  | 1.536441  | 0.447558  | 3.591827  |
| H  | 0.979041  | 2.031408  | 3.083512  |
| C  | 2.428220  | -0.436105 | 1.388390  |
| H  | 3.230351  | -0.427841 | 2.144623  |
| H  | 1.740537  | -1.240132 | 1.644413  |
| C  | 3.084086  | -0.721748 | 0.020240  |
| H  | 3.667245  | -1.639841 | 0.169422  |
| H  | 3.831962  | 0.044266  | -0.208623 |
| C  | 2.204231  | -1.003296 | -1.215862 |
| H  | 1.511100  | -1.810490 | -0.984946 |
| H  | 2.867667  | -1.329232 | -2.032902 |
| C  | 0.462802  | -0.268401 | -2.821388 |
| H  | 0.392452  | 0.575752  | -3.511014 |
| H  | 0.915194  | -1.093977 | -3.387998 |
| C  | -0.946010 | -0.694116 | -2.391477 |
| H  | -0.894510 | -1.616008 | -1.815143 |
| H  | -1.533926 | -0.884237 | -3.303799 |
| C  | -2.847520 | -0.278201 | -0.902975 |
| H  | -2.595467 | -1.297729 | -0.608181 |
| H  | -3.643841 | -0.331715 | -1.661336 |
| C  | -3.382676 | 0.475595  | 0.327719  |
| H  | -3.514933 | 1.541433  | 0.110965  |
| H  | -4.395024 | 0.090905  | 0.503916  |
| C  | -2.616016 | 0.274260  | 1.647302  |
| H  | -2.380478 | -0.785019 | 1.757676  |
| H  | -3.270269 | 0.552079  | 2.487645  |

=== Model-1, 3Int ===

|    |           |           |           |
|----|-----------|-----------|-----------|
| Fe | -0.089705 | 0.102829  | 0.099799  |
| N  | -1.304679 | 0.688571  | 1.708583  |
| N  | 1.514228  | 0.492734  | 1.428429  |
| N  | 1.183219  | -0.254491 | -1.584574 |
| N  | -1.644524 | -0.060935 | -1.298166 |
| C  | -0.519174 | 0.191667  | 2.876765  |
| H  | -0.973204 | 0.536155  | 3.817884  |
| H  | -0.552971 | -0.896652 | 2.849084  |
| C  | 0.920199  | 0.669372  | 2.803279  |
| H  | 1.527720  | 0.137054  | 3.544157  |
| H  | 0.977519  | 1.729335  | 3.056885  |
| C  | 2.376516  | -0.735642 | 1.388744  |
| H  | 3.184190  | -0.611598 | 2.125443  |
| H  | 1.749740  | -1.567123 | 1.708913  |
| C  | 3.018249  | -1.051530 | 0.027599  |
| H  | 3.616177  | -1.957872 | 0.187551  |
| H  | 3.749174  | -0.281346 | -0.238977 |
| C  | 2.101228  | -1.367352 | -1.164654 |
| H  | 1.461702  | -2.213067 | -0.913457 |
| H  | 2.732620  | -1.637254 | -2.023928 |
| C  | 0.291357  | -0.711927 | -2.711374 |
| H  | 0.231676  | 0.098652  | -3.439930 |
| H  | 0.749555  | -1.562996 | -3.228204 |
| C  | -1.102459 | -1.086714 | -2.238320 |
| H  | -1.078447 | -2.027892 | -1.690308 |
| H  | -1.767038 | -1.199819 | -3.107665 |
| C  | -2.927015 | -0.589068 | -0.737601 |
| H  | -2.733138 | -1.619578 | -0.434848 |
| H  | -3.675182 | -0.602432 | -1.543002 |
| C  | -3.476557 | 0.180076  | 0.463321  |
| H  | -3.662830 | 1.231989  | 0.223775  |
| H  | -4.463853 | -0.244608 | 0.682022  |
| C  | -2.645972 | 0.029035  | 1.737750  |

|   |           |           |           |   |           |           |           |
|---|-----------|-----------|-----------|---|-----------|-----------|-----------|
| H | -2.475580 | -1.033820 | 1.919190  | H | -4.621836 | 1.354449  | 0.282362  |
| H | -3.206680 | 0.426321  | 2.595902  | C | -2.901537 | 1.562321  | 1.501367  |
| C | -1.482413 | 2.163725  | 1.792461  | H | -2.905517 | 0.575851  | 1.967695  |
| H | -1.971341 | 2.437063  | 2.737459  | H | -3.505551 | 2.230738  | 2.129445  |
| H | -0.520737 | 2.671138  | 1.727572  | C | -1.484151 | 3.536467  | 1.323713  |
| H | -2.098832 | 2.512273  | 0.963869  | H | -2.046953 | 4.023430  | 2.130460  |
| C | 2.349777  | 1.705214  | 1.189191  | H | -0.465018 | 3.920570  | 1.322286  |
| H | 3.030251  | 1.864827  | 2.035650  | H | -1.944288 | 3.787708  | 0.368376  |
| H | 1.708021  | 2.579592  | 1.068521  | C | 2.494603  | 2.171709  | 1.238368  |
| H | 2.952044  | 1.600184  | 0.293694  | H | 3.180222  | 2.310368  | 2.084212  |
| C | 1.982236  | 0.878096  | -2.134244 | H | 2.099191  | 3.141281  | 0.938207  |
| H | 2.784097  | 1.159727  | -1.460237 | H | 3.055588  | 1.756279  | 0.404953  |
| H | 1.339923  | 1.747788  | -2.286569 | C | 2.158996  | 0.286421  | -1.963042 |
| H | 2.435335  | 0.588354  | -3.091050 | H | 2.869244  | 0.772412  | -1.298361 |
| C | -1.910590 | 1.213660  | -2.019586 | H | 1.723598  | 1.044782  | -2.612902 |
| H | -0.982227 | 1.643243  | -2.395738 | H | 2.700251  | -0.444210 | -2.577776 |
| H | -2.362929 | 1.938364  | -1.342278 | C | -1.877122 | 1.230609  | -2.580321 |
| H | -2.594428 | 1.041544  | -2.861954 | H | -0.902922 | 1.343368  | -3.054638 |
| N | 0.448554  | 4.222658  | -0.833904 | H | -2.225707 | 2.218671  | -2.280251 |
| C | 0.524489  | 5.358304  | -1.062774 | H | -2.580871 | 0.810425  | -3.310218 |
| C | 0.619872  | 6.786385  | -1.350444 | N | 0.318151  | 2.633541  | -0.954554 |
| H | 1.662356  | 7.062780  | -1.533354 | C | 0.591156  | 3.584856  | -1.554752 |
| H | 0.243095  | 7.365173  | -0.502094 | C | 0.934130  | 4.779913  | -2.306884 |
| H | 0.027410  | 7.030183  | -2.237098 | H | 2.000903  | 4.767888  | -2.548792 |
| O | -0.372121 | -1.975707 | 0.387906  | H | 0.707536  | 5.667040  | -1.708196 |
| O | -0.230746 | -2.706063 | 1.677039  | O | 0.352089  | 4.809225  | -3.232699 |
| H | 0.603778  | -4.177936 | 1.311493  | H | -0.845055 | -0.686925 | 1.016091  |
| H | -1.148942 | -2.990216 | 1.837314  | O | -0.938630 | -1.682922 | 3.589078  |
| N | 1.113052  | -5.069002 | 1.091527  | H | -0.850122 | -1.085988 | 1.919583  |
| C | 2.097669  | -5.465789 | 1.938704  | H | -1.091955 | -2.705584 | 3.660718  |
| C | 2.773463  | -6.644355 | 1.648852  | N | -1.350601 | -4.332723 | 3.878570  |
| C | 2.430577  | -7.371993 | 0.507708  | C | -0.773321 | -5.243983 | 3.069796  |
| C | 1.410969  | -6.924673 | -0.329825 | C | -0.934839 | -6.613608 | 3.292490  |
| C | 0.735139  | -5.748195 | -0.019452 | C | -1.704566 | -7.035904 | 4.375526  |
| C | 2.400261  | -4.589783 | 3.117647  | C | -2.294410 | -6.084840 | 5.204731  |
| H | 2.946044  | -3.694054 | 2.797900  | C | -2.100012 | -4.728120 | 4.926427  |
| H | 1.482826  | -4.261641 | 3.615642  | C | 0.053249  | -4.710685 | 1.927774  |
| H | 3.020667  | -5.125999 | 3.837956  | H | -0.545014 | -4.043839 | 1.296379  |
| H | 3.561615  | -6.981424 | 2.311459  | H | 0.903886  | -4.129661 | 2.303900  |
| H | 2.959303  | -8.290592 | 0.274237  | H | 0.440812  | -5.521245 | 1.305657  |
| H | 1.129216  | -7.479511 | -1.216939 | H | -0.461274 | -7.330206 | 2.629645  |
| C | -0.407067 | -5.195836 | -0.817026 | H | -1.840818 | -8.095549 | 4.571624  |
| H | -0.489993 | -4.111996 | -0.687797 | H | -2.897599 | -6.381711 | 6.056412  |
| H | -0.280415 | -5.432990 | -1.876300 | C | -2.731478 | -3.644272 | 5.762714  |
| H | -1.347326 | -5.653510 | -0.483896 | H | -2.033376 | -2.816096 | 5.917287  |
|   |           |           |           | H | -3.615541 | -3.235991 | 5.256321  |
|   |           |           |           | H | -3.050365 | -4.028272 | 6.735177  |

=== Model-1, 5Int-ho-oh ===

|    |           |           |           |
|----|-----------|-----------|-----------|
| Fe | -0.274095 | 0.800475  | 0.158298  |
| N  | -1.487046 | 2.064723  | 1.523772  |
| N  | 1.378377  | 1.268651  | 1.632581  |
| N  | 1.082867  | -0.392631 | -1.192627 |
| N  | -1.786463 | 0.340408  | -1.394683 |
| C  | -0.840818 | 1.723908  | 2.830889  |
| H  | -1.251441 | 2.360571  | 3.626627  |
| H  | -1.092535 | 0.693417  | 3.072994  |
| C  | 0.677600  | 1.915456  | 2.802305  |
| H  | 1.097549  | 1.533716  | 3.740302  |
| H  | 0.910652  | 2.981167  | 2.767956  |
| C  | 1.940989  | -0.074170 | 2.009102  |
| H  | 2.718848  | 0.091164  | 2.767898  |
| H  | 1.144391  | -0.648476 | 2.481931  |
| C  | 2.569955  | -0.886812 | 0.861889  |
| H  | 2.987030  | -1.780376 | 1.342952  |
| H  | 3.439467  | -0.361238 | 0.455886  |
| C  | 1.687248  | -1.424457 | -0.279744 |
| H  | 0.864262  | -2.008495 | 0.130822  |
| H  | 2.308097  | -2.091512 | -0.894512 |
| C  | 0.157557  | -1.039044 | -2.194555 |
| H  | 0.290681  | -0.514393 | -3.142124 |
| H  | 0.466810  | -2.077080 | -2.365033 |
| C  | -1.320489 | -1.024595 | -1.801326 |
| H  | -1.496460 | -1.689689 | -0.958026 |
| H  | -1.911209 | -1.381641 | -2.655856 |
| C  | -3.133530 | 0.245584  | -0.738889 |
| H  | -3.123329 | -0.643392 | -0.106448 |
| H  | -3.881000 | 0.088386  | -1.527984 |
| C  | -3.544281 | 1.459567  | 0.109241  |
| H  | -3.433682 | 2.394560  | -0.450351 |

=== Model-1, 3Int-ho-oh ===

|    |           |           |           |
|----|-----------|-----------|-----------|
| Fe | -0.129610 | 0.798332  | 0.155105  |
| N  | -1.419551 | 1.898176  | 1.464247  |
| N  | 1.382507  | 1.187362  | 1.667608  |
| N  | 1.249807  | -0.240874 | -1.161886 |
| N  | -1.557144 | 0.440295  | -1.415938 |
| C  | -0.848686 | 1.537092  | 2.803357  |
| H  | -1.336654 | 2.135840  | 3.583641  |
| H  | -1.078700 | 0.491486  | 2.994635  |
| C  | 0.648198  | 1.778218  | 2.850394  |
| H  | 1.058160  | 1.365535  | 3.778429  |
| H  | 0.856755  | 2.848787  | 2.863189  |
| C  | 1.956716  | -0.157050 | 2.026429  |
| H  | 2.688121  | 0.005978  | 2.829233  |
| H  | 1.150673  | -0.764109 | 2.434470  |
| C  | 2.660170  | -0.904035 | 0.885379  |
| H  | 3.041961  | -1.829050 | 1.334471  |
| H  | 3.553699  | -0.361207 | 0.563457  |
| C  | 1.826628  | -1.350129 | -0.323245 |
| H  | 0.990477  | -1.963270 | 0.007283  |
| H  | 2.471290  | -1.952120 | -0.977635 |
| C  | 0.408050  | -0.816452 | -2.278785 |
| H  | 0.568503  | -0.196108 | -3.161563 |
| H  | 0.772209  | -1.819404 | -2.526967 |
| C  | -1.068023 | -0.877974 | -1.939724 |
| H  | -1.254018 | -1.616464 | -1.163775 |
| H  | -1.637674 | -1.151370 | -2.837669 |
| C  | -2.942085 | 0.245554  | -0.877511 |
| H  | -2.933672 | -0.682687 | -0.306103 |
| H  | -3.613795 | 0.117034  | -1.736113 |

|   |           |           |           |   |           |           |           |
|---|-----------|-----------|-----------|---|-----------|-----------|-----------|
| C | -3.458240 | 1.374266  | 0.013338  | H | -2.621135 | -1.269897 | -0.615931 |
| H | -3.395738 | 2.348676  | -0.481708 | H | -3.632771 | -0.289876 | -1.689743 |
| H | -4.529231 | 1.190672  | 0.158099  | C | -3.380644 | 0.528862  | 0.295171  |
| C | -2.833042 | 1.401524  | 1.406504  | H | -3.487244 | 1.595278  | 0.067723  |
| H | -2.837008 | 0.391261  | 1.816446  | H | -4.403427 | 0.167156  | 0.458151  |
| H | -3.431815 | 2.040308  | 2.068794  | C | -2.639198 | 0.318744  | 1.627220  |
| C | -1.422450 | 3.380508  | 1.302648  | H | -2.422750 | -0.743596 | 1.746436  |
| H | -2.015823 | 3.830856  | 2.107310  | H | -3.299615 | 0.616461  | 2.454987  |
| H | -0.409810 | 3.774440  | 1.343888  | C | -1.619868 | 2.482641  | 2.058896  |
| H | -1.858574 | 3.654542  | 0.343240  | H | -2.157272 | 2.581101  | 3.012872  |
| C | 2.503875  | 2.125056  | 1.365929  | H | -0.689562 | 3.046802  | 2.115792  |
| H | 3.133897  | 2.230276  | 2.257405  | H | -2.227591 | 2.917983  | 1.264741  |
| H | 2.109104  | 3.100542  | 1.089660  | C | 2.566687  | 1.997077  | 1.420570  |
| H | 3.119915  | 1.755771  | 0.552319  | H | 3.285646  | 1.990346  | 2.252368  |
| C | 2.359794  | 0.504070  | -1.823576 | H | 2.000899  | 2.928756  | 1.447282  |
| H | 3.060378  | 0.901635  | -1.096321 | H | 3.124180  | 1.965885  | 0.486655  |
| H | 1.956643  | 1.328577  | -2.407869 | C | 2.255262  | 1.182602  | -2.211779 |
| H | 2.903222  | -0.177054 | -2.489669 | H | 2.940987  | 1.536060  | -1.444857 |
| C | -1.602620 | 1.443699  | -2.515309 | H | 1.653215  | 2.027883  | -2.545107 |
| H | -0.612353 | 1.605415  | -2.934959 | H | 2.847032  | 0.807770  | -3.058915 |
| H | -1.973154 | 2.395773  | -2.138713 | C | -1.960736 | 1.503135  | -2.353219 |
| H | -2.272181 | 1.085853  | -3.306898 | H | -1.067936 | 1.946886  | -2.793024 |
| N | 0.523085  | 2.824089  | -0.893720 | H | -2.434811 | 2.257168  | -1.724326 |
| C | 0.796587  | 3.812951  | -1.431862 | H | -2.654743 | 1.224459  | -3.159124 |
| C | 1.135560  | 5.055488  | -2.108044 | N | 0.107223  | 2.780668  | -0.493575 |
| H | 2.220660  | 5.127399  | -2.225802 | C | 0.180803  | 3.913851  | -0.720677 |
| H | 0.778956  | 5.904313  | -1.517310 | C | 0.271980  | 5.338017  | -1.008532 |
| H | 0.662519  | 5.077719  | -3.094196 | H | 1.316794  | 5.614741  | -1.176674 |
| O | -0.761816 | -0.805187 | 0.876201  | H | -0.120538 | 5.911674  | -0.163928 |
| O | -0.910240 | -1.828280 | 3.534865  | H | -0.310941 | 5.571662  | -1.904174 |
| H | -0.743867 | -1.153488 | 1.790921  | O | -0.314247 | -1.227762 | 0.285665  |
| H | -1.347577 | -2.752930 | 3.411460  | O | -0.127471 | -2.438974 | 1.614492  |
| N | -2.104038 | -4.253164 | 3.243079  | H | 0.604712  | -3.813806 | 1.130068  |
| C | -1.721339 | -5.108463 | 2.273539  | H | -1.074588 | -2.663111 | 1.597634  |
| C | -2.311069 | -6.368886 | 2.146810  | N | 1.086930  | -4.739307 | 0.902605  |
| C | -3.306310 | -6.743096 | 3.048527  | C | 2.044993  | -5.178999 | 1.756114  |
| C | -3.690394 | -5.852334 | 4.048206  | C | 2.675752  | -6.385600 | 1.473629  |
| C | -3.067859 | -4.601730 | 4.117423  | C | 2.317085  | -7.096566 | 0.328053  |
| C | -0.619906 | -4.644067 | 1.355065  | C | 1.325223  | -6.605817 | -0.519676 |
| H | -0.821345 | -3.632621 | 0.986160  | C | 0.695727  | -5.403536 | -0.211580 |
| H | 0.337622  | -4.611409 | 1.890319  | C | 2.376626  | -4.317049 | 2.938633  |
| H | -0.505886 | -5.316055 | 0.500434  | H | 3.160070  | -3.596712 | 2.672262  |
| H | -1.989280 | -7.041335 | 1.358406  | H | 1.502989  | -3.752048 | 3.273286  |
| H | -3.776010 | -7.719650 | 2.972998  | H | 2.751387  | -4.929116 | 3.762013  |
| H | -4.461013 | -6.114483 | 4.765888  | H | 3.440339  | -6.756272 | 2.146303  |
| C | -3.457887 | -3.574251 | 5.149683  | H | 2.809561  | -8.036171 | 0.098735  |
| H | -2.580905 | -3.019198 | 5.495542  | H | 1.029657  | -7.147584 | -1.410590 |
| H | -4.158193 | -2.846088 | 4.720101  | C | -0.420281 | -4.811834 | -1.021253 |
| H | -3.947819 | -4.039958 | 6.008980  | H | -0.519587 | -3.739702 | -0.835561 |
|   |           |           |           | H | -0.251104 | -4.981568 | -2.087699 |
|   |           |           |           | H | -1.369549 | -5.293032 | -0.754948 |

=== Model-1, 5TSoo ===

|    |           |           |           |
|----|-----------|-----------|-----------|
| Fe | -0.040639 | 0.532794  | 0.045183  |
| N  | -1.345599 | 1.057272  | 1.767671  |
| N  | 1.641224  | 0.842792  | 1.525256  |
| N  | 1.372067  | 0.113180  | -1.681996 |
| N  | -1.608126 | 0.312720  | -1.545531 |
| C  | -0.513805 | 0.448880  | 2.851202  |
| H  | -0.951407 | 0.675010  | 3.835457  |
| H  | -0.521983 | -0.631068 | 2.705723  |
| C  | 0.932636  | 0.956218  | 2.846151  |
| H  | 1.493159  | 0.411355  | 3.617694  |
| H  | 0.954176  | 2.009410  | 3.134469  |
| C  | 2.410986  | -0.438567 | 1.426674  |
| H  | 3.208069  | -0.418998 | 2.186971  |
| H  | 1.724752  | -1.245834 | 1.677273  |
| C  | 3.077292  | -0.721315 | 0.063948  |
| H  | 3.671618  | -1.630747 | 0.221501  |
| H  | 3.815930  | 0.052681  | -0.167925 |
| C  | 2.209464  | -1.023443 | -1.175235 |
| H  | 1.529185  | -1.842846 | -0.949921 |
| H  | 2.883124  | -1.340582 | -1.986293 |
| C  | 0.477701  | -0.323512 | -2.810282 |
| H  | 0.437275  | 0.500168  | -3.526025 |
| H  | 0.932816  | -1.171088 | -3.339132 |
| C  | -0.948512 | -0.714076 | -2.405553 |
| H  | -0.935590 | -1.643080 | -1.839404 |
| H  | -1.530804 | -0.873028 | -3.326151 |
| C  | -2.846601 | -0.247366 | -0.921487 |

=== Model-1, 3TSoo ===

|    |           |           |           |
|----|-----------|-----------|-----------|
| Fe | -0.043178 | 0.045044  | 0.134385  |
| N  | -1.301097 | 0.774504  | 1.670445  |
| N  | 1.518805  | 0.509993  | 1.477474  |
| N  | 1.293878  | -0.321050 | -1.517505 |
| N  | -1.523566 | -0.081569 | -1.307227 |
| C  | -0.561495 | 0.280596  | 2.871142  |
| H  | -1.039222 | 0.648103  | 3.790762  |
| H  | -0.608829 | -0.808006 | 2.854213  |
| C  | 0.887292  | 0.729676  | 2.832338  |
| H  | 1.461621  | 0.197746  | 3.598402  |
| H  | 0.961290  | 1.792880  | 3.066813  |
| C  | 2.395654  | -0.710705 | 1.505980  |
| H  | 3.185308  | -0.542690 | 2.252702  |
| H  | 1.767775  | -1.534046 | 1.843881  |
| C  | 3.073725  | -1.070063 | 0.174002  |
| H  | 3.666108  | -1.970544 | 0.379985  |
| H  | 3.813105  | -0.310250 | -0.098441 |
| C  | 2.193938  | -1.423592 | -1.035036 |
| H  | 1.547899  | -2.264246 | -0.785868 |
| H  | 2.851138  | -1.715659 | -1.866589 |
| C  | 0.431585  | -0.805500 | -2.658071 |
| H  | 0.417147  | -0.023929 | -3.419262 |
| H  | 0.889026  | -1.686015 | -3.122565 |
| C  | -0.988756 | -1.131685 | -2.227562 |
| H  | -1.018340 | -2.071798 | -1.679697 |

|   |           |           |           |   |           |           |           |
|---|-----------|-----------|-----------|---|-----------|-----------|-----------|
| H | -1.630931 | -1.218663 | -3.115124 | C | -1.059435 | -1.445484 | -1.214554 |
| C | -2.845222 | -0.558132 | -0.789617 | H | -0.976330 | -2.052697 | -0.314564 |
| H | -2.694137 | -1.584824 | -0.451791 | H | -1.702951 | -1.974265 | -1.930541 |
| H | -3.551840 | -0.573608 | -1.630628 | C | -2.876160 | -0.403120 | 0.070500  |
| C | -3.429853 | 0.259879  | 0.360176  | H | -2.601368 | -1.210092 | 0.751213  |
| H | -3.589995 | 1.305320  | 0.078293  | H | -3.699306 | -0.763300 | -0.560885 |
| H | -4.431647 | -0.143815 | 0.549938  | C | -3.357812 | 0.804964  | 0.887877  |
| C | -2.654256 | 0.137827  | 1.670150  | H | -3.504173 | 1.684479  | 0.251907  |
| H | -2.506766 | -0.920465 | 1.892717  | H | -4.358925 | 0.543562  | 1.250600  |
| H | -3.238807 | 0.576483  | 2.490835  | C | -2.531753 | 1.148272  | 2.136174  |
| C | -1.451184 | 2.253543  | 1.708018  | H | -2.283566 | 0.226209  | 2.663735  |
| H | -1.963252 | 2.560852  | 2.629767  | H | -3.138649 | 1.766845  | 2.810750  |
| H | -0.479656 | 2.743076  | 1.660150  | C | -1.536605 | 3.307537  | 1.601105  |
| H | -2.035497 | 2.591467  | 0.852348  | H | -2.026854 | 3.765550  | 2.469781  |
| C | 2.342788  | 1.725500  | 1.208894  | H | -0.618642 | 3.852905  | 1.385182  |
| H | 2.988212  | 1.934496  | 2.071167  | H | -2.195221 | 3.394386  | 0.736827  |
| H | 1.694014  | 2.582609  | 1.022703  | C | 2.573866  | 2.592349  | 0.914037  |
| H | 2.980308  | 1.587243  | 0.343251  | H | 3.339009  | 2.924151  | 1.627710  |
| C | 2.116573  | 0.793091  | -2.074911 | H | 1.977200  | 3.451033  | 0.608364  |
| H | 2.906169  | 1.081876  | -1.390415 | H | 3.074453  | 2.190957  | 0.036044  |
| H | 1.488195  | 1.664898  | -2.264433 | C | 2.082805  | 0.385486  | -2.042613 |
| H | 2.587498  | 0.472334  | -3.012470 | H | 2.783046  | 1.042949  | -1.533667 |
| C | -1.710313 | 1.202542  | -2.042628 | H | 1.438161  | 0.994085  | -2.675943 |
| H | -0.754249 | 1.593444  | -2.387242 | H | 2.651182  | -0.308119 | -2.675133 |
| H | -2.156312 | 1.948058  | -1.385882 | C | -2.142424 | 0.596043  | -2.027152 |
| H | -2.369425 | 1.047786  | -2.906554 | H | -1.296365 | 0.830266  | -2.671665 |
| N | 0.447654  | 0.478376  | -0.964496 | H | -2.618791 | 1.531636  | -1.734659 |
| C | 0.351132  | 5.220890  | -1.147052 | H | -2.863141 | -0.009344 | -2.591471 |
| C | 0.229903  | 6.657566  | -1.376209 | N | 0.016983  | 2.483217  | -0.906681 |
| H | 0.841769  | 6.953030  | -2.233498 | C | 0.021777  | 3.400529  | -1.612303 |
| H | 0.567962  | 7.207296  | -0.492922 | C | 0.027400  | 4.548491  | -2.502221 |
| H | -0.813203 | 6.917898  | -1.578249 | H | 0.933541  | 5.138046  | -2.334774 |
| O | -0.316260 | -1.682058 | 0.511631  | H | -0.851712 | 5.168992  | -2.304985 |
| O | -0.063516 | -2.782643 | 1.912503  | H | 0.004090  | 4.204975  | -3.540696 |
| H | 0.588316  | -4.142646 | 1.386152  | O | -0.210251 | -0.679402 | 1.437799  |
| H | -1.012020 | -2.980356 | 2.002373  | O | -0.015653 | -1.843187 | 3.417343  |
| N | 1.056030  | -5.063932 | 1.085842  | H | 0.111214  | -1.320657 | 2.266175  |
| C | 2.117211  | -5.501112 | 1.806332  | H | -0.653647 | -2.638210 | 3.313608  |
| C | 2.731050  | -6.690207 | 1.425255  | N | -1.583082 | -4.063053 | 3.278188  |
| C | 2.247589  | -7.387790 | 0.318627  | C | -1.053860 | -5.183832 | 2.748906  |
| C | 1.150562  | -6.901219 | -0.391854 | C | -1.726511 | -6.407193 | 2.822367  |
| C | 0.543836  | -5.716931 | 0.014512  | C | -2.967021 | -6.458762 | 3.455233  |
| C | 2.574874  | -4.658037 | 2.960758  | C | -3.504189 | -5.293382 | 3.998408  |
| H | 3.392327  | -3.997807 | 2.645557  | C | -2.781962 | -4.100886 | 3.892747  |
| H | 1.762164  | -4.033344 | 3.338659  | C | 0.285313  | -5.049334 | 2.069168  |
| H | 2.952808  | -5.290840 | 3.767656  | H | 0.177776  | -4.535720 | 1.105164  |
| H | 3.578918  | -7.056221 | 1.992558  | H | 0.972660  | -4.455272 | 2.679826  |
| H | 2.724464  | -8.313143 | 0.011488  | H | 0.735589  | -6.027339 | 1.880514  |
| H | 0.758192  | -7.432276 | -1.251322 | H | -1.279174 | -7.298356 | 2.394452  |
| C | -0.670732 | -5.128941 | -0.641500 | H | -3.506761 | -7.398512 | 3.529318  |
| H | -0.723479 | -4.049886 | -0.475038 | H | -4.465296 | -5.302534 | 4.502018  |
| H | -0.662865 | -5.333838 | -1.714941 | C | -3.306027 | -2.799450 | 4.444711  |
| H | -1.577915 | -5.582753 | -0.222913 | H | -2.520306 | -2.263913 | 4.987001  |
|   |           |           |           | H | -3.645695 | -2.145433 | 3.631363  |
|   |           |           |           | H | -4.150956 | -2.964506 | 5.118250  |

=== Model-1, 5TShat ===

|    |           |           |           |
|----|-----------|-----------|-----------|
| Fe | -0.059969 | 0.728931  | 0.389086  |
| N  | -1.245629 | 1.878433  | 1.880477  |
| N  | 1.699549  | 1.566621  | 1.546258  |
| N  | 1.259924  | -0.378339 | -1.065007 |
| N  | -1.695856 | -0.147679 | -0.820905 |
| C  | -0.346032 | 1.752083  | 3.071732  |
| H  | -0.730926 | 2.369038  | 3.895269  |
| H  | -0.366091 | 0.711848  | 3.392961  |
| C  | 1.085200  | 2.198194  | 2.769569  |
| H  | 1.711813  | 1.988609  | 3.644375  |
| H  | 1.108090  | 3.278883  | 2.620739  |
| C  | 2.527589  | 0.367627  | 1.916567  |
| H  | 3.374816  | 0.722700  | 2.520114  |
| H  | 1.919206  | -0.270280 | 2.556331  |
| C  | 3.101080  | -0.445588 | 0.741474  |
| H  | 3.730622  | -1.213474 | 1.207850  |
| H  | 3.798010  | 0.166496  | 0.161459  |
| C  | 2.159114  | -1.217449 | -0.199057 |
| H  | 1.520782  | -1.889024 | 0.374176  |
| H  | 2.781283  | -1.832151 | -0.864463 |
| C  | 0.313863  | -1.245734 | -1.857056 |
| H  | 0.196522  | -0.782664 | -2.838271 |
| H  | 0.770709  | -2.227912 | -2.026294 |

=== Model-1, 3TShat ===

|    |           |           |           |
|----|-----------|-----------|-----------|
| Fe | -0.121676 | 0.814778  | 0.278037  |
| N  | -1.299372 | 1.926646  | 1.676294  |
| N  | 1.524562  | 1.271224  | 1.656553  |
| N  | 1.128189  | -0.292021 | -1.091643 |
| N  | -1.687203 | 0.338644  | -1.121660 |
| C  | -0.610123 | 1.596167  | 2.968575  |
| H  | -1.044574 | 2.200093  | 3.776068  |
| H  | -0.803102 | 0.547266  | 3.185438  |
| C  | 0.878957  | 1.872500  | 2.884641  |
| H  | 1.374573  | 1.487722  | 3.782286  |
| H  | 1.063805  | 2.947118  | 2.861250  |
| C  | 2.171117  | -0.042118 | 2.004324  |
| H  | 2.984229  | 0.174250  | 2.710077  |
| H  | 1.438041  | -0.649228 | 2.533005  |
| C  | 2.764870  | -0.822807 | 0.825352  |
| H  | 3.220699  | -1.717297 | 1.266924  |
| H  | 3.600882  | -0.274767 | 0.380787  |
| C  | 1.820621  | -1.343801 | -0.265048 |
| H  | 1.043213  | -1.969365 | 0.170231  |
| H  | 2.410506  | -1.958754 | -0.957194 |
| C  | 0.201395  | -0.951450 | -2.089931 |

|   |           |           |           |   |           |           |           |
|---|-----------|-----------|-----------|---|-----------|-----------|-----------|
| H | 0.272891  | -0.391548 | -3.023048 | H | 2.436448  | -0.657957 | -2.330427 |
| H | 0.557849  | -1.965059 | -2.300931 | C | 0.047689  | 0.429401  | -3.072802 |
| C | -1.236200 | -1.003881 | -1.614005 | H | -0.003330 | 1.272199  | -3.764725 |
| H | -1.343635 | -1.700073 | -0.785254 | H | 0.479649  | -0.408970 | -3.633350 |
| H | -1.883310 | -1.330125 | -2.438723 | C | -1.365270 | 0.045457  | -2.628051 |
| C | -3.018770 | 0.172648  | -0.455120 | H | -1.344456 | -0.888498 | -2.068922 |
| H | -2.964416 | -0.732535 | 0.149857  | H | -1.983353 | -0.099193 | -3.525724 |
| H | -3.761971 | 0.009304  | -1.246025 | C | -3.212566 | 0.519006  | -1.089028 |
| C | -3.455646 | 1.338385  | 0.429291  | H | -2.988258 | -0.510778 | -0.806269 |
| H | -3.439920 | 2.291454  | -0.109105 | H | -4.013250 | 0.494079  | -1.841459 |
| H | -4.508797 | 1.162184  | 0.676630  | C | -3.709524 | 1.279107  | 0.151034  |
| C | -2.707658 | 1.418721  | 1.758758  | H | -3.806337 | 2.351268  | -0.052193 |
| H | -2.664454 | 0.424037  | 2.202665  | H | -4.733278 | 0.927806  | 0.328509  |
| H | -3.250091 | 2.078000  | 2.448450  | C | -2.939531 | 1.024992  | 1.456918  |
| C | -1.327609 | 3.402551  | 1.473244  | H | -2.730231 | -0.041903 | 1.544732  |
| H | -1.864290 | 3.872482  | 2.305784  | H | -3.572715 | 1.312160  | 2.308629  |
| H | -0.318374 | 3.805445  | 1.429092  | C | -1.878589 | 3.163325  | 1.927513  |
| H | -1.834508 | 3.643326  | 0.539984  | H | -2.392926 | 3.236420  | 2.895751  |
| C | 2.584450  | 2.230219  | 1.227416  | H | -0.939484 | 3.712713  | 1.983304  |
| H | 3.290900  | 2.379669  | 2.052818  | H | -2.497964 | 3.633283  | 1.162617  |
| H | 2.137653  | 3.186981  | 0.965386  | C | 2.297570  | 2.593237  | 1.156190  |
| H | 3.134030  | 1.854502  | 0.369788  | H | 3.033003  | 2.536654  | 1.970686  |
| C | 2.145496  | 0.452426  | -1.891126 | H | 1.766946  | 3.543259  | 1.223252  |
| H | 2.870983  | 0.944383  | -1.250976 | H | 2.832840  | 2.568688  | 0.209472  |
| H | 1.655394  | 1.203823  | -2.506552 | C | 1.872775  | 1.884347  | -2.480676 |
| H | 2.675039  | -0.253232 | -2.542097 | H | 2.584474  | 2.200812  | -1.721743 |
| C | -1.832410 | 1.285025  | -2.264041 | H | 1.285766  | 2.751658  | -2.782722 |
| H | -0.878623 | 1.441224  | -2.762725 | H | 2.433871  | 1.511803  | -3.348617 |
| H | -2.196585 | 2.247776  | -1.908074 | C | -2.342852 | 2.284677  | -2.522341 |
| H | -2.549679 | 0.875568  | -2.985334 | H | -1.456318 | 2.726835  | -2.976025 |
| N | 0.382826  | 2.726223  | -0.849945 | H | -2.796927 | 3.031167  | -1.870438 |
| C | 0.601221  | 3.701886  | -1.434238 | H | -3.056404 | 2.022235  | -3.315149 |
| C | 0.876500  | 4.927959  | -2.164676 | N | -0.197955 | 3.457835  | -0.641375 |
| H | 1.950784  | 5.009031  | -2.354330 | C | -0.109030 | 4.591338  | -0.858293 |
| H | 0.546476  | 5.787888  | -1.574435 | C | 0.002384  | 6.015274  | -1.133111 |
| H | 0.339912  | 4.915532  | -3.117933 | H | 1.051663  | 6.277952  | -1.295998 |
| O | -0.636444 | -0.685949 | 1.149813  | H | -0.385380 | 6.585656  | -0.284096 |
| O | -0.591376 | -1.879077 | 3.184502  | H | -0.575382 | 6.262763  | -2.028428 |
| H | -0.345630 | -1.244674 | 1.978629  | O | -0.610858 | -0.400137 | 0.130906  |
| H | -1.156947 | -2.690132 | 2.975411  | O | -0.673958 | -2.057422 | 1.531876  |
| N | -2.069874 | -4.202259 | 2.788112  | H | 0.115046  | -3.213745 | 1.077853  |
| C | -1.463958 | -5.292340 | 2.279757  | H | -1.569424 | -2.151764 | 1.164448  |
| C | -2.090706 | -6.543007 | 2.286031  | N | 0.735776  | -4.106650 | 0.833494  |
| C | -3.368935 | -6.653990 | 2.828971  | C | 1.617168  | -4.538781 | 1.766334  |
| C | -3.987515 | -5.519771 | 3.352375  | C | 2.399976  | -5.654255 | 1.482299  |
| C | -3.306316 | -4.299276 | 3.315630  | C | 2.264918  | -6.289035 | 0.247902  |
| C | -0.089416 | -5.096245 | 1.690347  | C | 1.344987  | -5.812575 | -0.684947 |
| H | -0.162663 | -4.793667 | 0.637284  | C | 0.565089  | -4.703169 | -0.368786 |
| H | 0.446977  | -4.306222 | 2.223248  | C | 1.707808  | -3.764038 | 3.049811  |
| H | 0.497251  | -6.018503 | 1.728472  | H | 2.455038  | -2.965885 | 2.957530  |
| H | -1.579192 | -7.408707 | 1.877352  | H | 0.750345  | -3.297034 | 3.292970  |
| H | -3.874925 | -7.615063 | 2.851043  | H | 2.016457  | -4.417067 | 3.869620  |
| H | -4.979707 | -5.574909 | 3.788666  | H | 3.105316  | -6.013111 | 2.223036  |
| C | -3.920623 | -3.028390 | 3.847051  | H | 2.873976  | -7.156746 | 0.014631  |
| H | -3.164078 | -2.412913 | 4.342624  | H | 1.221489  | -6.294957 | -1.647781 |
| H | -4.340662 | -2.432441 | 3.026138  | C | -0.491141 | -4.144137 | -1.278604 |
| H | -4.728979 | -3.240112 | 4.552352  | H | -0.692955 | -3.095146 | -1.048729 |

=== Model-1, 5Int-oh ===

|    |           |           |           |
|----|-----------|-----------|-----------|
| Fe | -0.395084 | 1.254737  | -0.206422 |
| N  | -1.632421 | 1.743533  | 1.583802  |
| N  | 1.333470  | 1.468731  | 1.252236  |
| N  | 0.973443  | 0.824661  | -1.955084 |
| N  | -1.983892 | 1.076624  | -1.739492 |
| C  | -0.786847 | 1.083058  | 2.628481  |
| H  | -1.194915 | 1.296572  | 3.627599  |
| H  | -0.828139 | 0.007309  | 2.452524  |
| C  | 0.664212  | 1.568139  | 2.594988  |
| H  | 1.239784  | 0.999837  | 3.337381  |
| H  | 0.710903  | 2.615288  | 2.902051  |
| C  | 2.055585  | 0.161026  | 1.109305  |
| H  | 2.862016  | 0.136773  | 1.858571  |
| H  | 1.339465  | -0.626250 | 1.342782  |
| C  | 2.691630  | -0.105830 | -0.268675 |
| H  | 3.259124  | -1.037367 | -0.146775 |
| H  | 3.449948  | 0.650272  | -0.495541 |
| C  | 1.791002  | -0.347910 | -1.494939 |
| H  | 1.094626  | -1.157264 | -1.280427 |

=== Model-1, 5P ===

|    |           |           |           |
|----|-----------|-----------|-----------|
| Fe | 0.207092  | 0.681059  | -0.299977 |
| N  | -0.373046 | 0.506302  | 1.813529  |
| N  | 2.200816  | 1.277167  | 0.545080  |
| N  | 0.975833  | 0.788368  | -2.418595 |
| N  | -1.652520 | -0.006150 | -1.260557 |
| C  | 0.937157  | 0.142900  | 2.443119  |
| H  | 0.838241  | 0.180556  | 3.536109  |
| H  | 1.178626  | -0.883447 | 2.163138  |
| C  | 2.054763  | 1.096078  | 2.031251  |
| H  | 3.000903  | 0.731624  | 2.448171  |
| H  | 1.881816  | 2.083663  | 2.461765  |
| C  | 3.186150  | 0.289309  | -0.018218 |
| H  | 4.164811  | 0.512758  | 0.428483  |
| H  | 2.886274  | -0.702596 | 0.319782  |
| C  | 3.352699  | 0.304794  | -1.547415 |
| H  | 4.146374  | -0.423191 | -1.755872 |
| H  | 3.764434  | 1.263309  | -1.877719 |



|   |           |           |           |   |           |           |           |
|---|-----------|-----------|-----------|---|-----------|-----------|-----------|
| C | 2.178097  | -0.113937 | -2.447323 | H | 3.813671  | -1.065426 | -1.520150 |
| H | 1.841035  | -1.115209 | -2.178817 | H | 3.629784  | 0.618761  | -1.895532 |
| H | 2.540519  | -0.147818 | -3.483921 | C | 1.864212  | -0.614895 | -2.189826 |
| C | -0.140870 | 0.217994  | -3.249049 | H | 1.437938  | -1.528919 | -1.778020 |
| H | -0.685532 | 1.058810  | -3.681386 | H | 2.152260  | -0.810966 | -3.230585 |
| H | 0.280321  | -0.350494 | -4.086548 | C | -0.429090 | -0.137066 | -2.954619 |
| C | -1.103688 | -0.679772 | -2.479068 | H | -0.892088 | 0.686294  | -3.499887 |
| H | -0.604092 | -1.591611 | -2.153322 | H | -0.093953 | -0.864047 | -3.702342 |
| H | -1.926941 | -0.963350 | -3.147394 | C | -1.430302 | -0.781779 | -2.023754 |
| C | -2.321433 | -1.026698 | -0.384861 | H | -1.023722 | -1.692617 | -1.586196 |
| H | -1.695882 | -1.921031 | -0.389614 | H | -2.339509 | -1.041762 | -2.579387 |
| H | -3.277277 | -1.288289 | -0.856520 | C | -2.576871 | -0.658677 | 0.096968  |
| C | -2.566126 | -0.593776 | 1.064286  | H | -2.073725 | -1.619672 | 0.213893  |
| H | -3.075697 | 0.373968  | 1.115679  | H | -3.558041 | -0.847307 | -0.354993 |
| H | -3.278174 | -1.315799 | 1.480384  | C | -2.744616 | -0.019970 | 1.469530  |
| C | -1.336496 | -0.633578 | 1.978473  | H | -3.178554 | 0.983125  | 1.410180  |
| H | -0.780734 | -1.555749 | 1.799239  | H | -3.482822 | -0.625381 | 2.007852  |
| H | -1.660938 | -0.640687 | 3.027119  | C | -1.466574 | -0.048506 | 2.298625  |
| C | -0.937231 | 1.728054  | 2.446626  | H | -1.031411 | -1.048689 | 2.259756  |
| H | -1.105703 | 1.543783  | 3.514692  | H | -1.693641 | 0.176421  | 3.347815  |
| H | -0.254577 | 2.569455  | 2.338330  | C | -0.805512 | 2.290668  | 2.274866  |
| H | -1.885397 | 1.990200  | 1.977698  | H | -0.974443 | 2.306147  | 3.357358  |
| C | 2.697886  | 2.663852  | 0.324688  | H | -0.029835 | 3.011811  | 2.029165  |
| H | 3.652209  | 2.802254  | 0.848531  | H | -1.724583 | 2.581931  | 1.769095  |
| H | 1.976612  | 3.383658  | 0.709988  | C | 2.761176  | 2.449243  | 0.043801  |
| H | 2.854718  | 2.861354  | -0.731930 | H | 3.734064  | 2.553001  | 0.538046  |
| C | 1.326393  | 2.106603  | -3.016776 | H | 2.136570  | 3.298631  | 0.312745  |
| H | 2.171394  | 2.557339  | -2.503975 | H | 2.921902  | 2.455549  | -1.028560 |
| H | 0.476361  | 2.784714  | -2.951960 | C | 1.223404  | 1.590653  | -3.020747 |
| H | 1.594901  | 1.972780  | -4.072246 | H | 2.136164  | 2.017048  | -2.618804 |
| C | -2.639225 | 1.041057  | -1.637518 | H | 0.450544  | 2.356488  | -3.032412 |
| H | -2.180433 | 1.795540  | -2.274172 | H | 1.418958  | 1.266417  | -4.049364 |
| H | -3.022271 | 1.530963  | -0.742630 | C | -2.632968 | 1.257584  | -1.397177 |
| H | -3.475176 | 0.581191  | -2.178702 | H | -2.107087 | 1.838450  | -2.151302 |
| N | -0.372568 | 2.643406  | -0.390000 | H | -2.907483 | 1.919118  | -0.576910 |
| C | -0.704904 | 3.749563  | -0.444859 | H | -3.545236 | 0.842863  | -1.840559 |
| C | -1.121210 | 5.137654  | -0.510007 | N | -0.215094 | 2.703848  | -0.565098 |
| H | -0.429786 | 5.696017  | -1.148015 | C | -0.412857 | 3.822841  | -0.779753 |
| H | -1.116280 | 5.566522  | 0.496608  | C | -0.663514 | 5.227150  | -1.047426 |
| H | -2.131105 | 5.196056  | -0.926815 | H | 0.138679  | 5.629390  | -1.673196 |
| O | 0.621948  | -0.876776 | -0.232983 | H | -0.699554 | 5.777811  | -0.102678 |
| O | 1.881904  | -2.944641 | 1.355370  | H | -1.620182 | 5.333978  | -1.567572 |
| H | 1.458463  | -3.819293 | 1.552126  | O | 0.373969  | -0.871178 | 0.124397  |
| H | 1.341231  | -2.560380 | 0.646345  | O | 1.233570  | -2.818554 | 2.030736  |
| N | 0.789317  | -5.543053 | 1.811934  | H | 1.125631  | -3.793878 | 1.893977  |
| C | 0.101016  | -5.883377 | 2.920282  | H | 0.869243  | -2.412261 | 1.226219  |
| C | -0.258492 | -7.208498 | 3.179079  | N | 0.948954  | -5.630999 | 1.610990  |
| C | 0.107841  | -8.197911 | 2.266083  | C | -0.153229 | -6.278217 | 2.037730  |
| C | 0.819370  | -7.838594 | 1.125340  | C | -0.249560 | -7.672112 | 1.980828  |
| C | 1.144810  | -6.490571 | 0.925532  | C | 0.820818  | -8.401335 | 1.464835  |
| C | -0.263162 | -4.761162 | 3.859849  | C | 1.954560  | -7.724095 | 1.022411  |
| H | -0.692997 | -5.142258 | 4.790065  | C | 1.986400  | -6.327282 | 1.109831  |
| H | 0.618876  | -4.158434 | 4.101637  | C | -1.284309 | -5.425897 | 2.558699  |
| H | -0.996489 | -4.090743 | 3.394757  | H | -1.821979 | -5.925327 | 3.370607  |
| H | -0.809579 | -7.456578 | 4.080543  | H | -0.903502 | -4.465061 | 2.914646  |
| H | -0.154914 | -9.236518 | 2.446763  | H | -2.011512 | -5.221260 | 1.761633  |
| H | 1.124373  | -8.584153 | 0.397524  | H | -1.145389 | -8.170730 | 2.337914  |
| C | 1.893629  | -6.035225 | -0.303269 | H | 0.772908  | -9.485530 | 1.413393  |
| H | 2.375332  | -5.071970 | -0.118440 | H | 2.806557  | -8.263200 | 0.619428  |
| H | 2.649074  | -6.767828 | -0.604406 | C | 3.180409  | -5.534398 | 0.635944  |
| H | 1.205305  | -5.910447 | -1.149800 | H | 3.110711  | -4.501485 | 0.985340  |

=== Model-1, 3P ===

|    |           |           |           |
|----|-----------|-----------|-----------|
| Fe | 0.130649  | 0.696681  | -0.173995 |
| N  | -0.400738 | 0.914943  | 1.860377  |
| N  | 2.119803  | 1.177142  | 0.494856  |
| N  | 0.765972  | 0.416287  | -2.218389 |
| N  | -1.779312 | 0.140948  | -0.893239 |
| C  | 0.864473  | 0.523562  | 2.568820  |
| H  | 0.767670  | 0.754657  | 3.637068  |
| H  | 0.988359  | -0.553610 | 2.466510  |
| C  | 2.049478  | 1.269159  | 1.998825  |
| H  | 2.977409  | 0.880546  | 2.431925  |
| H  | 1.997942  | 2.326374  | 2.262226  |
| C  | 3.001521  | 0.020706  | 0.097984  |
| H  | 4.004406  | 0.229883  | 0.492142  |
| H  | 2.621169  | -0.868831 | 0.599577  |
| C  | 3.122857  | -0.220779 | -1.410241 |

=== Model-2, 5RC ===

|    |           |           |           |
|----|-----------|-----------|-----------|
| Fe | 0.091258  | 1.033656  | 0.048759  |
| N  | -1.337195 | 1.157082  | 1.763896  |
| N  | 1.653975  | 1.305384  | 1.664207  |
| N  | 1.617235  | 0.195127  | -1.362372 |
| N  | -1.377310 | 0.048270  | -1.350278 |
| C  | -0.467868 | 0.819870  | 2.930660  |
| H  | -0.989693 | 1.051193  | 3.870437  |
| H  | -0.295950 | -0.258805 | 2.905202  |
| C  | 0.856568  | 1.568379  | 2.903107  |
| H  | 1.443859  | 1.292638  | 3.789895  |
| H  | 0.685422  | 2.645530  | 2.961785  |
| C  | 2.397280  | 0.012361  | 1.814323  |



|   |           |           |           |
|---|-----------|-----------|-----------|
| H | -3.353147 | 0.798855  | 0.033043  |
| H | -3.982012 | -0.664316 | 0.737544  |
| C | -2.394435 | 0.149057  | 1.886454  |
| H | -1.983047 | -0.784289 | 2.273509  |
| H | -3.168589 | 0.481547  | 2.593956  |
| C | -1.880619 | 2.518372  | 1.780476  |
| H | -2.527915 | 2.717831  | 2.646686  |
| H | -1.094945 | 3.272530  | 1.744457  |
| H | -2.472420 | 2.608550  | 0.869092  |
| C | 2.404582  | 2.796015  | 1.479036  |
| H | 3.023302  | 3.136416  | 2.322093  |
| H | 1.677834  | 3.571295  | 1.234641  |
| H | 3.051689  | 2.654970  | 0.615881  |
| C | 2.597316  | 1.120191  | -1.842874 |
| H | 3.146090  | 1.767156  | -1.161504 |
| H | 1.884702  | 1.733618  | -2.395073 |
| H | 3.313247  | 0.677313  | -2.550135 |
| C | -1.619222 | 0.480683  | -2.225827 |
| H | -0.801929 | 1.006895  | -2.718561 |
| H | -2.306179 | 1.229537  | -1.829595 |
| H | -2.150979 | -0.129879 | -2.970585 |
| N | 0.014980  | 2.647135  | -0.688656 |
| C | -0.116055 | 3.668822  | -1.218421 |
| C | -0.279309 | 4.952402  | -1.886429 |
| H | 0.694489  | 5.439233  | -1.993082 |
| H | -0.939119 | 5.595374  | -1.296713 |
| H | -0.716286 | 4.801337  | -2.877770 |
| O | 0.278470  | -1.400973 | 1.134609  |
| O | 0.554384  | -1.869305 | 2.527634  |
| H | 0.880382  | -3.047830 | 1.373750  |
| H | -0.339191 | -2.111645 | 2.835600  |
| N | 1.152091  | -4.013855 | 1.027871  |
| C | 1.427242  | -5.067854 | 0.667791  |
| C | 1.771873  | -6.395715 | 0.212052  |
| H | 0.859707  | -6.996297 | 0.142181  |
| H | 2.462279  | -6.853965 | 0.926617  |
| H | 2.246134  | -6.327977 | -0.771654 |

=== Model-2, 3TS1 ===

|    |           |           |           |
|----|-----------|-----------|-----------|
| Fe | 0.258622  | 0.563038  | 0.384423  |
| N  | -1.232241 | 1.090482  | 1.809102  |
| N  | 1.617550  | 1.454071  | 1.767281  |
| N  | 1.799638  | 0.044580  | -1.042430 |
| N  | -1.052676 | -0.341298 | -1.018866 |
| C  | -0.467944 | 0.997712  | 3.089481  |
| H  | -1.073746 | 1.378696  | 3.924815  |
| H  | -0.255586 | -0.053673 | 3.272529  |
| C  | 0.828796  | 1.779772  | 3.007263  |
| H  | 1.436417  | 1.586379  | 3.899725  |
| H  | 0.622068  | 2.851321  | 2.996632  |
| C  | 2.634600  | 0.391142  | 2.075286  |
| H  | 3.310925  | 0.784442  | 2.848744  |
| H  | 2.096109  | -0.455829 | 2.498330  |
| C  | 3.491579  | -0.069033 | 0.886574  |
| H  | 4.198083  | -0.800566 | 1.299260  |
| H  | 4.120116  | 0.749765  | 0.522733  |
| C  | 2.795451  | -0.782331 | -0.281093 |
| H  | 2.256187  | -1.648092 | 0.098197  |
| H  | 3.565760  | -1.126985 | -0.986345 |
| C  | 1.136426  | -0.797371 | -2.098475 |
| H  | 0.971039  | -0.162901 | -2.971104 |
| H  | 1.812112  | -1.599968 | -2.419285 |
| C  | -0.179456 | -1.389018 | -1.628612 |
| H  | -0.007489 | -2.142398 | -0.860776 |
| H  | -0.690664 | -1.866299 | -2.477788 |
| C  | -2.235080 | -1.026671 | -0.405307 |
| H  | -1.850556 | -1.882598 | 0.150323  |
| H  | -2.872419 | -1.400658 | -1.219120 |
| C  | -3.062613 | -0.159261 | 0.541691  |
| H  | -3.409012 | 0.759494  | 0.057012  |
| H  | -3.972853 | -0.725971 | 0.772911  |
| C  | -2.377498 | 0.130160  | 1.876778  |
| H  | -1.991725 | -0.808390 | 2.276567  |
| H  | -3.110932 | 0.521004  | 2.596073  |
| C  | -1.780046 | 2.464953  | 1.650486  |
| H  | -2.424985 | 2.713214  | 2.504368  |
| H  | -0.974729 | 3.193170  | 1.584406  |
| H  | -2.364206 | 2.532007  | 0.733137  |

|   |           |           |           |
|---|-----------|-----------|-----------|
| C | 2.319283  | 2.713501  | 1.392050  |
| H | 2.918176  | 3.072183  | 2.239622  |
| H | 1.587329  | 3.472123  | 1.118501  |
| H | 2.982748  | 2.559594  | 0.547155  |
| C | 2.522002  | 1.122969  | -1.774771 |
| H | 3.118125  | 1.727876  | -1.098228 |
| H | 1.805888  | 1.773021  | -2.276258 |
| H | 3.195510  | 0.679748  | -2.520327 |
| C | -1.541414 | 0.584130  | -2.076516 |
| H | -0.710060 | 1.103837  | -2.547494 |
| H | -2.197714 | 1.337260  | -1.641458 |
| H | -2.096982 | 0.021819  | -2.839156 |
| N | 0.026474  | 2.950379  | -0.839624 |
| C | -0.104533 | 3.979603  | -1.358362 |
| C | -0.268674 | 5.273397  | -2.010749 |
| H | 0.705870  | 5.755381  | -2.131234 |
| H | -0.912785 | 5.916822  | -1.404399 |
| H | -0.724666 | 5.138222  | -2.995794 |
| O | 0.272848  | -1.532339 | 1.198513  |
| O | 0.518550  | -1.995129 | 2.602239  |
| H | 0.886058  | -3.158059 | 1.490843  |
| H | -0.381866 | -2.225444 | 2.898078  |
| N | 1.190016  | -4.112752 | 1.124793  |
| C | 1.504646  | -5.145688 | 0.736496  |
| C | 1.901000  | -6.446240 | 0.243622  |
| H | 1.051357  | -7.131688 | 0.319343  |
| H | 2.733072  | -6.821795 | 0.846713  |
| H | 2.211119  | -6.356784 | -0.801858 |

=== Model-2, 5TShooh ===

|    |           |           |           |
|----|-----------|-----------|-----------|
| Fe | 0.072928  | 0.603114  | 0.271574  |
| N  | -1.186173 | 1.287539  | 1.945084  |
| N  | 1.769455  | 1.269738  | 1.561819  |
| N  | 1.413368  | -0.048722 | -1.408075 |
| N  | -1.556409 | -0.051812 | -1.123181 |
| C  | -0.266153 | 0.990048  | 3.090952  |
| H  | -0.685831 | 1.397560  | 4.021242  |
| H  | -0.197508 | -0.092227 | 3.190870  |
| C  | 1.130977  | 1.582380  | 2.893622  |
| H  | 1.778708  | 1.227754  | 3.704424  |
| H  | 1.089372  | 2.669346  | 2.980475  |
| C  | 2.668106  | 0.066147  | 1.652560  |
| H  | 3.490459  | 0.311115  | 2.340218  |
| H  | 2.092749  | -0.741628 | 2.102388  |
| C  | 3.298689  | -0.400589 | 0.324547  |
| H  | 3.978874  | -1.215153 | 0.602667  |
| H  | 3.951372  | 0.377873  | -0.081532 |
| C  | 2.414748  | -0.988786 | -0.794169 |
| H  | 1.879036  | -1.862808 | -0.428049 |
| H  | 3.080690  | -1.339562 | -1.595128 |
| C  | 0.512620  | -0.754667 | -2.394812 |
| H  | 0.389403  | -0.085174 | -3.247623 |
| H  | 1.013597  | -1.652859 | -2.773868 |
| C  | -0.871391 | -1.153970 | -1.866321 |
| H  | -0.802437 | -2.018746 | -1.209549 |
| H  | -1.480229 | -1.462725 | -2.727926 |
| C  | -2.712503 | -0.594086 | -0.333234 |
| H  | -2.388978 | -1.529145 | 0.126646  |
| H  | -3.521748 | -0.832970 | -1.036406 |
| C  | -3.256171 | 0.337778  | 0.760498  |
| H  | -3.492309 | 1.328795  | 0.358561  |
| H  | -4.221690 | -0.085683 | 1.062139  |
| C  | -2.421920 | 0.442364  | 2.046354  |
| H  | -2.111642 | -0.556684 | 2.354576  |
| H  | -3.048143 | 0.853621  | 2.849422  |
| C  | -1.574683 | 2.721895  | 1.959436  |
| H  | -2.105723 | 2.954067  | 2.891645  |
| H  | -0.694425 | 3.359162  | 1.887033  |
| H  | -2.225915 | 2.944819  | 1.114516  |
| C  | 2.575798  | 2.461930  | 1.182772  |
| H  | 3.329792  | 2.665551  | 1.954192  |
| H  | 1.927157  | 3.331543  | 1.081343  |
| H  | 3.087008  | 2.303729  | 0.236861  |
| C  | 2.150402  | 0.997859  | -2.172244 |
| H  | 2.831277  | 1.544053  | -1.525101 |
| H  | 1.446304  | 1.705359  | -2.606718 |
| H  | 2.733426  | 0.531029  | -2.976251 |
| C  | -2.062862 | 0.954643  | -2.092573 |

|   |           |           |           |   |           |           |           |
|---|-----------|-----------|-----------|---|-----------|-----------|-----------|
| H | -1.244926 | 1.357434  | -2.688659 | O | -0.112315 | -1.279811 | 1.036638  |
| H | -2.540930 | 1.780784  | -1.567072 | O | 0.020267  | -2.098760 | 2.594690  |
| H | -2.795304 | 0.487550  | -2.763841 | H | 0.134788  | -2.121805 | 0.589310  |
| N | -0.009355 | 2.637946  | -0.672397 | H | -0.880020 | -2.475871 | 2.562002  |
| C | -0.046233 | 3.715329  | -1.094581 | N | 0.379166  | -3.892314 | -0.033459 |
| C | -0.093351 | 5.066866  | -1.627951 | C | 0.516373  | -5.022632 | -0.249021 |
| H | 0.825916  | 5.274248  | -2.183576 | C | 0.687944  | -6.444453 | -0.518077 |
| H | -0.189433 | 5.782969  | -0.806552 | H | 1.602263  | -6.805308 | -0.038186 |
| H | -0.951832 | 5.167223  | -2.298529 | H | 0.759263  | -6.612881 | -1.596496 |
| O | -0.062754 | -1.204268 | 1.006239  | H | -0.166581 | -7.002371 | -0.124428 |
| O | 0.344971  | -2.008069 | 2.559719  |   |           |           |           |
| H | 0.133875  | -2.061681 | 0.555953  |   |           |           |           |
| H | -0.537831 | -2.417439 | 2.654168  |   |           |           |           |
| N | 0.345982  | -3.817424 | -0.006426 |   |           |           |           |
| C | 0.523548  | -4.946441 | -0.196750 |   |           |           |           |
| C | 0.747909  | -6.366407 | -0.432955 |   |           |           |           |
| H | 1.415468  | -6.768540 | 0.334582  |   |           |           |           |
| H | 1.204170  | -6.511696 | -1.416395 |   |           |           |           |
| H | -0.204093 | -6.903829 | -0.396810 |   |           |           |           |

=== Model-2, 3TShooh ===

|    |           |           |           |
|----|-----------|-----------|-----------|
| Fe | 0.081138  | 0.579858  | 0.270188  |
| N  | -1.267170 | 1.225819  | 1.777069  |
| N  | 1.598076  | 1.209408  | 1.647124  |
| N  | 1.487049  | -0.037017 | -1.241117 |
| N  | -1.390377 | -0.020939 | -1.147524 |
| C  | -0.488005 | 0.951234  | 3.029577  |
| H  | -1.018171 | 1.370803  | 3.895005  |
| H  | -0.424991 | -0.130256 | 3.149554  |
| C  | 0.899195  | 1.553260  | 2.942948  |
| H  | 1.505680  | 1.211688  | 3.789038  |
| H  | 0.850014  | 2.640934  | 3.009758  |
| C  | 2.488174  | 0.008669  | 1.843129  |
| H  | 3.232762  | 0.273652  | 2.605771  |
| H  | 1.870642  | -0.794369 | 2.242255  |
| C  | 3.244441  | -0.461807 | 0.592093  |
| H  | 3.874262  | -1.295644 | 0.925406  |
| H  | 3.950181  | 0.304868  | 0.258979  |
| C  | 2.444351  | -1.006794 | -0.599311 |
| H  | 1.882169  | -1.889925 | -0.304267 |
| H  | 3.157283  | -1.326129 | -1.371144 |
| C  | 0.690391  | -0.721479 | -2.330697 |
| H  | 0.626063  | -0.028990 | -3.170809 |
| H  | 1.235939  | -1.601067 | -2.688214 |
| C  | -0.705543 | -1.127710 | -1.891492 |
| H  | -0.675660 | -2.002808 | -1.245778 |
| H  | -1.294795 | -1.401181 | -2.777058 |
| C  | -2.635436 | -0.581782 | -0.524143 |
| H  | -2.367134 | -1.529602 | -0.056404 |
| H  | -3.344495 | -0.797311 | -1.333404 |
| C  | -3.299351 | 0.314764  | 0.518371  |
| H  | -3.545876 | 1.300665  | 0.111529  |
| H  | -4.263318 | -0.149498 | 0.757204  |
| C  | -2.529942 | 0.417247  | 1.833585  |
| H  | -2.257816 | -0.583620 | 2.168648  |
| H  | -3.172415 | 0.861784  | 2.604520  |
| C  | -1.635596 | 2.669168  | 1.714621  |
| H  | -2.235889 | 2.928989  | 2.595063  |
| H  | -0.745889 | 3.293599  | 1.692334  |
| H  | -2.215481 | 2.872051  | 0.815291  |
| C  | 2.445278  | 2.395725  | 1.323484  |
| H  | 3.119517  | 2.598184  | 2.164430  |
| H  | 1.812940  | 3.264606  | 1.153428  |
| H  | 3.047843  | 2.226939  | 0.437731  |
| C  | 2.289783  | 1.017255  | -1.934302 |
| H  | 2.962541  | 1.516011  | -1.245122 |
| H  | 1.627994  | 1.758736  | -2.375719 |
| H  | 2.889262  | 0.549451  | -2.724024 |
| C  | -1.787290 | 1.042881  | -2.115993 |
| H  | -0.912856 | 1.446119  | -2.620713 |
| H  | -2.286136 | 1.859101  | -1.596449 |
| H  | -2.470483 | 0.619786  | -2.862383 |
| N  | 0.113284  | 2.842874  | -0.727786 |
| C  | 0.125168  | 3.928765  | -1.132945 |
| C  | 0.138698  | 5.292270  | -1.643044 |
| H  | 1.107199  | 5.504165  | -2.105225 |
| H  | -0.029919 | 5.995510  | -0.822330 |
| H  | -0.651152 | 5.414664  | -2.389874 |

=== Model-2, 5Int ===

|    |           |           |           |
|----|-----------|-----------|-----------|
| Fe | 0.121860  | 0.630477  | 0.350984  |
| N  | -1.357289 | 1.295194  | 1.860003  |
| N  | 1.641352  | 1.391573  | 1.840425  |
| N  | 1.679981  | -0.130288 | -1.087782 |
| N  | -1.306123 | -0.267187 | -1.154428 |
| C  | -0.562047 | 1.081820  | 3.106251  |
| H  | -1.098482 | 1.491491  | 3.974892  |
| H  | -0.465553 | 0.009283  | 3.260234  |
| C  | 0.825275  | 1.732553  | 3.053841  |
| H  | 1.372027  | 1.456439  | 3.965415  |
| H  | 0.716647  | 2.818649  | 3.078144  |
| C  | 2.552057  | 0.234526  | 2.105287  |
| H  | 3.292155  | 0.541009  | 2.861107  |
| H  | 1.953422  | -0.558833 | 2.550078  |
| C  | 3.329694  | -0.309124 | 0.889256  |
| H  | 3.996417  | -1.078871 | 1.298582  |
| H  | 4.003978  | 0.459096  | 0.498291  |
| C  | 2.581151  | -1.002919 | -0.266809 |
| H  | 1.969569  | -1.816159 | 0.121555  |
| H  | 3.336843  | -1.441007 | -0.936545 |
| C  | 0.924738  | -0.939924 | -2.108262 |
| H  | 0.850288  | -0.329372 | -3.010198 |
| H  | 1.508388  | -1.828206 | -2.382997 |
| C  | -0.478103 | -1.390253 | -1.683008 |
| H  | -0.410911 | -2.141354 | -0.897583 |
| H  | -0.964166 | -1.849599 | -2.557984 |
| C  | -2.536938 | -0.785689 | -0.481349 |
| H  | -2.252913 | -1.677210 | 0.079122  |
| H  | -3.257371 | -1.090805 | -1.254929 |
| C  | -3.224062 | 0.205675  | 0.474182  |
| H  | -3.406891 | 1.166536  | -0.019253 |
| H  | -4.220046 | -0.207454 | 0.675844  |
| C  | -2.564378 | 0.409285  | 1.849388  |
| H  | -2.262777 | -0.563334 | 2.239923  |
| H  | -3.305238 | 0.827226  | 2.546089  |
| C  | -1.791995 | 2.710783  | 1.771558  |
| H  | -2.406268 | 2.975175  | 2.643722  |
| H  | -0.929239 | 3.374893  | 1.729899  |
| H  | -2.378687 | 2.865865  | 0.865762  |
| C  | 2.447886  | 2.589532  | 1.498532  |
| H  | 3.097935  | 2.871631  | 2.339064  |
| H  | 1.786453  | 3.423497  | 1.263184  |
| H  | 3.075123  | 2.398827  | 0.629815  |
| C  | 2.494953  | 0.865032  | -1.831559 |
| H  | 3.074689  | 1.480920  | -1.147273 |
| H  | 1.840811  | 1.520564  | -2.406650 |
| H  | 3.188496  | 0.357472  | -2.516341 |
| C  | -1.703191 | 0.633984  | -2.260845 |
| H  | -0.824475 | 1.062771  | -2.742146 |
| H  | -2.307551 | 1.456542  | -1.876906 |
| H  | -2.287767 | 0.083229  | -3.012243 |
| N  | 0.082286  | 2.633494  | -0.704005 |
| C  | 0.048340  | 3.665472  | -1.228437 |
| C  | 0.003841  | 4.962416  | -1.887667 |
| H  | 1.021763  | 5.324812  | -2.058178 |
| H  | -0.531221 | 5.678243  | -1.256853 |
| H  | -0.512436 | 4.872336  | -2.847767 |
| O  | -0.113685 | -1.357062 | 1.099531  |
| O  | 0.246726  | -2.003447 | 2.422345  |
| H  | 0.830763  | -2.827908 | 2.145284  |
| H  | -0.610901 | -2.367917 | 2.728817  |
| N  | 1.677753  | -4.054346 | 1.749957  |
| C  | 2.289409  | -4.998454 | 1.483693  |
| C  | 3.059397  | -6.186064 | 1.147755  |
| H  | 2.380583  | -7.019756 | 0.946632  |
| H  | 3.715461  | -6.447879 | 1.982778  |

H 3.666318 -5.992076 0.258715

=== Model-2, 3Int ===

|    |           |           |           |
|----|-----------|-----------|-----------|
| Fe | 0.106106  | 0.595823  | 0.297192  |
| N  | -1.302012 | 1.191230  | 1.777307  |
| N  | 1.572896  | 1.239408  | 1.724313  |
| N  | 1.564191  | -0.090362 | -1.134863 |
| N  | -1.309420 | -0.141016 | -1.111000 |
| C  | -0.544665 | 0.953396  | 3.042831  |
| H  | -1.100131 | 1.356044  | 3.902044  |
| H  | -0.455744 | -0.122891 | 3.177779  |
| C  | 0.828258  | 1.595009  | 2.983304  |
| H  | 1.414885  | 1.301725  | 3.862341  |
| H  | 0.736461  | 2.681734  | 3.018517  |
| C  | 2.458711  | 0.053780  | 1.981680  |
| H  | 3.180708  | 0.333975  | 2.762179  |
| H  | 1.828894  | -0.736247 | 2.386547  |
| C  | 3.245172  | -0.467028 | 0.770341  |
| H  | 3.864075  | -1.288480 | 1.152546  |
| H  | 3.961424  | 0.285910  | 0.426764  |
| C  | 2.462565  | -1.054463 | -0.411656 |
| H  | 1.833337  | -1.872157 | -0.062812 |
| H  | 3.184975  | -1.454913 | -1.137431 |
| C  | 0.810058  | -0.816210 | -2.218049 |
| H  | 0.725380  | -0.140321 | -3.070916 |
| H  | 1.389049  | -1.682243 | -2.560652 |
| C  | -0.568359 | -1.263682 | -1.768422 |
| H  | -0.489886 | -2.067004 | -1.036167 |
| H  | -1.134061 | -1.635966 | -2.634788 |
| C  | -2.561748 | -0.705800 | -0.511584 |
| H  | -2.283632 | -1.627890 | -0.000568 |
| H  | -3.244534 | -0.964965 | -1.332463 |
| C  | -3.273304 | 0.211441  | 0.481613  |
| H  | -3.513483 | 1.183893  | 0.039157  |
| H  | -4.241546 | -0.254526 | 0.701218  |
| C  | -2.548653 | 0.362654  | 1.818322  |
| H  | -2.269465 | -0.628598 | 2.177178  |
| H  | -3.226419 | 0.803750  | 2.562085  |
| C  | -1.699526 | 2.624051  | 1.693863  |
| H  | -2.306785 | 2.895774  | 2.567526  |
| H  | -0.821984 | 3.265323  | 1.652874  |
| H  | -2.281786 | 2.797823  | 0.789322  |
| C  | 2.426125  | 2.420982  | 1.409885  |
| H  | 3.065291  | 2.656846  | 2.270737  |
| H  | 1.795137  | 3.278854  | 1.183615  |
| H  | 3.065876  | 2.230278  | 0.553663  |
| C  | 2.403939  | 0.924730  | -1.831246 |
| H  | 3.041287  | 1.454219  | -1.129991 |
| H  | 1.763891  | 1.650940  | -2.329777 |
| H  | 3.043061  | 0.431333  | -2.575084 |
| C  | -1.698314 | 0.864385  | -2.138002 |
| H  | -0.816845 | 1.296934  | -2.606044 |
| H  | -2.262225 | 1.673541  | -1.675413 |
| H  | -2.320153 | 0.389853  | -2.908661 |
| N  | 0.149222  | 2.856232  | -0.747608 |
| C  | 0.133587  | 3.913003  | -1.224027 |
| C  | 0.113299  | 5.240778  | -1.824104 |
| H  | 1.136165  | 5.573655  | -2.022870 |
| H  | -0.367790 | 5.948621  | -1.142921 |
| H  | -0.443852 | 5.213834  | -2.765070 |
| O  | -0.107105 | -1.558034 | 1.016907  |
| O  | 0.022380  | -2.220139 | 2.369513  |
| H  | 0.705455  | -2.987702 | 2.206325  |
| H  | -0.850231 | -2.647175 | 2.499131  |
| N  | 1.737027  | -4.138337 | 1.974533  |
| C  | 2.483467  | -5.011612 | 1.844427  |
| C  | 3.423016  | -6.110668 | 1.681493  |
| H  | 2.876555  | -7.033680 | 1.467443  |
| H  | 4.002104  | -6.239466 | 2.600391  |
| H  | 4.103756  | -5.894363 | 0.853218  |

=== Model-2, 5Int-ho-oh1 ===

|    |           |          |           |
|----|-----------|----------|-----------|
| Fe | 0.058026  | 0.589885 | 0.226011  |
| N  | -1.299793 | 1.273974 | 1.832408  |
| N  | 1.666181  | 1.213223 | 1.668484  |
| N  | 1.534701  | 0.004634 | -1.377991 |
| N  | -1.433219 | 0.022430 | -1.322053 |
| C  | -0.479051 | 0.905360 | 3.033592  |

|   |           |           |           |
|---|-----------|-----------|-----------|
| H | -0.961923 | 1.293300  | 3.941044  |
| H | -0.446963 | -0.181391 | 3.098559  |
| C | 0.937040  | 1.478579  | 2.964101  |
| H | 1.519898  | 1.075130  | 3.800298  |
| H | 0.906512  | 2.561134  | 3.098354  |
| C | 2.541115  | -0.007373 | 1.780739  |
| H | 3.306702  | 0.202124  | 2.540993  |
| H | 1.915144  | -0.821995 | 2.143560  |
| C | 3.269742  | -0.426994 | 0.490034  |
| H | 3.923693  | -1.255848 | 0.788176  |
| H | 3.954750  | 0.361319  | 0.163667  |
| C | 2.469246  | -0.967966 | -0.709424 |
| H | 1.887643  | -1.838901 | -0.411483 |
| H | 3.190598  | -1.307361 | -1.465951 |
| C | 0.710063  | -0.676561 | -2.443881 |
| H | 0.640445  | 0.012735  | -3.286819 |
| H | 1.240018  | -1.564045 | -2.807636 |
| C | -0.696124 | -1.089729 | -2.003699 |
| H | -0.655151 | -1.936664 | -1.321381 |
| H | -1.252415 | -1.414376 | -2.893288 |
| C | -2.655738 | -0.515889 | -0.634920 |
| H | -2.379349 | -1.465706 | -0.174720 |
| H | -3.408552 | -0.725142 | -1.406390 |
| C | -3.272039 | 0.397261  | 0.436363  |
| H | -3.453503 | 1.404744  | 0.046526  |
| H | -4.267769 | -0.013580 | 0.640797  |
| C | -2.548539 | 0.440936  | 1.791504  |
| H | -2.270524 | -0.572465 | 2.082888  |
| H | -3.236393 | 0.832425  | 2.552720  |
| C | -1.668471 | 2.712227  | 1.884109  |
| H | -2.264164 | 2.908901  | 2.784457  |
| H | -0.776482 | 3.336630  | 1.908148  |
| H | -2.252794 | 2.983735  | 1.005283  |
| C | 2.508989  | 2.408604  | 1.392081  |
| H | 3.217190  | 2.565678  | 2.215788  |
| H | 1.878415  | 3.291493  | 1.293792  |
| H | 3.074281  | 2.285856  | 0.471876  |
| C | 2.337647  | 1.061567  | -2.054673 |
| H | 2.969980  | 1.585359  | -1.342332 |
| H | 1.676322  | 1.785559  | -2.528568 |
| H | 2.978323  | 0.607801  | -2.821150 |
| C | -1.837388 | 1.043456  | -2.324130 |
| H | -0.960756 | 1.470306  | -2.808929 |
| H | -2.388966 | 1.849979  | -1.842128 |
| H | -2.476906 | 0.581769  | -3.086933 |
| N | 0.083414  | 2.652549  | -0.602164 |
| C | 0.062436  | 3.738118  | -1.003475 |
| C | 0.033629  | 5.101072  | -1.505415 |
| H | 1.053379  | 5.436712  | -1.715574 |
| H | -0.417462 | 5.756991  | -0.754905 |
| H | -0.558609 | 5.140336  | -2.424380 |
| O | -0.085585 | -1.086237 | 0.949571  |
| O | 0.092255  | -2.314191 | 2.989502  |
| H | 0.120806  | -1.984687 | 0.616009  |
| H | -0.721324 | -2.717265 | 2.620920  |
| N | 0.309369  | -3.823117 | 0.094408  |
| C | 0.454354  | -4.963364 | -0.054975 |
| C | 0.637592  | -6.397235 | -0.240528 |
| H | 1.460320  | -6.750490 | 0.387798  |
| H | 0.870633  | -6.609879 | -1.287892 |
| H | -0.277628 | -6.928074 | 0.037072  |

=== Model-2, 3Int-ho-oh1 ===

|    |           |           |           |
|----|-----------|-----------|-----------|
| Fe | 0.058160  | 0.575013  | 0.264692  |
| N  | -1.280272 | 1.277447  | 1.790248  |
| N  | 1.608476  | 1.203618  | 1.648660  |
| N  | 1.465903  | -0.059019 | -1.263259 |
| N  | -1.425716 | -0.007712 | -1.173730 |
| C  | -0.490702 | 0.963040  | 3.029817  |
| H  | -1.007212 | 1.384354  | 3.902671  |
| H  | -0.445005 | -0.120628 | 3.134402  |
| C  | 0.905164  | 1.545685  | 2.944034  |
| H  | 1.505288  | 1.185781  | 3.786813  |
| H  | 0.875019  | 2.633386  | 3.019997  |
| C  | 2.474384  | -0.015000 | 1.833457  |
| H  | 3.225473  | 0.235588  | 2.594564  |
| H  | 1.834587  | -0.805345 | 2.222818  |
| C  | 3.217194  | -0.490205 | 0.577779  |



|   |           |           |           |
|---|-----------|-----------|-----------|
| H | -2.501927 | -0.369719 | 1.955120  |
| H | -3.266357 | 1.121181  | 2.533489  |
| C | -1.540300 | 2.832226  | 1.822240  |
| H | -2.105248 | 3.066436  | 2.732514  |
| H | -0.588991 | 3.358478  | 1.849910  |
| H | -2.099632 | 3.180563  | 0.955304  |
| C | 2.463969  | 2.209317  | 1.324125  |
| H | 3.171965  | 2.287392  | 2.157964  |
| H | 1.897189  | 3.134775  | 1.248670  |
| H | 3.027934  | 2.070662  | 0.406978  |
| C | 2.174655  | 1.045336  | -2.070100 |
| H | 2.877157  | 1.458580  | -1.353531 |
| H | 1.590323  | 1.859022  | -2.494249 |
| H | 2.743143  | 0.555228  | -2.869641 |
| C | -1.895274 | 1.471014  | -2.243389 |
| H | -0.982256 | 1.828155  | -2.714013 |
| H | -2.342055 | 2.297960  | -1.693120 |
| H | -2.593599 | 1.140123  | -3.021761 |
| N | 0.174924  | 2.900272  | -0.615145 |
| C | 0.281414  | 3.989447  | -0.995164 |
| C | 0.418568  | 5.357073  | -1.471631 |
| H | 1.458449  | 5.544468  | -1.755237 |
| H | 0.128426  | 6.053352  | -0.679246 |
| H | -0.226965 | 5.510348  | -2.341547 |
| O | -0.411975 | -1.088519 | 0.673460  |
| O | 0.257061  | -2.708183 | 2.943567  |
| H | -0.103874 | -1.590729 | 1.452759  |
| H | 0.506786  | -3.545235 | 2.456684  |
| N | 0.951268  | -4.991708 | 1.425164  |
| C | 1.207465  | -5.935235 | 0.803650  |
| C | 1.527808  | -7.122879 | 0.021562  |
| H | 2.261471  | -7.733630 | 0.555573  |
| H | 1.943628  | -6.829221 | -0.946609 |
| H | 0.622714  | -7.714766 | -0.142761 |

=== Model-2, 5TSoo ===

|    |           |           |           |
|----|-----------|-----------|-----------|
| Fe | 0.120528  | 0.601519  | 0.377357  |
| N  | -1.363265 | 1.313526  | 1.862303  |
| N  | 1.632932  | 1.403623  | 1.847911  |
| N  | 1.679904  | -0.149565 | -1.069194 |
| N  | -1.298217 | -0.288981 | -1.140217 |
| C  | -0.574219 | 1.107784  | 3.114471  |
| H  | -1.112079 | 1.529429  | 3.976233  |
| H  | -0.484064 | 0.036196  | 3.279061  |
| C  | 0.816892  | 1.751336  | 3.060808  |
| H  | 1.361897  | 1.474170  | 3.972806  |
| H  | 0.713923  | 2.837991  | 3.082745  |
| C  | 2.552347  | 0.254291  | 2.121334  |
| H  | 3.290357  | 0.572857  | 2.873871  |
| H  | 1.958895  | -0.539506 | 2.572049  |
| C  | 3.333816  | -0.292816 | 0.908976  |
| H  | 4.007614  | -1.052899 | 1.324643  |
| H  | 4.001061  | 0.477974  | 0.511113  |
| C  | 2.593165  | -1.004005 | -0.242005 |
| H  | 1.994284  | -1.824354 | 0.150564  |
| H  | 3.354659  | -1.435490 | -0.909291 |
| C  | 0.932353  | -0.978380 | -2.081052 |
| H  | 0.867626  | -0.385757 | -2.995400 |
| H  | 1.517098  | -1.872421 | -2.332648 |
| C  | -0.476410 | -1.419585 | -1.663356 |
| H  | -0.420851 | -2.171692 | -0.878509 |
| H  | -0.960962 | -1.873097 | -2.541859 |
| C  | -2.535579 | -0.793263 | -0.467589 |
| H  | -2.260587 | -1.682130 | 0.101576  |
| H  | -3.253454 | -1.100293 | -1.242454 |
| C  | -3.222465 | 0.211745  | 0.474027  |
| H  | -3.398700 | 1.167523  | -0.031544 |
| H  | -4.221348 | -0.195156 | 0.673736  |
| C  | -2.572124 | 0.429408  | 1.851759  |
| H  | -2.275971 | -0.538825 | 2.257181  |
| H  | -3.317584 | 0.857256  | 2.537240  |
| C  | -1.793713 | 2.729175  | 1.759297  |
| H  | -2.413146 | 3.001898  | 2.625099  |
| H  | -0.929060 | 3.390834  | 1.718981  |
| H  | -2.373846 | 2.878345  | 0.848356  |
| C  | 2.431675  | 2.603298  | 1.492770  |
| H  | 3.083635  | 2.894597  | 2.328472  |
| H  | 1.765379  | 3.432442  | 1.254582  |

|   |           |           |           |
|---|-----------|-----------|-----------|
| H | 3.056053  | 2.409273  | 0.622813  |
| C | 2.482711  | 0.847769  | -1.824085 |
| H | 3.055406  | 1.477921  | -1.146903 |
| H | 1.820907  | 1.488987  | -2.406271 |
| H | 3.181763  | 0.340664  | -2.503353 |
| C | -1.684717 | 0.609711  | -2.253410 |
| H | -0.800972 | 1.024963  | -2.737006 |
| H | -2.281250 | 1.440994  | -1.876777 |
| H | -2.273442 | 0.058202  | -3.000594 |
| N | 0.074001  | 2.593012  | -0.705872 |
| C | 0.050627  | 3.628074  | -1.224536 |
| C | 0.019534  | 4.928593  | -1.877146 |
| H | 1.041144  | 5.281834  | -2.044780 |
| H | -0.509369 | 5.646221  | -1.243184 |
| H | -0.496597 | 4.848040  | -2.838169 |
| O | -0.101444 | -1.248478 | 1.093615  |
| O | 0.252448  | -1.988483 | 2.463228  |
| H | 0.821540  | -2.788549 | 2.143333  |
| H | -0.621544 | -2.362649 | 2.700635  |
| N | 1.686371  | -4.055864 | 1.699374  |
| C | 2.291632  | -4.999137 | 1.413868  |
| C | 3.054309  | -6.185593 | 1.055362  |
| H | 2.371693  | -7.017019 | 0.857808  |
| H | 3.723311  | -6.456024 | 1.877296  |
| H | 3.647617  | -5.985635 | 0.158481  |

=== Model-2, 3TSoo ===

|    |           |           |           |
|----|-----------|-----------|-----------|
| Fe | 0.103124  | 0.551549  | 0.329043  |
| N  | -1.312952 | 1.208576  | 1.783530  |
| N  | 1.562560  | 1.236241  | 1.740999  |
| N  | 1.571262  | -0.129893 | -1.106732 |
| N  | -1.301570 | -0.166786 | -1.096579 |
| C  | -0.566057 | 0.979280  | 3.057168  |
| H  | -1.121103 | 1.402106  | 3.906780  |
| H  | -0.491566 | -0.095653 | 3.208536  |
| C  | 0.816619  | 1.601910  | 2.998341  |
| H  | 1.396691  | 1.301378  | 3.878976  |
| H  | 0.739208  | 2.689740  | 3.033429  |
| C  | 2.466025  | 0.066120  | 2.010517  |
| H  | 3.189336  | 0.369523  | 2.780960  |
| H  | 1.850457  | -0.724843 | 2.433993  |
| C  | 3.255712  | -0.461873 | 0.803435  |
| H  | 3.884140  | -1.271249 | 1.195855  |
| H  | 3.964077  | 0.295123  | 0.452580  |
| C  | 2.487146  | -1.072203 | -0.377349 |
| H  | 1.877397  | -1.904837 | -0.031158 |
| H  | 3.221167  | -1.457937 | -1.099370 |
| C  | 0.821159  | -0.871657 | -2.183800 |
| H  | 0.752615  | -0.212300 | -3.050864 |
| H  | 1.396208  | -1.749108 | -2.502454 |
| C  | -0.568844 | -1.299897 | -1.747325 |
| H  | -0.508791 | -2.103325 | -1.014839 |
| H  | -1.130621 | -1.662058 | -2.620251 |
| C  | -2.561885 | -0.713959 | -0.497662 |
| H  | -2.295516 | -1.632267 | 0.026429  |
| H  | -3.240871 | -0.979127 | -1.319632 |
| C  | -3.275027 | 0.222672  | 0.476863  |
| H  | -3.503542 | 1.190263  | 0.017927  |
| H  | -4.249010 | -0.232968 | 0.692577  |
| C  | -2.565400 | 0.389163  | 1.820239  |
| H  | -2.298512 | -0.598288 | 2.198447  |
| H  | -3.250190 | 0.845372  | 2.548209  |
| C  | -1.696933 | 2.642900  | 1.677991  |
| H  | -2.315382 | 2.929330  | 2.538999  |
| H  | -0.813435 | 3.276414  | 1.644868  |
| H  | -2.262869 | 2.811516  | 0.762294  |
| C  | 2.400902  | 2.423503  | 1.406881  |
| H  | 3.047241  | 2.672046  | 2.258628  |
| H  | 1.759916  | 3.273683  | 1.181053  |
| H  | 3.032179  | 2.232083  | 0.544674  |
| C  | 2.397168  | 0.889915  | -1.813958 |
| H  | 3.033904  | 1.428689  | -1.119364 |
| H  | 1.748611  | 1.607457  | -2.313535 |
| H  | 3.036519  | 0.397466  | -2.558081 |
| C  | -1.676057 | 0.835734  | -2.132341 |
| H  | -0.788358 | 1.248260  | -2.606458 |
| H  | -2.225802 | 1.658654  | -1.677766 |
| H  | -2.306176 | 0.362687  | -2.896905 |

|   |           |           |           |
|---|-----------|-----------|-----------|
| N | 0.146039  | 2.817800  | -0.753628 |
| C | 0.134134  | 3.877274  | -1.224147 |
| C | 0.117602  | 5.209210  | -1.814972 |
| H | 1.141550  | 5.543084  | -2.006245 |
| H | -0.366586 | 5.912238  | -1.130957 |
| H | -0.435024 | 5.189380  | -2.758762 |
| O | -0.078482 | -1.406974 | 1.011186  |
| O | 0.027296  | -2.168085 | 2.392211  |
| H | 0.697313  | -2.922373 | 2.184111  |
| H | -0.851763 | -2.594825 | 2.453892  |
| N | 1.740407  | -4.108806 | 1.907432  |
| C | 2.482191  | -4.982788 | 1.753857  |
| C | 3.416109  | -6.082823 | 1.563569  |
| H | 2.863709  | -7.005476 | 1.363653  |
| H | 4.020488  | -6.213362 | 2.465775  |
| H | 4.074267  | -5.866774 | 0.717150  |

=== Model-2, 5TShat ===

|    |           |           |           |
|----|-----------|-----------|-----------|
| Fe | -0.127357 | 0.000253  | 0.018060  |
| N  | 0.020290  | 0.025584  | 2.239453  |
| N  | 2.119105  | -0.204766 | 0.144135  |
| N  | -0.140115 | -0.034662 | -2.238729 |
| N  | -2.314620 | 0.199049  | -0.228601 |
| C  | 1.198338  | -0.876683 | 2.437223  |
| H  | 1.492812  | -0.880084 | 3.495235  |
| H  | 0.888820  | -1.887966 | 2.179147  |
| C  | 2.408317  | -0.449405 | 1.604708  |
| H  | 3.188596  | -1.212987 | 1.701745  |
| H  | 2.823929  | 0.474059  | 2.011068  |
| C  | 2.454520  | -1.416967 | -0.680789 |
| H  | 3.539807  | -1.574659 | -0.611324 |
| H  | 1.972228  | -2.278152 | -0.220020 |
| C  | 2.087052  | -1.339385 | -2.173783 |
| H  | 2.477126  | -2.267096 | -2.610325 |
| H  | 2.655616  | -0.543031 | -2.663390 |
| C  | 0.609552  | -1.286891 | -2.602979 |
| H  | 0.064866  | -2.127710 | -2.175801 |
| H  | 0.576892  | -1.385135 | -3.696987 |
| C  | -1.596408 | -0.154272 | -2.611378 |
| H  | -1.919531 | 0.822922  | -2.973769 |
| H  | -1.703792 | -0.851008 | -3.450933 |
| C  | -2.508818 | -0.611891 | -1.473593 |
| H  | -2.308751 | -1.650774 | -1.218147 |
| H  | -3.551113 | -0.531592 | -1.809865 |
| C  | -3.004317 | -0.467636 | 0.926788  |
| H  | -2.842310 | -1.541737 | 0.825817  |
| H  | -4.081231 | -0.280374 | 0.824006  |
| C  | -2.544586 | -0.019937 | 2.322447  |
| H  | -2.558530 | 1.070904  | 2.419441  |
| H  | -3.309593 | -0.380124 | 3.020252  |
| C  | -1.213776 | -0.608067 | 2.813178  |
| H  | -1.180660 | -1.670624 | 2.566928  |
| H  | -1.158115 | -0.516620 | 3.905913  |
| C  | 0.257656  | 1.333744  | 2.903301  |
| H  | 0.405756  | 1.182825  | 3.980074  |
| H  | 1.140228  | 1.820310  | 2.490084  |
| H  | -0.598583 | 1.990626  | 2.752131  |
| C  | 2.972928  | 0.935673  | -0.289749 |
| H  | 4.031658  | 0.685212  | -0.146690 |
| H  | 2.735573  | 1.820993  | 0.298594  |
| H  | 2.811165  | 1.165878  | -1.340151 |
| C  | 0.416798  | 1.117280  | -2.999355 |
| H  | 1.473553  | 1.253569  | -2.782755 |
| H  | -0.111426 | 2.030872  | -2.728641 |
| H  | 0.302114  | 0.944504  | -4.077139 |
| C  | -2.864355 | 1.567802  | -0.410799 |
| H  | -2.355024 | 2.081759  | -1.224821 |
| H  | -2.727842 | 2.150610  | 0.500038  |
| H  | -3.935548 | 1.509747  | -0.641371 |
| N  | 0.112539  | 2.160343  | -0.041902 |
| C  | 0.209657  | 3.313356  | -0.060165 |
| C  | 0.333771  | 4.760031  | -0.082765 |
| H  | 0.858415  | 5.095811  | 0.816639  |
| H  | -0.662171 | 5.211859  | -0.112488 |
| H  | 0.898543  | 5.065166  | -0.968605 |
| O  | -0.391016 | -1.739875 | 0.111336  |
| O  | 0.005221  | -4.011670 | 0.509407  |
| H  | 0.003586  | -2.706606 | 0.350404  |

|   |           |           |           |
|---|-----------|-----------|-----------|
| H | -0.045065 | -4.390860 | -0.408169 |
| N | -0.102130 | -5.062334 | -2.146407 |
| C | -0.177598 | -5.569620 | -3.185490 |
| C | -0.271531 | -6.209490 | -4.492031 |
| H | -0.330137 | -7.295001 | -4.370509 |
| H | 0.610213  | -5.964429 | -5.091228 |
| H | -1.166996 | -5.860063 | -5.014072 |

=== Model-2, 3TShat ===

|    |           |           |           |
|----|-----------|-----------|-----------|
| Fe | -0.154045 | -0.020614 | 0.009226  |
| N  | -0.016681 | 0.007504  | 2.152789  |
| N  | 2.011844  | -0.252921 | 0.100429  |
| N  | -0.218761 | -0.053527 | -2.157195 |
| N  | -2.285311 | 0.205136  | -0.152882 |
| C  | 1.153169  | -0.901908 | 2.388167  |
| H  | 1.425293  | -0.881040 | 3.451458  |
| H  | 0.839929  | -1.915546 | 2.146568  |
| C  | 2.350748  | -0.484446 | 1.556539  |
| H  | 3.134519  | -1.245608 | 1.631407  |
| H  | 2.774645  | 0.441923  | 1.945804  |
| C  | 2.351755  | -1.474676 | -0.710554 |
| H  | 3.439361  | -1.611259 | -0.647042 |
| H  | 1.890069  | -2.337740 | -0.233833 |
| C  | 1.967327  | -1.414734 | -2.193802 |
| H  | 2.315119  | -2.362314 | -2.622406 |
| H  | 2.546183  | -0.644214 | -2.711376 |
| C  | 0.482727  | -1.321691 | -2.567320 |
| H  | -0.069941 | -2.150178 | -2.128652 |
| H  | 0.404180  | -1.392807 | -3.660049 |
| C  | -1.679967 | -0.126597 | -2.540420 |
| H  | -1.979445 | 0.863743  | -2.885178 |
| H  | -1.797069 | -0.805646 | -3.391630 |
| C  | -2.565983 | -0.582282 | -1.398976 |
| H  | -2.384509 | -1.628313 | -1.164043 |
| H  | -3.619414 | -0.458275 | -1.680765 |
| C  | -3.015385 | -0.440239 | 0.985793  |
| H  | -2.880684 | -1.517138 | 0.884990  |
| H  | -4.082049 | -0.215662 | 0.857692  |
| C  | -2.563852 | -0.007980 | 2.379272  |
| H  | -2.589086 | 1.079767  | 2.500493  |
| H  | -3.310839 | -0.395882 | 3.081412  |
| C  | -1.222087 | -0.598912 | 2.806700  |
| H  | -1.212805 | -1.664307 | 2.575217  |
| H  | -1.096377 | -0.484719 | 3.890788  |
| C  | 0.248712  | 1.339616  | 2.768200  |
| H  | 0.420110  | 1.212440  | 3.843517  |
| H  | 1.124923  | 1.804314  | 2.321770  |
| H  | -0.605188 | 1.998721  | 2.620132  |
| C  | 2.873115  | 0.878985  | -0.353953 |
| H  | 3.924854  | 0.621374  | -0.182362 |
| H  | 2.630761  | 1.779074  | 0.206495  |
| H  | 2.738109  | 1.077836  | -1.412656 |
| C  | 0.357296  | 1.095733  | -2.915126 |
| H  | 1.421308  | 1.199867  | -2.728088 |
| H  | -0.140199 | 2.019344  | -2.625816 |
| H  | 0.208411  | 0.929219  | -3.988748 |
| C  | -2.774826 | 1.604161  | -0.310725 |
| H  | -2.266583 | 2.102613  | -1.132639 |
| H  | -2.595984 | 2.171158  | 0.601198  |
| H  | -3.851937 | 1.587661  | -0.515187 |
| N  | 0.132406  | 2.236942  | -0.068387 |
| C  | 0.252123  | 3.388554  | -0.091178 |
| C  | 0.402157  | 4.833993  | -0.117780 |
| H  | 0.930564  | 5.164187  | 0.781456  |
| H  | -0.585071 | 5.304343  | -0.150943 |
| H  | 0.973998  | 5.127741  | -1.002863 |
| O  | -0.512561 | -1.803976 | 0.113371  |
| O  | 0.215739  | -4.065758 | 0.544437  |
| H  | 0.038842  | -2.619708 | 0.364193  |
| H  | 0.169940  | -4.424211 | -0.377598 |
| N  | 0.148792  | -5.059261 | -2.181435 |
| C  | 0.092538  | -5.557297 | -3.226601 |
| C  | 0.023208  | -6.185503 | -4.540710 |
| H  | -0.807011 | -6.897175 | -4.569464 |
| H  | 0.956184  | -6.717217 | -4.748902 |
| H  | -0.133114 | -5.424114 | -5.310399 |

=== Model-2, 5P ===



|    |           |           |           |   |           |           |           |
|----|-----------|-----------|-----------|---|-----------|-----------|-----------|
| Fe | 0.362108  | 0.462799  | -0.355506 | H | 3.610327  | 1.248626  | 1.954496  |
| N  | 0.217081  | 0.193965  | 1.823628  | H | 2.282576  | 2.388761  | 2.083505  |
| N  | 2.515182  | 0.948816  | 0.105950  | C | 3.490131  | 0.611506  | -0.435670 |
| N  | 0.697039  | 0.656512  | -2.575631 | H | 4.448895  | 1.068260  | -0.159426 |
| N  | -1.677506 | -0.110981 | -0.960901 | H | 3.444994  | -0.379207 | 0.014668  |
| C  | 1.605314  | -0.265378 | 2.148862  | C | 3.432313  | 0.503315  | -1.962300 |
| H  | 1.731254  | -0.305957 | 3.238832  | H | 4.303041  | -0.098699 | -2.248912 |
| H  | 1.732655  | -1.274832 | 1.756164  | H | 3.602664  | 1.479580  | -2.426644 |
| C  | 2.664811  | 0.671426  | 1.577164  | C | 2.223102  | -0.193978 | -2.592919 |
| H  | 3.655274  | 0.242268  | 1.768459  | H | 2.135518  | -1.210791 | -2.211868 |
| H  | 2.634173  | 1.631395  | 2.094836  | H | 2.381806  | -0.247047 | -3.677433 |
| C  | 3.331032  | -0.023959 | -0.700092 | C | -0.203717 | -0.346274 | -2.988622 |
| H  | 4.387133  | 0.148521  | -0.450081 | H | -0.948786 | 0.340680  | -3.392094 |
| H  | 3.070969  | -1.026968 | -0.361310 | H | 0.198532  | -0.910877 | -3.836164 |
| C  | 3.185858  | 0.079747  | -2.227045 | C | -0.841183 | -1.291765 | -1.995801 |
| H  | 3.900183  | -0.647447 | -2.632290 | H | -0.144995 | -2.075936 | -1.701944 |
| H  | 3.548778  | 1.049458  | -2.581303 | H | -1.722026 | -1.764054 | -2.447816 |
| C  | 1.842134  | -0.267353 | -2.887507 | C | -1.639458 | -1.595558 | 0.265695  |
| H  | 1.535614  | -1.273854 | -2.601256 | H | -0.885343 | -2.383277 | 0.236796  |
| H  | 1.986109  | -0.256213 | -3.976606 | H | -2.589721 | -2.030297 | -0.067059 |
| C  | -0.576114 | 0.151412  | -3.197215 | C | -1.768861 | -1.087193 | 1.695997  |
| H  | -1.163273 | 1.022767  | -3.491505 | H | -2.456259 | -0.238846 | 1.774603  |
| H  | -0.341364 | -0.395839 | -4.117663 | H | -2.235387 | -1.894026 | 2.272705  |
| C  | -1.405656 | -0.748887 | -2.286949 | C | -0.424591 | -0.805740 | 2.354254  |
| H  | -0.888432 | -1.689354 | -2.099777 | H | 0.242503  | -1.653648 | 2.194247  |
| H  | -2.354438 | -0.975379 | -2.789959 | H | -0.555869 | -0.686924 | 3.436768  |
| C  | -2.207086 | -1.142519 | -0.006390 | C | -0.373631 | 1.621738  | 2.451210  |
| H  | -1.636128 | -2.058498 | -0.168251 | H | -0.353156 | 1.540968  | 3.543694  |
| H  | -3.248374 | -1.346057 | -0.287083 | H | 0.139403  | 2.533883  | 2.155877  |
| C  | -2.139014 | -0.765229 | 1.478009  | H | -1.408922 | 1.682169  | 2.119685  |
| H  | -2.574314 | 0.222027  | 1.664033  | C | 2.597157  | 2.869688  | -0.194394 |
| H  | -2.794164 | -1.471720 | 2.000532  | H | 3.574809  | 3.209910  | 0.166257  |
| C  | -0.758993 | -0.905252 | 2.130369  | H | 1.821984  | 3.488363  | 0.252920  |
| H  | -0.304620 | -1.845559 | 1.814291  | H | 2.568922  | 2.994314  | -1.271381 |
| H  | -0.874842 | -0.945704 | 3.221044  | C | 0.887082  | 1.781677  | -3.109363 |
| C  | -0.131044 | 1.400943  | 2.621218  | H | 1.693069  | 2.429852  | -2.782639 |
| H  | -0.075763 | 1.161293  | 3.690115  | H | -0.061186 | 2.292990  | -2.956846 |
| H  | 0.557122  | 2.217524  | 2.407588  | H | 1.016000  | 1.584208  | -4.179856 |
| H  | -1.142265 | 1.730941  | 2.384655  | C | -2.435466 | 0.297334  | -1.031570 |
| C  | 3.004448  | 2.334942  | -0.129418 | H | -2.209470 | 1.031293  | -1.801111 |
| H  | 4.048925  | 2.419285  | 0.195722  | H | -2.742455 | 0.822757  | -0.128896 |
| H  | 2.399492  | 3.043209  | 0.435738  | H | -3.262089 | -0.334367 | -1.375600 |
| H  | 2.950443  | 2.595051  | -1.182803 | N | -0.397425 | 2.308177  | -0.394398 |
| C  | 0.962915  | 2.000498  | -3.158691 | C | -0.928338 | 3.331424  | -0.485147 |
| H  | 1.890152  | 2.417066  | -2.775341 | C | -1.596313 | 4.615382  | -0.595672 |
| H  | 0.147696  | 2.680201  | -2.913981 | H | -1.228274 | 5.144727  | -1.479596 |
| H  | 1.044149  | 1.920225  | -4.250027 | H | -1.390625 | 5.212208  | 0.298063  |
| C  | -2.668995 | 0.988634  | -1.104073 | H | -2.675102 | 4.458021  | -0.688061 |
| H  | -2.304006 | 1.750483  | -1.791071 | O | 1.240500  | -0.984780 | -0.128297 |
| H  | -2.853360 | 1.454994  | -0.137104 | O | 2.298023  | -3.072949 | 1.548268  |
| H  | -3.612670 | 0.584747  | -1.490796 | H | 1.560578  | -3.685153 | 1.736563  |
| N  | -0.133387 | 2.443977  | -0.236124 | H | 1.966800  | -2.527065 | 0.814598  |
| C  | -0.431723 | 3.559280  | -0.172265 | N | -0.070439 | -4.783821 | 2.026443  |
| C  | -0.803974 | 4.958908  | -0.091600 | C | -0.945294 | -5.494703 | 2.298079  |
| H  | -0.016809 | 5.571909  | -0.540693 | C | -2.044371 | -6.390284 | 2.640791  |
| H  | -0.932871 | 5.241239  | 0.957565  | H | -2.678004 | -5.928593 | 3.403562  |
| H  | -1.742862 | 5.117998  | -0.630435 | H | -1.648702 | -7.333003 | 3.029857  |
| O  | 0.716952  | -1.109451 | -0.441058 | H | -2.648497 | -6.597332 | 1.752699  |
| O  | 2.180313  | -3.366704 | 0.608899  |   |           |           |           |
| H  | 1.604004  | -3.857310 | 1.227418  |   |           |           |           |
| H  | 1.562420  | -2.830789 | 0.085298  |   |           |           |           |
| N  | 0.328591  | -4.756471 | 2.434016  |   |           |           |           |
| C  | -0.332320 | -5.390871 | 3.144446  |   |           |           |           |
| C  | -1.162444 | -6.189847 | 4.038722  |   |           |           |           |
| H  | -1.974547 | -6.658371 | 3.475339  |   |           |           |           |
| H  | -1.590616 | -5.553706 | 4.818732  |   |           |           |           |
| H  | -0.558168 | -6.971243 | 4.508615  |   |           |           |           |

=== Model-2, 3P ===

|    |           |           |           |
|----|-----------|-----------|-----------|
| Fe | 0.537229  | 0.464895  | -0.244891 |
| N  | 0.288217  | 0.421489  | 1.859699  |
| N  | 2.403575  | 1.440777  | 0.198184  |
| N  | 0.895288  | 0.483106  | -2.370440 |
| N  | -1.246633 | -0.561239 | -0.749364 |
| C  | 1.706519  | 0.333723  | 2.343569  |
| H  | 1.726712  | 0.458336  | 3.433478  |
| H  | 2.073670  | -0.665209 | 2.111582  |
| C  | 2.556824  | 1.405235  | 1.699829  |
